# Supplementary material
Source: publisher figshare collection journal article supplement (https://acs.figshare.com/ndownloader/files/28675217)

*Supporting Information for*

**Designing and Accurate Developing [6+2] Dipolar Cycloaddition for  
Synthesis of Benzodiazocines**

Wei Cai, Yiming Zhou, Yanlin He, Kaihong Chen, Cui Yu, and You Huang\*

State Key Laboratory and Institute of Elemento-Organic Chemistry, College of Chemistry, Nankai University,  
Tianjin 300071, People's Republic of China

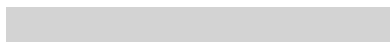

## CONTENTS

|      |                                                                                                       |    |
|------|-------------------------------------------------------------------------------------------------------|----|
| 1.   | General methods .....                                                                                 | 3  |
| 2.   | Synthesis of <i>o</i> -amino-acylation aryl MBH carbonates 1 .....                                    | 4  |
| 2.1  | General procedure for the synthesis of substituted <i>o</i> -amino-acylation aryl MBH carbonates..... | 4  |
| 2.2. | Characterization Data of <i>o</i> -amino-acylation aryl MBH carbonates.....                           | 6  |
| 3.   | General Procedure of Optimization and Substrate Scope.....                                            | 10 |
| 3.1. | General procedure 1 (GP1) for the synthesis of benzodiazocine.....                                    | 10 |
| 3.2. | Optimization of intermolecular cycloaddition reaction conditions.....                                 | 10 |
| 4.   | Gram scale reactions and synthetic transformations.....                                               | 11 |
| 4.1. | Gram scale reactions .....                                                                            | 11 |
| 4.2. | Synthetic transformations .....                                                                       | 11 |
| 5.   | Density Functional Theory (DFT) Calculations .....                                                    | 12 |
| 5.1. | Computational Methods.....                                                                            | 12 |
| 5.2. | Calculated data.....                                                                                  | 13 |
| 6.   | Analytical Data .....                                                                                 | 15 |
| 6.1. | Cs <sub>2</sub> CO <sub>3</sub> catalyzed [6+2] cycloadducts 3 .....                                  | 15 |
| 6.2. | Products of derivatization .....                                                                      | 24 |
| 7.   | X-ray Crystallographic Analysis.....                                                                  | 26 |
| 8.   | NMR Spectra .....                                                                                     | 27 |
| 8.1. | Cs <sub>2</sub> CO <sub>3</sub> catalyzed [6+2] cycloadducts 3 .....                                  | 27 |
| 8.2. | Products of Derivatization .....                                                                      | 70 |

## 1. General methods

$^1\text{H}$  NMR (400 MHz) and  $^{13}\text{C}$  NMR (101 MHz) were recorded on a Bruker AV 400 (400 MHz) spectrometer with  $\text{CDCl}_3$  or  $\text{DMSO-}d_6$  as solvent (Unless otherwise noted, records are all performed at ambient temperature). Chemical shifts were reported in parts per million (ppm), and the residual solvent peak was used as an internal reference: proton ( $\text{CDCl}_3$ :  $\delta$  7.26 ppm,  $\text{DMSO-}d_6$ :  $\delta$  2.50 ppm), carbon ( $\text{CDCl}_3$ :  $\delta$  77.07 ppm,  $\text{DMSO-}d_6$ :  $\delta$  39.50 ppm) or tetramethylsilane (TMS  $\delta$  0.00). Multiplicity is indicated as follows: s (singlet), d (doublet), t (triplet), q (quartet), dd (doublet of doublet), m (multiplet). Coupling constants  $J$  are reported in Hz. HRMS were obtained on Agilent 6520 Q-TOF LC/MS with ESI resource. Melting points were measured on a RY-I apparatus and are reported uncorrected. Column chromatography was performed on silica gel 200-300 mesh.

All reactions were carried out under nitrogen or argon atmosphere. Unless otherwise noted, analytical grade solvents and commercially available reagents were used without further purification. All isocyanates used in the article are commercially available.

## 2. Synthesis of *o*-amino-acylation aryl MBH carbonates 1

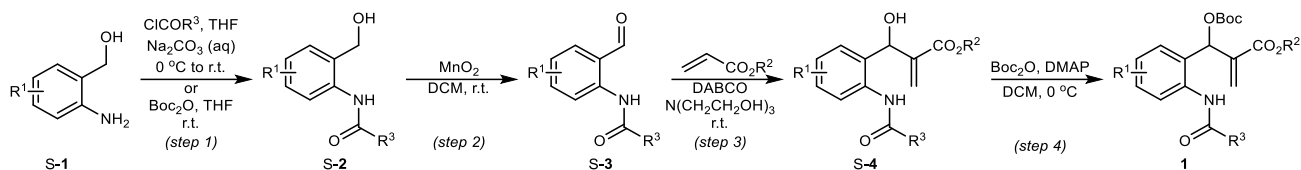

### 2.1 General procedure for the synthesis of substituted *o*-amino-acylation aryl MBH carbonates

*o*-amino-acylation aryl MBH carbonates were synthesized following the general procedure shown in the figure above. Depending on which substrates were commercially available, the starting point for the synthesis was *o*-amino benzyl alcohol (S-1) (Commercially available or reduced from *o*-amino benzoic acid<sup>1</sup>). Analogues of S-4 ( $R^1 = \text{H}$ , 5-Me, 5-Cl, 5-NO<sub>2</sub>,  $R^3 = \text{H}$ , Me, Et, Ph) have been reported earlier<sup>2</sup>. Here we broaden the scope of their substituents and made some changes in reaction conditions.

**Step 1:** When  $R^3$  refers to OMe, OEt, OAllyl, OMenthyl or Ph. To a 500 mL round-bottomed flask, S-1 (40 mmol, 1 eq.) was dissolved in THF (100 mL) was added saturated aqueous solution of sodium carbonate (150 mL), the resulting mixture was stirred at 0 °C. Then CICOR<sup>3</sup> (50 mmol, 1.25 eq.) in THF (50 mL) was added to the above solution slowly. After addition was complete, the reaction solution was allowed to gradually warm to room temperature and was stirred for 1 h. The reaction mixture was extracted with ethyl acetate (100 mL  $\times$  3). The combined organic layers were washed with a saturated aqueous solution of NaCl and dried over anhydrous Na<sub>2</sub>SO<sub>4</sub>. After filtration and evaporation, the crude product S-2 was sufficiently pure to be employed in the subsequent step.

When  $R^3$  refers to O<sup>t</sup>Bu. To a 250 mL round-bottomed flask S-1 (40 mmol) was dissolved in THF (80 mL) was added Boc<sub>2</sub>O (44 mmol) in THF (20 mL). The reaction mixture was stirred at room temperature for 24 h. The resulting was evaporated directly to obtain corresponding S-2.

**Step 2:** To a 500 mL round-bottomed flask the crude mixture from step 1 (40 mmol, 1 eq.) was dissolved in DCM (250 mL) and MnO<sub>2</sub> (400 mmol, 10 eq.) was added. The reaction was stirred at ambient temperature for 4 h. Upon full conversion, the reaction mixture was filtered through a plug of Celite and purified by column chromatography on silica gel (petroleum ether/ethyl acetate 7:1) to yield the desired product S-3.

**Step 3:** To a 50 mL round-bottomed flask a mixture of S-3 (20 mmol), acrylate (60-100 mmol, 3-5 eq., When the solubility of S-3 is poor, add more acrylate), DABCO (20 mmol, 1 eq.), and triethanolamine (16 mmol, 0.8 eq.) was stirred at room temperature until the complete consumption of the starting materials (12-24 h) monitored by TLC. The resulting mixture was purified by column chromatography on silica gel (petroleum ether/ethyl acetate 4:1) to afford the desired product S-4.

<sup>1</sup> Leth, L. A. *et al.* Decarboxylative [4+2] Cycloaddition by Synergistic Palladium and Organocatalysis. *Angew. Chem. Int. Ed.* **55**, 15272-15276 (2016). <sup>2</sup> Lee, K.-J., Lim, H. & Song, Y. Synthesis of Methyl 2-Amino-3H-1-benzazepine-4-carboxylates and 2-(Cyanomethyl)-2,3-dihydro-1H-indole-2-carboxylates from Morita-Baylis-Hillman Acetates of 2-(Acylamino)benzaldehydes. *Synthesis* **2007**, 3376-3384 (2007).



**Step 4:** To a 250 mL round-bottomed flask S-4 (20 mmol, 1 eq.) was dissolved in DCM (120 mL) and  $\text{Boc}_2\text{O}$  (22 mmol, 1.1 eq.) was added, the resulting mixture was stirred at 0 °C. Then DMAP (2 mmol, 0.1 eq.) in DCM (10 mL) was added to the above solution in one portion. The reaction was monitored by TLC until completion (10-60 min). the reaction mixture was neutralized by addition of HCl (0.5 M, 50 mL) and extracted with DCM (50 mL  $\times$  3). The combined organic layers were washed with a saturated aqueous solution of NaCl and dried over anhydrous  $\text{Na}_2\text{SO}_4$ . After filtration and evaporation, the resulting mixture was purified by column chromatography on silica gel (petroleum ether/ethyl acetate 6:1) to afford the desired product **1**.

22 kinds of substituted *o*-amino-acylation aryl MBH carbonates were prepared according to the above method (Supplementary Fig. 1).

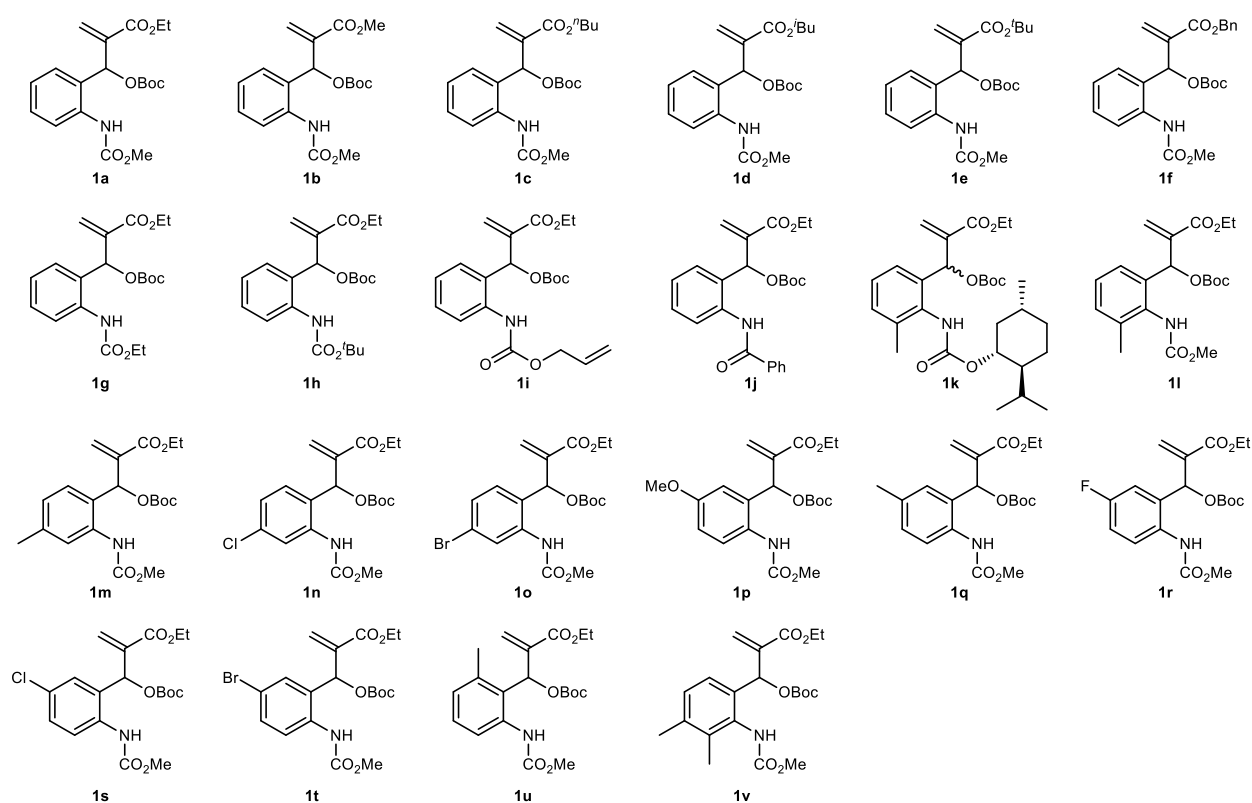

**Figure S1.** Scopes of *o*-amino-acylation aryl MBH carbonates.

## 2.2. Characterization Data of *o*-amino-acylation aryl MBH carbonates

### ethyl 2-(((tert-butoxycarbonyl)oxy)(2-((methoxycarbonyl)amino)phenyl)methyl)acrylate (1a)

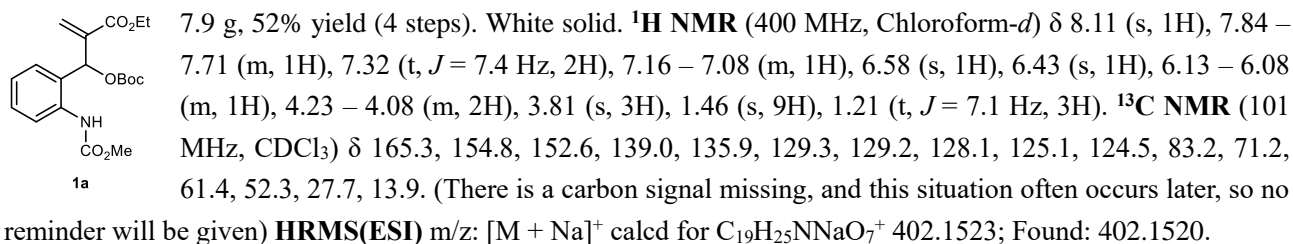

### methyl 2-(((tert-butoxycarbonyl)oxy)(2-((methoxycarbonyl)amino)phenyl)methyl)acrylate (1b)

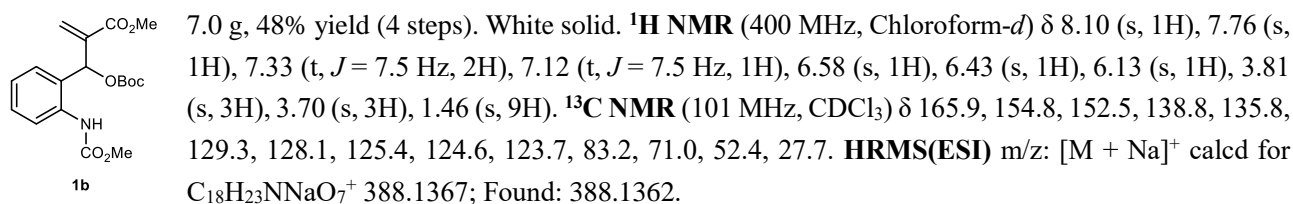

### butyl 2-(((tert-butoxycarbonyl)oxy)(2-((methoxycarbonyl)amino)phenyl)methyl)acrylate (1c)

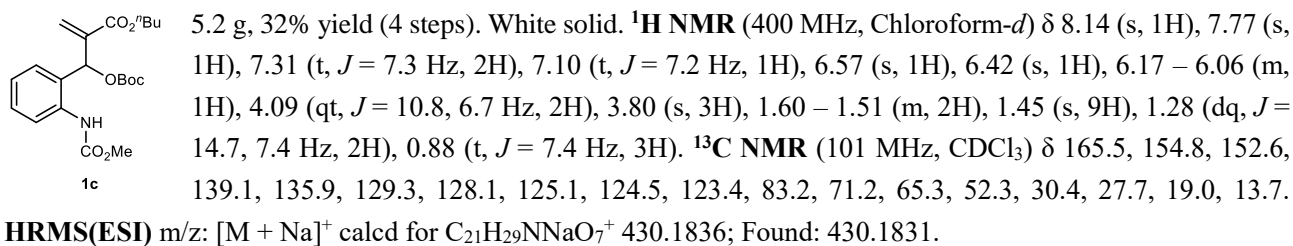

### isobutyl 2-(((tert-butoxycarbonyl)oxy)(2-((methoxycarbonyl)amino)phenyl)methyl)acrylate (1d)

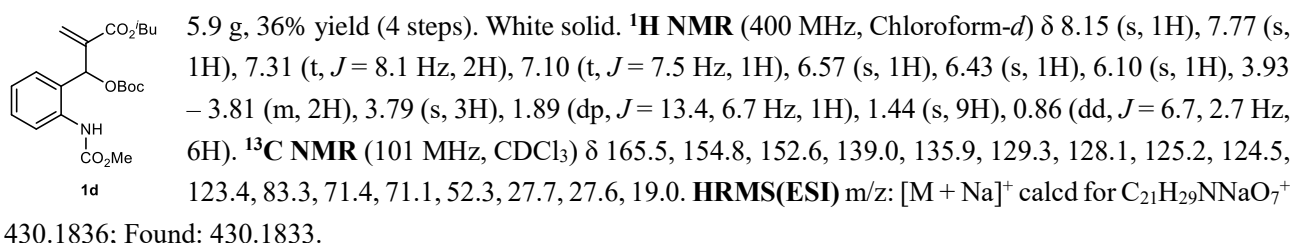

### tert-butyl 2-(((tert-butoxycarbonyl)oxy)(2-((methoxycarbonyl)amino)phenyl)methyl)acrylate (1e)

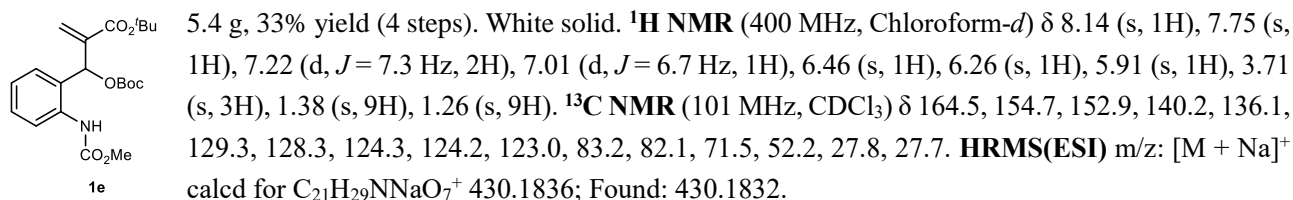

### benzyl 2-(((tert-butoxycarbonyl)oxy)(2-((methoxycarbonyl)amino)phenyl)methyl)acrylate (1f)

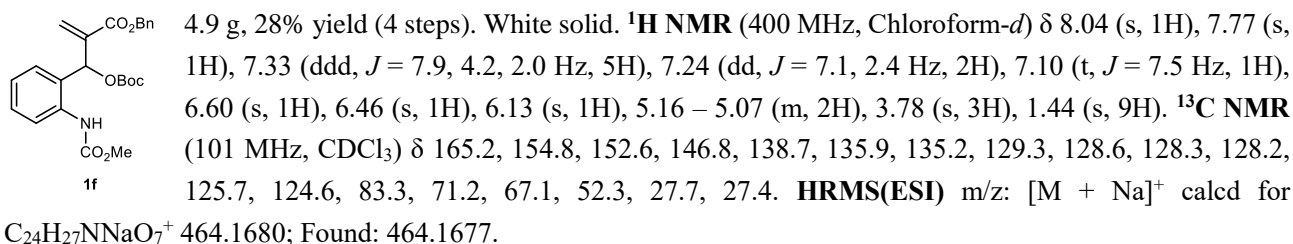

**ethyl 2-(((tert-butoxycarbonyl)oxy)(2-((ethoxycarbonyl)amino)phenyl)methyl)acrylate (1g)**

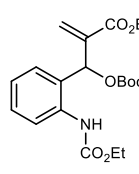  
**1g** 7.9 g, 50% yield (4 steps). White solid. <sup>1</sup>H NMR (400 MHz, Chloroform-*d*) δ 8.04 (s, 1H), 7.75 (s, 1H), 7.31 (t, *J* = 7.2 Hz, 2H), 7.10 (t, *J* = 7.5 Hz, 1H), 6.57 (s, 1H), 6.43 (s, 1H), 6.08 (s, 1H), 4.24 (q, *J* = 7.1 Hz, 2H), 4.19 – 4.07 (m, 2H), 1.45 (s, 9H), 1.34 (t, *J* = 7.1 Hz, 3H), 1.20 (t, *J* = 7.1 Hz, 3H). <sup>13</sup>C NMR (101 MHz, CDCl<sub>3</sub>) δ 165.3, 154.4, 152.6, 139.0, 136.0, 129.2, 128.2, 125.1, 124.4, 123.7, 123.6, 83.2, 71.3, 61.4, 61.2, 27.7, 14.6, 13.9. HRMS(ESI) *m/z*: [M + Na]<sup>+</sup> calcd for C<sub>20</sub>H<sub>27</sub>NNaO<sub>7</sub><sup>+</sup> 416.1680; Found: 416.1675.

**ethyl 2-((2-((tert-butoxycarbonyl)amino)phenyl)((tert-butoxycarbonyl)oxy)methyl)acrylate (1h)**

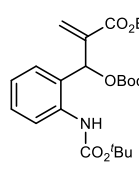  
**1h** 9.3 g, 55% yield (4 steps). White solid. <sup>1</sup>H NMR (400 MHz, Chloroform-*d*) δ 7.81 – 7.67 (m, 2H), 7.31 (t, *J* = 7.6 Hz, 2H), 7.14 – 7.05 (m, 1H), 6.59 (s, 1H), 6.44 (s, 1H), 6.12 – 6.02 (m, 1H), 4.24 – 4.07 (m, 2H), 1.55 (s, 9H), 1.47 (s, 9H), 1.22 (t, *J* = 7.1 Hz, 3H). <sup>13</sup>C NMR (101 MHz, CDCl<sub>3</sub>) δ 165.2, 153.5, 152.5, 139.0, 136.3, 129.1, 128.2, 125.1, 124.1, 123.7, 83.1, 80.2, 71.4, 61.3, 28.4, 27.7, 13.9. HRMS(ESI) *m/z*: [M + Na]<sup>+</sup> calcd for C<sub>22</sub>H<sub>31</sub>NNaO<sub>7</sub><sup>+</sup> 444.1993; Found: 444.1987.

**ethyl 2-((2-(((allyloxy)carbonyl)amino)phenyl)((tert-butoxycarbonyl)oxy)methyl)acrylate (1i)**

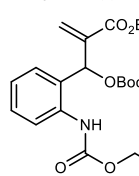  
**1i** 7.6 g, 47% yield (4 steps). White solid. <sup>1</sup>H NMR (400 MHz, Chloroform-*d*) δ 8.03 (s, 1H), 7.68 (s, 1H), 7.23 (t, *J* = 7.6 Hz, 2H), 7.03 (t, *J* = 7.4 Hz, 1H), 6.50 (s, 1H), 6.35 (s, 1H), 6.01 (s, 1H), 5.93 (ddt, *J* = 16.2, 10.8, 5.6 Hz, 1H), 5.30 (d, *J* = 17.1 Hz, 1H), 5.17 (d, *J* = 10.3 Hz, 1H), 4.62 (d, *J* = 5.5 Hz, 2H), 4.13 – 3.98 (m, 2H), 1.37 (s, 9H), 1.11 (t, *J* = 7.1 Hz, 3H). <sup>13</sup>C NMR (101 MHz, CDCl<sub>3</sub>) δ 165.3, 154.0, 152.6, 139.0, 135.9, 132.8, 129.2, 128.2, 125.1, 124.6, 123.6, 117.8, 83.2, 71.2, 65.9, 65.8, 61.4, 27.7, 13.9. HRMS(ESI) *m/z*: [M + Na]<sup>+</sup> calcd for C<sub>21</sub>H<sub>27</sub>NNaO<sub>7</sub><sup>+</sup> 428.1680; Found: 428.1676.

**ethyl 2-((2-benzamidophenyl)((tert-butoxycarbonyl)oxy)methyl)acrylate (1j)**

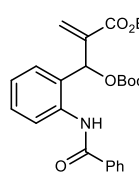  
**1j** 3.2 g, 19% yield (4 steps). White solid. <sup>1</sup>H NMR (400 MHz, Chloroform-*d*) δ 9.80 (s, 1H), 8.12 (d, *J* = 7.6 Hz, 2H), 8.04 (d, *J* = 7.5 Hz, 1H), 7.62 – 7.50 (m, 3H), 7.44 – 7.37 (m, 2H), 7.24 – 7.16 (m, 1H), 6.68 (s, 1H), 6.45 (s, 1H), 6.16 (s, 1H), 4.14 (dtt, *J* = 13.5, 7.0, 3.6 Hz, 2H), 1.47 (d, *J* = 2.6 Hz, 9H), 1.18 (td, *J* = 7.1, 2.7 Hz, 3H). <sup>13</sup>C NMR (101 MHz, CDCl<sub>3</sub>) δ 165.5, 165.5, 152.8, 139.0, 135.8, 134.7, 131.8, 129.3, 129.0, 128.7, 128.3, 127.5, 125.3, 125.0, 125.0, 83.5, 71.4, 61.5, 27.7, 13.9. HRMS(ESI) *m/z*: [M + Na]<sup>+</sup> calcd for C<sub>24</sub>H<sub>27</sub>NNaO<sub>6</sub><sup>+</sup> 448.1730; Found: 448.1726.

**ethyl 2-(((tert-butoxycarbonyl)oxy)(2-((((1R,2S,5R)-2-isopropyl-5-methylcyclohexyl)oxy)carbonyl)amino)-3-methylphenyl)methyl)acrylate (1k)**

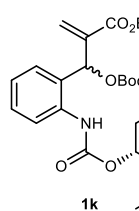  
**1k** 4.6 g, 23% yield (4 steps). Colorless viscous oil. <sup>1</sup>H NMR (400 MHz, Chloroform-*d*) δ 7.82 (d, *J* = 11.4 Hz, 2H), 7.30 (t, *J* = 6.9 Hz, 2H), 7.08 (t, *J* = 7.5 Hz, 1H), 6.58 (d, *J* = 7.1 Hz, 1H), 6.42 (d, *J* = 3.7 Hz, 1H), 6.05 (s, 1H), 4.68 (tt, *J* = 10.5, 4.6 Hz, 1H), 4.13 (dddt, *J* = 14.8, 10.8, 7.3, 3.8 Hz, 2H), 2.17 – 2.10 (m, 1H), 2.07 – 1.99 (m, 1H), 1.69 (d, *J* = 11.2 Hz, 2H), 1.53 (s, 3H), 1.47 – 1.39 (m, 10H), 1.28 – 1.03 (m, 6H), 0.93 (d, *J* = 6.5 Hz, 6H), 0.83 (dd, *J* = 6.9, 3.1 Hz, 3H). <sup>13</sup>C NMR (101 MHz, CDCl<sub>3</sub>) δ 165.2, 154.2, 152.5, 146.7, 138.9, 138.9, 136.2, 129.2, 129.2, 128.4, 128.2, 125.2, 125.1, 124.2, 123.5, 83.1, 75.1, 75.0, 71.6, 71.5, 61.3, 47.3, 47.2, 41.4, 41.3, 34.3, 31.4, 31.4, 27.7, 27.7, 27.4, 26.4, 26.3, 23.7, 23.6, 22.1, 20.8, 20.8, 16.6, 16.6, 13.9, 13.9. HRMS(ESI) *m/z*: [M + Na]<sup>+</sup> calcd for C<sub>28</sub>H<sub>41</sub>NNaO<sub>7</sub><sup>+</sup> 526.2775; Found: 526.2770.

**ethyl 2-(((tert-butoxycarbonyl)oxy)(2-((methoxycarbonyl)amino)-3-methylphenyl)methyl)acrylate (1l)**

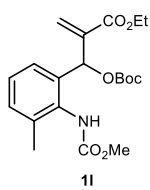

5.7 g, 36% yield (4 steps). White solid.  $^1\text{H NMR}$  (400 MHz, Chloroform-*d*)  $\delta$  7.57 (s, 1H), 7.22 (dt,  $J = 14.7, 6.7$  Hz, 3H), 6.71 (s, 1H), 6.45 (s, 1H), 6.08 (s, 1H), 4.17 (dtd,  $J = 10.8, 7.1, 3.7$  Hz, 2H), 3.82 (s, 3H), 2.35 (s, 3H), 1.48 (s, 9H), 1.23 (t,  $J = 7.1$  Hz, 3H).  $^{13}\text{C NMR}$  (101 MHz,  $\text{CDCl}_3$ )  $\delta$  165.2, 154.6, 152.6, 139.3, 136.8, 133.8, 133.7, 131.3, 126.9, 125.8, 125.1, 82.9, 71.6, 61.2, 52.4, 27.7, 18.5, 14.0. **HRMS(ESI)**  $m/z$ :  $[\text{M} + \text{Na}]^+$  calcd for  $\text{C}_{20}\text{H}_{27}\text{NNaO}_7^+$  416.1680; Found: 416.1676.

**ethyl 2-(((tert-butoxycarbonyl)oxy)(2-((methoxycarbonyl)amino)-4-methylphenyl)methyl)acrylate (1m)**

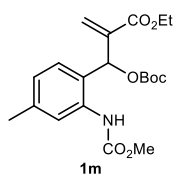

7.2 g, 46% yield (4 steps). White solid.  $^1\text{H NMR}$  (400 MHz, Chloroform-*d*)  $\delta$  8.12 (s, 1H), 7.60 (s, 1H), 7.21 (d,  $J = 8.0$  Hz, 1H), 6.93 (d,  $J = 7.8$  Hz, 1H), 6.55 (s, 1H), 6.42 (s, 1H), 6.10 (s, 1H), 4.15 (qt,  $J = 10.7, 5.4$  Hz, 2H), 3.81 (s, 3H), 2.34 (s, 3H), 1.46 (s, 9H), 1.21 (t,  $J = 7.1$  Hz, 3H).  $^{13}\text{C NMR}$  (101 MHz,  $\text{CDCl}_3$ )  $\delta$  165.4, 154.8, 152.7, 139.4, 139.1, 135.7, 128.0, 125.5, 124.9, 124.0, 83.1, 71.1, 61.4, 52.3, 27.7, 21.4, 13.9. **HRMS(ESI)**  $m/z$ :  $[\text{M} + \text{Na}]^+$  calcd for  $\text{C}_{20}\text{H}_{27}\text{NNaO}_7^+$  416.1680; Found: 416.1677.

**ethyl 2-(((tert-butoxycarbonyl)oxy)(4-chloro-2-((methoxycarbonyl)amino)phenyl)methyl)acrylate (1n)**

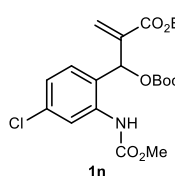

8.1 g, 49% yield (4 steps). White solid.  $^1\text{H NMR}$  (400 MHz, Chloroform-*d*)  $\delta$  8.24 (s, 1H), 7.86 (s, 1H), 7.24 (d,  $J = 8.4$  Hz, 1H), 7.07 (dd,  $J = 8.4, 2.0$  Hz, 1H), 6.50 (s, 1H), 6.44 (s, 1H), 6.15 – 6.10 (m, 1H), 4.25 – 4.06 (m, 2H), 3.81 (s, 3H), 1.45 (s, 9H), 1.21 (t,  $J = 7.1$  Hz, 3H).  $^{13}\text{C NMR}$  (101 MHz,  $\text{CDCl}_3$ )  $\delta$  165.3, 154.4, 152.5, 138.7, 137.1, 135.0, 129.2, 126.6, 125.3, 124.6, 123.0, 83.5, 70.5, 61.5, 52.5, 27.7, 13.9. **HRMS(ESI)**  $m/z$ :  $[\text{M} + \text{Na}]^+$  calcd for  $\text{C}_{19}\text{H}_{24}\text{ClNNaO}_7^+$  436.1133; Found: 436.1130.

**ethyl 2-((4-bromo-2-((methoxycarbonyl)amino)phenyl)((tert-butoxycarbonyl)oxy)methyl)acrylate (1o)**

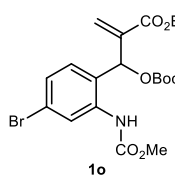

6.4 g, 35% yield (4 steps). White solid.  $^1\text{H NMR}$  (400 MHz, Chloroform-*d*)  $\delta$  8.16 (s, 1H), 7.94 (s, 1H), 7.17 – 7.13 (m, 1H), 7.10 (d,  $J = 8.4$  Hz, 1H), 6.42 (s, 1H), 6.36 (s, 1H), 6.05 (s, 1H), 4.06 (qt,  $J = 10.8, 5.4$  Hz, 2H), 3.73 (s, 3H), 1.38 (s, 9H), 1.14 (t,  $J = 7.1$  Hz, 3H).  $^{13}\text{C NMR}$  (101 MHz,  $\text{CDCl}_3$ )  $\delta$  165.3, 154.4, 152.5, 146.8, 138.6, 137.2, 129.5, 127.5, 126.1, 125.3, 123.0, 83.5, 70.5, 61.5, 52.5, 27.7, 13.9. **HRMS(ESI)**  $m/z$ :  $[\text{M} + \text{Na}]^+$  calcd for  $\text{C}_{19}\text{H}_{24}\text{BrNNaO}_7^+$  480.0628; Found: 480.0624.

**ethyl 2-(((tert-butoxycarbonyl)oxy)(5-methoxy-2-((methoxycarbonyl)amino)phenyl)methyl)acrylate (1p)**

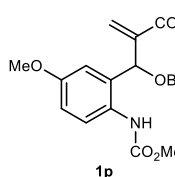

7.2 g, 44% yield (4 steps). White solid.  $^1\text{H NMR}$  (400 MHz, Chloroform-*d*)  $\delta$  7.84 (s, 1H), 7.53 (s, 1H), 6.80 (dd,  $J = 15.4, 5.9$  Hz, 2H), 6.53 – 6.47 (m, 1H), 6.37 (d,  $J = 5.6$  Hz, 1H), 6.03 (d,  $J = 5.0$  Hz, 1H), 4.08 (q,  $J = 7.4$  Hz, 2H), 3.76 – 3.65 (m, 6H), 1.39 (d,  $J = 7.9$  Hz, 9H), 1.14 (q,  $J = 7.2$  Hz, 3H).  $^{13}\text{C NMR}$  (101 MHz,  $\text{CDCl}_3$ )  $\delta$  165.2, 156.7, 155.2, 152.5, 139.0, 130.6, 128.8, 125.7, 125.2, 114.7, 113.1, 83.2, 70.9, 61.3, 55.4, 52.2, 27.7, 13.9. **HRMS(ESI)**  $m/z$ :  $[\text{M} + \text{Na}]^+$  calcd for  $\text{C}_{20}\text{H}_{27}\text{NNaO}_8^+$  432.1629; Found: 432.1624.

**ethyl 2-(((tert-butoxycarbonyl)oxy)(2-((methoxycarbonyl)amino)-5-methylphenyl)methyl)acrylate (1q)**

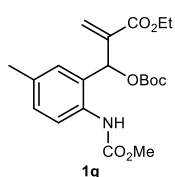

8.0 g, 51% yield (4 steps). White solid.  $^1\text{H NMR}$  (400 MHz, Chloroform-*d*)  $\delta$  8.14 (s, 1H), 7.73 (s, 1H), 7.25 (d,  $J = 8.3$  Hz, 2H), 6.68 (s, 1H), 6.55 (s, 1H), 6.22 (s, 1H), 4.34 – 4.20 (m, 2H), 3.92 (s, 3H), 2.42 (s, 3H), 1.59 (s, 9H), 1.33 (t,  $J = 7.1$  Hz, 3H).  $^{13}\text{C NMR}$  (101 MHz,  $\text{CDCl}_3$ )  $\delta$  165.4, 155.0, 152.6, 149.8, 139.1, 133.3, 130.1, 128.4, 125.0, 123.8, 83.2, 71.2, 61.4, 52.3, 27.7, 20.9, 13.9. **HRMS(ESI)**  $m/z$ :  $[\text{M} + \text{Na}]^+$  calcd for  $\text{C}_{20}\text{H}_{27}\text{NNaO}_7^+$  416.1680; Found: 416.1676.

**ethyl 2-(((tert-butoxycarbonyl)oxy)(5-fluoro-2-((methoxycarbonyl)amino)phenyl)methyl)acrylate (1r)**

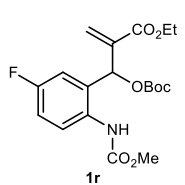**1r** 6.7 g, 42% yield (4 steps). White solid. <sup>1</sup>H NMR (400 MHz, Chloroform-*d*) δ 8.10 (s, 1H), 7.82 – 7.57 (m, 1H), 7.06 – 6.98 (m, 2H), 6.57 – 6.50 (m, 1H), 6.45 (s, 1H), 6.18 – 6.12 (m, 1H), 4.16 (tdd, *J* = 10.9, 9.0, 5.4 Hz, 2H), 3.79 (s, 3H), 1.53 (s, 3H), 1.46 (s, 9H), 1.21 (t, *J* = 7.1 Hz, 3H). <sup>13</sup>C NMR (101 MHz, CDCl<sub>3</sub>) δ 165.2, 155.0, 152.4, 146.7, 138.7, 131.8, 125.4, 116.2 (d, *J* = 22.3 Hz), 114.4 (d, *J* = 23.5 Hz), 85.2, 83.5, 70.4, 61.5, 52.4, 27.7, 27.4, 13.9. <sup>19</sup>F NMR (377 MHz, Chloroform-*d*) δ -117.25. HRMS(ESI) *m/z*: [M + Na]<sup>+</sup> calcd for C<sub>19</sub>H<sub>24</sub>FNNaO<sub>7</sub><sup>+</sup> 420.1429; Found: 420.1424.

**ethyl 2-(((tert-butoxycarbonyl)oxy)(5-chloro-2-((methoxycarbonyl)amino)phenyl)methyl)acrylate (1s)**

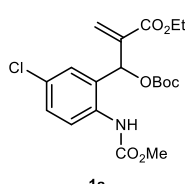**1s** 7.3 g, 44% yield (4 steps). White solid. <sup>1</sup>H NMR (400 MHz, Chloroform-*d*) δ 8.17 (s, 1H), 7.72 (s, 1H), 7.27 (d, *J* = 6.8 Hz, 2H), 6.50 (s, 1H), 6.46 (s, 1H), 6.17 – 6.12 (m, 1H), 4.22 – 4.08 (m, 2H), 3.80 (s, 3H), 1.46 (s, 9H), 1.22 (t, *J* = 7.1 Hz, 3H). <sup>13</sup>C NMR (101 MHz, CDCl<sub>3</sub>) δ 165.3, 154.7, 152.4, 138.6, 134.5, 129.7, 129.4, 127.9, 125.6, 124.9, 83.6, 70.3, 61.6, 52.4, 27.7, 13.9. HRMS(ESI) *m/z*: [M + Na]<sup>+</sup> calcd for C<sub>19</sub>H<sub>24</sub>ClNNaO<sub>7</sub><sup>+</sup> 436.1133; Found: 436.1128.

**ethyl 2-((5-bromo-2-((methoxycarbonyl)amino)phenyl)((tert-butoxycarbonyl)oxy)methyl)acrylate (1t)**

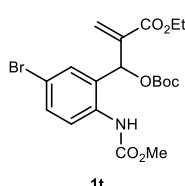**1t** 5.7 g, 31% yield (4 steps). White solid. <sup>1</sup>H NMR (400 MHz, Chloroform-*d*) δ 8.15 (s, 1H), 7.67 (s, 1H), 7.41 (d, *J* = 8.0 Hz, 2H), 6.50 (s, 1H), 6.46 (s, 1H), 6.14 (s, 1H), 4.16 (qd, *J* = 10.9, 5.5 Hz, 2H), 3.80 (s, 3H), 1.46 (s, 9H), 1.22 (t, *J* = 7.1 Hz, 3H). <sup>13</sup>C NMR (101 MHz, CDCl<sub>3</sub>) δ 165.2, 154.6, 152.4, 138.6, 135.0, 132.2, 130.8, 130.6, 125.6, 125.1, 117.3, 83.6, 70.3, 61.6, 52.4, 27.7, 13.9. HRMS(ESI) *m/z*: [M + Na]<sup>+</sup> calcd for C<sub>19</sub>H<sub>24</sub>BrNNaO<sub>7</sub><sup>+</sup> 480.0628; Found: 480.0623.

**ethyl 2-(((tert-butoxycarbonyl)oxy)(2-((methoxycarbonyl)amino)-6-methylphenyl)methyl)acrylate (1u)**

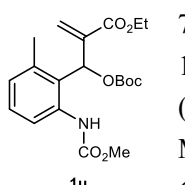**1u** 7.5 g, 48% yield (4 steps). White solid. <sup>1</sup>H NMR (400 MHz, Chloroform-*d*) δ 7.67 (s, 1H), 7.58 (s, 1H), 7.23 (t, *J* = 7.9 Hz, 1H), 6.94 (d, *J* = 7.5 Hz, 1H), 6.90 (s, 1H), 6.39 (s, 1H), 5.68 (s, 1H), 4.18 (q, *J* = 7.1 Hz, 2H), 3.75 (s, 3H), 2.45 (s, 3H), 1.46 (s, 9H), 1.25 (t, *J* = 7.1 Hz, 3H). <sup>13</sup>C NMR (101 MHz, CDCl<sub>3</sub>) δ 165.3, 154.6, 152.2, 138.2, 137.3, 137.1, 129.2, 127.2, 126.9, 121.6, 83.1, 72.2, 61.2, 52.3, 27.7, 20.2, 14.0. HRMS(ESI) *m/z*: [M + Na]<sup>+</sup> calcd for C<sub>20</sub>H<sub>27</sub>NNaO<sub>7</sub><sup>+</sup> 416.1680; Found: 416.1675.

**ethyl 2-(((tert-butoxycarbonyl)oxy)(2-((methoxycarbonyl)amino)-3,4-dimethylphenyl)methyl)acrylate (1v)**

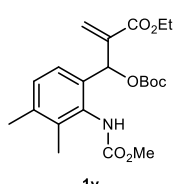**1v** 8.0 g, 49% yield (4 steps). White solid. <sup>1</sup>H NMR (400 MHz, Chloroform-*d*) δ 7.51 (s, 1H), 7.08 (q, *J* = 7.9 Hz, 2H), 6.64 (s, 1H), 6.39 (s, 1H), 6.03 (s, 1H), 4.13 (q, *J* = 7.0 Hz, 2H), 3.83 – 3.63 (m, 3H), 2.27 (s, 3H), 2.18 (s, 3H), 1.44 (s, 9H), 1.19 (t, *J* = 7.0 Hz, 3H). <sup>13</sup>C NMR (101 MHz, CDCl<sub>3</sub>) δ 165.2, 154.9, 152.7, 139.3, 138.6, 135.3, 133.6, 131.2, 128.6, 125.1, 124.9, 82.8, 71.9, 61.1, 52.4, 27.7, 20.6, 15.0, 14.0. HRMS(ESI) *m/z*: [M + Na]<sup>+</sup> calcd for C<sub>21</sub>H<sub>29</sub>NNaO<sub>7</sub><sup>+</sup> 430.1836; Found: 430.1831.

### 3. General Procedure of Optimization and Substrate Scope

#### 3.1. General procedure 1 (GP1) for the synthesis of benzodiazocine

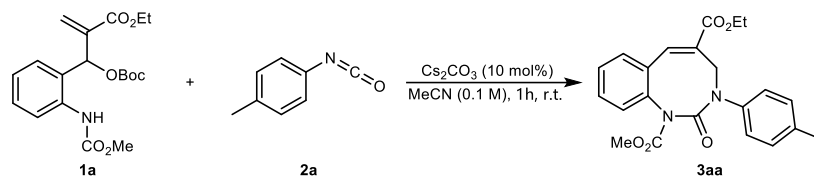

*o*-amino-acylation aryl MBH carbonate **1a** (0.1 mmol, 1.0 eq.) and isocyanate **2a** (0.2 mmol, 2.0 eq.) and MeCN (0.5 mL) were added to a dry flask at room temperature, then  $\text{Cs}_2\text{CO}_3$  (0.01 mmol, 0.1 eq.) in MeCN (0.5 mL) was added to the above solution in one portion. This solution was stirred at until the complete consumption of the starting materials monitored by TLC. After the removal of the solvent, the residue was purified by flash column chromatography (petroleum ether/ethyl acetate 3:1) to afford product **3aa**.

#### 3.2. Optimization of intermolecular cycloaddition reaction conditions

Table S1 | Optimization of intermolecular cycloaddition on **1a** and **2a**

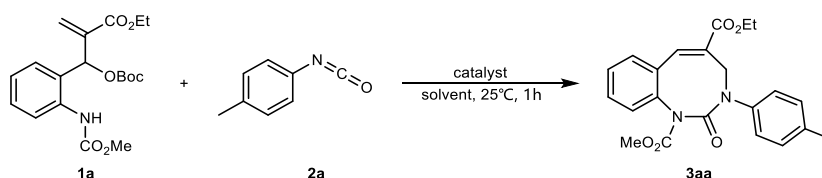

| Entry | 1a (mmol) | 2a (mmol) | Solvent <sup>a</sup> | Catalyst <sup>b</sup>                             | Yield of 3aa (%) <sup>c</sup> |
|-------|-----------|-----------|----------------------|---------------------------------------------------|-------------------------------|
| 1     | 0.1       | 0.1       | MeCN                 | —                                                 | no reaction                   |
| 2     | 0.1       | 0.1       | MeCN                 | $\text{Cs}_2\text{CO}_3$                          | 62                            |
| 3     | 0.1       | 0.12      | MeCN                 | $\text{Cs}_2\text{CO}_3$                          | 73                            |
| 4     | 0.1       | 0.15      | MeCN                 | $\text{Cs}_2\text{CO}_3$                          | 79                            |
| 5     | 0.1       | 0.2       | MeCN                 | $\text{Cs}_2\text{CO}_3$                          | <b>91</b>                     |
| 6     | 0.1       | 0.2       | toluene              | $\text{Cs}_2\text{CO}_3$                          | no reaction                   |
| 7     | 0.1       | 0.2       | $\text{CHCl}_3$      | $\text{Cs}_2\text{CO}_3$                          | no reaction                   |
| 8     | 0.1       | 0.2       | EtOAc                | $\text{Cs}_2\text{CO}_3$                          | no reaction                   |
| 9     | 0.1       | 0.2       | THF                  | $\text{Cs}_2\text{CO}_3$                          | no reaction                   |
| 10    | 0.1       | 0.2       | MeCN                 | NaOAc                                             | 43                            |
| 11    | 0.1       | 0.2       | MeCN                 | $\text{Na}_2\text{CO}_3$                          | 67                            |
| 12    | 0.1       | 0.2       | MeCN                 | $\text{K}_2\text{CO}_3$                           | 86                            |
| 13    | 0.1       | 0.2       | MeCN                 | $\text{Ru}_2\text{CO}_3$                          | 90                            |
| 14    | 0.1       | 0.2       | MeCN                 | $\text{K}_3\text{PO}_4 \cdot 3\text{H}_2\text{O}$ | 75                            |
| 15    | 0.1       | 0.2       | MeCN                 | $\text{Et}_3\text{N}$                             | mess                          |
| 16    | 0.1       | 0.2       | $\text{CHCl}_3$      | quinine                                           | no reaction                   |

17

0.1

0.2

CHCl<sub>3</sub>PPh<sub>3</sub>

no reaction

<sup>a</sup> 1 mL, <sup>b</sup> 0.01 mmol, <sup>c</sup> Isolated yield.

## 4. Gram scale reactions and synthetic transformations

### 4.1. Gram scale reactions

#### Synthesis of benzodiazocine **3aa**

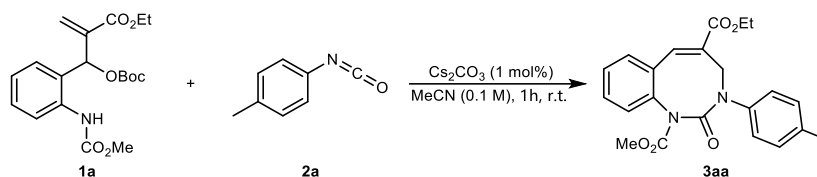

*o*-amino-acylation aryl MBH carbonate **1a** (1.52g, 4 mmol, 1.0 eq.) and isocyanate **2a** (1.01 mL, 8 mmol, 2.0 eq.) and MeCN (35 mL) were added to a 100 mL dry flask at room temperature, then Cs<sub>2</sub>CO<sub>3</sub> (13.0 mg, 0.04 mmol, 0.01 eq.) in MeCN (5 mL) was added to the above solution in one portion. The resulting solution of the reaction mixture was stirred at room temperature for 1 h. The solvent was evaporated to give the crude product, which was directly purified by flash chromatography (petroleum ether/ethyl acetate 3:1) to provide the desired product **3aa** as a white solid (1.43 g, 91% yield). The analytical data of the gram scale reaction of **3aa** are consistent with those of the 0.1 mmol scale experiment.

### 4.2. Synthetic transformations

#### **3aa** to **4a** (3+2 cycloaddition)

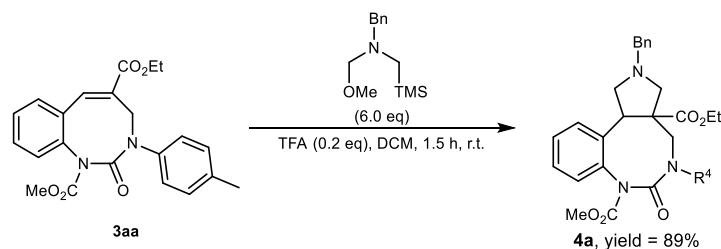

To a stirred solution of **3aa** (39.4 mg, 0.1 mmol, 1.0 eq.) and N-(Methoxymethyl)-N-(trimethylsilylmethyl)benzylamine (142.4 mg, 0.6 mmol, 6.0 eq.) in 1 mL DCM was added TFA (1.5  $\mu$ L, 0.02 mmol, 0.2 eq.). The resulting solution of the reaction mixture was stirred at room temperature for 1.5 h then evaporated to give the crude product, which was purified by flash chromatography (petroleum ether/ethyl acetate 2:1) to provide the desired product **4a** (38.8 mg, 89% yield).

#### **3aa** to **4b** (Removal of CO<sub>2</sub>Me)

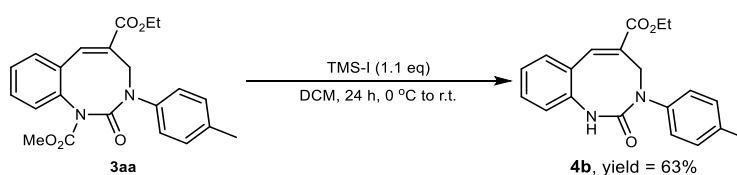

To a stirred solution of **3aa** (39.4 mg, 0.1 mmol, 1.0 eq.) in 1 mL DCM was added TMS-I (22.0 mg, 0.11 mmol, 1.1 eq.) in one portion at 0 °C. Then the reaction was allowed to warm up to ambient temperature slowly. The resulting solution of the reaction mixture was stirred at room temperature for 24 h then evaporated to give the crude product, which was purified by flash chromatography (petroleum ether/ethyl acetate 2:1) to provide the desired product **4b** (23.6 mg, 63% yield).

#### 4b to 4c (Rearrangement)

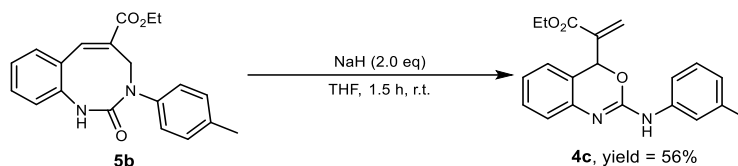

**4b** (33.6 mg, 0.1 mmol, 1.0 eq.) and NaH (4.8 mg, 0.2 mmol, 2.0 eq.) were added to 1 mL dry THF and stirred at room temperature for 1.5 h.  $\text{NH}_4\text{Cl}$  (aq) was added in small portions. Then, extracted with ethyl acetate, and dried with  $\text{Na}_2\text{SO}_4$  and concentrated in vacuo. The crude product was purified by flash chromatography (petroleum ether/ethyl acetate 2:1) to provide the desired product **4c** (18.8 mg, 56% yield).

#### 3ab to 4d (Removal of *p*-methoxyphenyl)

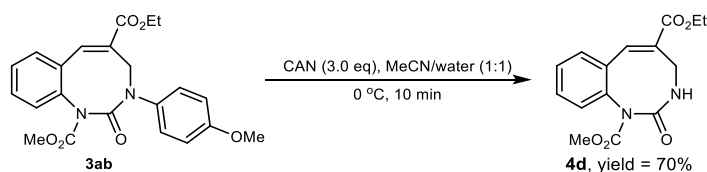

To a stirred solution of **3ab** (41.0 mg, 0.1 mmol, 1.0 eq.) in 1 mL MeCN was added solution of CAN (164.5 mg, 0.3 mmol, 3.0 eq.) in 1 mL  $\text{H}_2\text{O}$  dropwise at 0 °C. The reaction mixture was stirred for 10 min then extracted with ethyl acetate (1 mL  $\times$  3). The combined organic layers were washed with 5%  $\text{NaHSO}_3$  (2 mL), brine (2 mL), dried over with  $\text{Na}_2\text{SO}_4$  and concentrated in vacuo. The crude product was purified by flash chromatography (petroleum ether/ethyl acetate 2:1) to provide the desired product **4d** (21.3 mg, 70% yield).

## 5. Density Functional Theory (DFT) Calculations

### 5.1. Computational Methods

Density functional theory (DFT) investigations were performed to delineate the detailed mechanism of  $\text{CS}_2\text{CO}_3$  catalyzed [6+2] dipolar cycloaddition of *o*-amino-acylation aryl MBH carbonate with isocyanate. All DFT calculations were carried out with the Gaussian 09 programs<sup>3</sup>. The geometry optimizations of the reactants, transition states, and products were performed with the M06-2X/6-31G(d) level<sup>4</sup>. The frequency calculations were carried out at the same level to conform that there was no imaginary frequency for ground state structures and only one imaginary frequency for transition state structures. The solvent (MeCN) effects were considered by single point energy calculations on the gas-phase stationary points using M06-2X functional with the def2-TZVP<sup>5</sup> basis set in a SMD continuum solvation model. The energies given in this work are M06-2X calculated Gibbs free energies in MeCN noted on figures<sup>6</sup>. In addition, we utilized a correction of (n-m)\*1.89 kcal/mol for a process from m- to n-components to account for the Gibbs energy transition from gas to solution.



## 5.2. Calculated data

**Table S2** | The absolute calculation energies, enthalpies and free energies of [6+2] cycloaddition.

| Geometry                           | E <sub>(elec)</sub> <sup>1</sup> | E <sub>(solv)</sub> <sup>2</sup> | G <sub>(corr)</sub> <sup>3</sup> | H <sub>(corr)</sub> <sup>4</sup> | IF <sup>5</sup> |
|------------------------------------|----------------------------------|----------------------------------|----------------------------------|----------------------------------|-----------------|
| <b>1b</b>                          | -1280.262547                     | -1281.14422411                   | 0.344924                         | 0.431572                         |                 |
| <b>PhNCO</b>                       | -399.491110                      | -399.731413128                   | 0.072798                         | 0.113236                         |                 |
| <b>CO<sub>3</sub><sup>2-</sup></b> | -263.508618                      | -264.033491015                   | -0.011079                        | 0.018582                         |                 |
| <b>HCO<sub>3</sub><sup>-</sup></b> | -264.327898                      | -264.567531234                   | 0.001345                         | 0.031491                         |                 |
| <b>CO<sub>2</sub></b>              | -188.517761                      | -188.596837844                   | -0.008735                        | 0.015525                         |                 |
| <b>tBuO-</b>                       | -232.826769                      | -233.129924515                   | 0.093301                         | 0.129250                         |                 |
| <b>INT1</b>                        | -1279.705195                     | -1280.64216088                   | 0.330169                         | 0.416820                         |                 |
| <b>TS2</b>                         | -1679.193850                     | -1680.37711268                   | 0.427045                         | 0.530680                         | -121.22         |
| <b>INT2</b>                        | -1679.215516                     | -1680.40583457                   | 0.436806                         | 0.533552                         |                 |
| <b>TS3</b>                         | -1679.203402                     | -1680.38797052                   | 0.434589                         | 0.533171                         | -216.35         |
| <b>INT3</b>                        | -1679.213894                     | -1680.40228020                   | 0.435867                         | 0.535133                         |                 |
| <b>TS4</b>                         | -1679.201305                     | -1680.38459495                   | 0.433478                         | 0.533486                         | -223.33         |
| <b>3</b>                           | -1257.803355                     | -1258.62428491                   | 0.304189                         | 0.382901                         |                 |

<sup>1</sup>The electronic energy calculated by M06-2x/6-31G(d) level in gas phase. <sup>2</sup>The solvation energy corrections calculated at the M06-2x/def2-TZVP level with the SMD solvation model for acetonitrile minus electronic energy in gas phase. <sup>3</sup>The thermal correction to Gibbs free energy calculated by M06-2x/6-31G(d) level in gas phase. <sup>4</sup>The thermal correction to enthalpy calculated by M06-2x/6-31G(d) level in gas phase. <sup>5</sup>The M06-2x/6-31G(d) level calculated imaginary frequencies for the transition states.

---

<sup>3</sup> Gaussian 09, Revision D.01, Frisch, M. J.; Trucks, G. W.; Schlegel, H. B.; Scuseria, G. E.; Robb, M. A.; Cheeseman, J. R.; Scalmani, G.; Barone, V.; Mennucci, B.; Petersson, G. A.; Nakatsuji, H.; Caricato, M.; Li, X.; Hratchian, H. P.; Izmaylov, A. F.; Bloino, J.; Zheng, G.; Sonnenberg, J. L.; Hada, M.; Ehara, M.; Toyota, K.; Fukuda, R.; Hasegawa, J.; Ishida, M.; Nakajima, T.; Honda, Y.; Kitao, O.; Nakai, H.; Vreven, T.; Montgomery, Jr., J. A.; Peralta, J. E.; Ogliaro, F.; Bearpark, M.; Heyd, J. J.; Brothers, E.; Kudin, K. N.; Staroverov, V. N.; Kobayashi, R.; Normand, J.; Raghavachari, K.; Rendell, A.; Burant, J. C.; Iyengar, S. S.; Tomasi, J.; Cossi, M.; Rega, N.; Millam, N. J.; Klene, M.; Knox, J. E.; Cross, J. B.; Bakken, V.; Adamo, C.; Jaramillo, J.; Gomperts, R.; Stratmann, R. E.; Yazyev, O.; Austin, A. J.; Cammi, R.; Pomelli, C.; Ochterski, J. W.; Martin, R. L.; Morokuma, K.; Zakrzewski, V. G.; Voth, G. A.; Salvador, P.; Dannenberg, J. J.; Dapprich, S.; Daniels, A. D.; Farkas, Ö.; Foresman, J. B.; Ortiz, J. V.; Cioslowski, J.; Fox, D. J. Gaussian, Inc., Wallingford CT, **2009**.

<sup>4</sup> (a) Zhao, Y. & Truhlar, D. G. Density functionals with broad applicability in chemistry. *Acc. Chem. Res.* **41**, 157-167 (2008). (b) Zhao, Y. & Truhlar, D. G. The M06 suite of density functionals for main group thermochemistry, thermochemical kinetics, noncovalent interactions, excited states, and transition elements: Two new functionals and systematic testing of four M06-class functionals and 12 other functionals. *Theor. Chem. Acc.* **120**, 215-241 (2008). (c) Becke, A. D. Density-functional thermochemistry. III. The role of exact exchange. *J. Chem. Phys.* **98**, 5648-5652 (1993). (d) Lee, C.; Yang, W.; Parr, R. G. Development of the Colle-Salvetti correlation-energy formula into a functional of the electron density. *Phys. Rev. B* **37**, 785-789 (1988).

<sup>5</sup> Weigend, F. & Ahlrichs, R. Balanced basis sets of split valence, triple zeta valence and quadruple zeta valence quality for H to Rn: Design and assessment of accuracy. *Phys. Chem. Chem. Phys.* **7**, 3297-305 (2005).

<sup>6</sup> Marenich, A. V.; Cramer, C. J.; Truhlar, D. G., Universal Solvation Model Based on Solute Electron Density and on a Continuum Model of the Solvent Defined by the Bulk Dielectric Constant and Atomic Surface Tensions. *J. Phys. Chem. B.* 2009, **113**, 6378-6396.

## 6. Analytical Data

### 6.1. Cs<sub>2</sub>CO<sub>3</sub> catalyzed [6+2] cycloadducts 3

#### 5-ethyl 1-methyl (E)-2-oxo-3-(p-tolyl)-3,4-dihydrobenzo[d][1,3]diazocine-1,5(2H)-dicarboxylate (**3aa**)

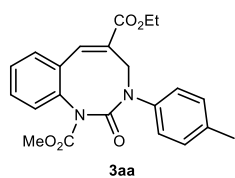

The reaction was conducted on a 0.1 mmol scale according to the GP1 and afforded benzodiazocine **3aa** as white solid (35.9 mg, 91% yield, mp: 53-55 °C).  $R_f$  = 0.4 (petroleum ether/ethyl acetate = 3:1). <sup>1</sup>H NMR (400 MHz, Chloroform-*d*)  $\delta$  7.87 (s, 1H), 7.55 (dd,  $J$  = 7.7, 1.4 Hz, 1H), 7.52 – 7.40 (m, 3H), 7.21 – 7.11 (m, 4H), 4.87 (s, 1H), 4.52 (s, 1H), 4.27 (q,  $J$  = 7.1 Hz, 2H), 3.84 (s, 3H), 2.32 (s, 3H), 1.32 (t,  $J$  = 7.1 Hz, 3H). <sup>13</sup>C NMR (101 MHz, CDCl<sub>3</sub>)  $\delta$  166.8, 153.8, 153.8, 140.7, 139.9, 137.2, 136.3, 134.2, 132.7, 131.8, 130.9, 129.8, 129.6, 129.0, 125.5, 61.7, 53.8, 50.7, 21.1, 14.3. HRMS(ESI)  $m/z$ : [M + H]<sup>+</sup> calcd for C<sub>22</sub>H<sub>23</sub>N<sub>2</sub>O<sub>5</sub><sup>+</sup> 395.1602; Found: 395.1604.

#### 5-ethyl 1-methyl (E)-3-(4-methoxyphenyl)-2-oxo-3,4-dihydrobenzo[d][1,3]diazocine-1,5(2H)-dicarboxylate (**3ab**)

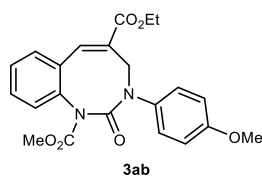

The reaction was conducted on a 0.1 mmol scale according to the GP1 and afforded benzodiazocine **3ab** as white solid (34.9 mg, 85% yield, mp: 75-77 °C).  $R_f$  = 0.4 (petroleum ether/ethyl acetate = 3:1). <sup>1</sup>H NMR (400 MHz, Chloroform-*d*)  $\delta$  7.90 (s, 1H), 7.58 (dd,  $J$  = 7.8, 1.5 Hz, 1H), 7.56 – 7.42 (m, 3H), 7.27 – 7.19 (m, 2H), 6.93 – 6.86 (m, 2H), 4.89 (s, 1H), 4.51 (s, 1H), 4.30 (q,  $J$  = 7.1 Hz, 2H), 3.87 (s, 3H), 3.81 (s, 3H), 1.35 (t,  $J$  = 7.1 Hz, 3H). <sup>13</sup>C NMR (101 MHz, CDCl<sub>3</sub>)  $\delta$  166.9, 158.6, 154.0, 153.9, 140.8, 136.4, 135.4, 134.3, 132.8, 131.9, 131.0, 129.7, 129.1, 127.1, 114.5, 61.9, 55.6, 53.9, 51.0, 14.4. HRMS(ESI)  $m/z$ : [M + H]<sup>+</sup> calcd for C<sub>22</sub>H<sub>23</sub>N<sub>2</sub>O<sub>6</sub><sup>+</sup> 411.1551; Found: 411.1553.

#### 5-ethyl 1-methyl (E)-3-(4-fluorophenyl)-2-oxo-3,4-dihydrobenzo[d][1,3]diazocine-1,5(2H)-dicarboxylate (**3ac**)

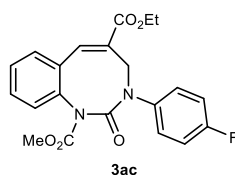

The reaction was conducted on a 0.1 mmol scale according to the GP1 and afforded benzodiazocine **3ac** as white solid (31.9 mg, 80% yield, mp: 124-126 °C).  $R_f$  = 0.4 (petroleum ether/ethyl acetate = 3:1). <sup>1</sup>H NMR (400 MHz, Chloroform-*d*)  $\delta$  7.89 (s, 1H), 7.50 (ddd,  $J$  = 29.4, 13.3, 7.4 Hz, 4H), 7.28 (dt,  $J$  = 8.0, 4.0 Hz, 2H), 7.04 (t,  $J$  = 8.4 Hz, 2H), 4.84 (s, 1H), 4.46 (s, 1H), 4.28 (q,  $J$  = 7.0 Hz, 2H), 3.83 (s, 3H), 1.33 (t,  $J$  = 7.1 Hz, 3H). <sup>13</sup>C NMR (101 MHz, CDCl<sub>3</sub>)  $\delta$  166.7, 162.6, 160.2, 153.8, 141.0, 138.6, 136.2, 134.0, 133.0, 131.9, 131.0, 129.5, 129.3, 127.8, 127.7, 116.3, 116.1, 61.9, 54.0, 50.8, 14.4. <sup>19</sup>F NMR (377 MHz, Chloroform-*d*)  $\delta$  -114.08 (tt,  $J$  = 8.7, 4.8 Hz). HRMS(ESI)  $m/z$ : [M + H]<sup>+</sup> calcd for C<sub>21</sub>H<sub>20</sub>FN<sub>2</sub>O<sub>5</sub><sup>+</sup> 399.1351; Found: 399.1351.

#### 5-ethyl 1-methyl (E)-3-(4-chlorophenyl)-2-oxo-3,4-dihydrobenzo[d][1,3]diazocine-1,5(2H)-dicarboxylate (**3ad**)

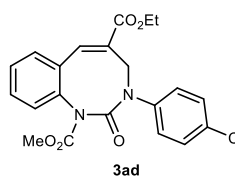

The reaction was conducted on a 0.1 mmol scale according to the GP1 and afforded benzodiazocine **3ad** as white solid (28.2 mg, 68% yield, mp: 80-82 °C).  $R_f$  = 0.4 (petroleum ether/ethyl acetate = 3:1). <sup>1</sup>H NMR (400 MHz, Chloroform-*d*)  $\delta$  7.92 (s, 1H), 7.61 – 7.53 (m, 2H), 7.52 – 7.43 (m, 2H), 7.38 (q,  $J$  = 2.1 Hz, 1H), 7.34 – 7.22 (m, 3H), 4.86 (s, 1H), 4.52 (s, 1H), 4.33 (q,  $J$  = 7.3 Hz, 2H), 3.86 (d,  $J$  = 1.8 Hz, 3H), 1.37 (t,  $J$  = 7.2 Hz, 2H). <sup>13</sup>C NMR (101 MHz, CDCl<sub>3</sub>)  $\delta$  166.5, 153.7, 153.5, 143.5, 141.1, 136.0, 134.6, 133.9, 133.0, 131.8, 130.8, 130.2, 129.3, 129.2, 127.5, 126.1, 124.0, 61.9, 53.9, 50.5, 14.3. HRMS(ESI)  $m/z$ : [M + H]<sup>+</sup> calcd for C<sub>21</sub>H<sub>20</sub>ClN<sub>2</sub>O<sub>5</sub><sup>+</sup> 415.1055; Found: 415.1055.

**5-ethyl 1-methyl (E)-3-(4-bromophenyl)-2-oxo-3,4-dihydrobenzo[d][1,3]diazocine-1,5(2H)-dicarboxylate (3ae)**

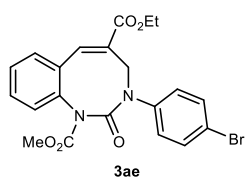

The reaction was conducted on a 0.1 mmol scale according to the GP1 and afforded benzodiazocine **3ae** as white solid (33.9 mg, 74% yield, mp: 57-59 °C).  $R_f = 0.4$  (petroleum ether/ethyl acetate = 3:1).  $^1\text{H NMR}$  (400 MHz, Chloroform-*d*)  $\delta$  7.89 (s, 1H), 7.59 – 7.38 (m, 6H), 7.22 (dd,  $J = 8.7, 1.6$  Hz, 2H), 4.84 (s, 1H), 4.49 (s, 1H), 4.29 (q,  $J = 7.3$  Hz, 2H), 3.83 (s, 3H), 1.34 (td,  $J = 7.2, 1.5$  Hz, 3H).  $^{13}\text{C NMR}$  (101 MHz,  $\text{CDCl}_3$ )  $\delta$  166.6, 153.7, 153.5, 141.5, 141.0, 136.0, 134.0, 132.9, 132.3, 131.9, 130.9, 129.3, 129.2, 127.4, 120.8, 61.9, 53.9, 50.5, 14.3. **HRMS(ESI)**  $m/z$ :  $[\text{M} + \text{H}]^+$  calcd for  $\text{C}_{21}\text{H}_{20}\text{BrN}_2\text{O}_5^+$  459.0550; Found: 459.0545.

**5-ethyl 1-methyl (E)-3-(4-cyanophenyl)-2-oxo-3,4-dihydrobenzo[d][1,3]diazocine-1,5(2H)-dicarboxylate (3af)**

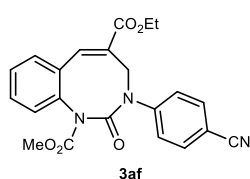

The reaction was conducted on a 0.1 mmol scale according to the GP1 and afforded benzodiazocine **3af** as white solid (16.2 mg, 40% yield, mp: 92-94 °C).  $R_f = 0.4$  (petroleum ether/ethyl acetate = 3:1).  $^1\text{H NMR}$  (400 MHz, Chloroform-*d*)  $\delta$  7.93 (s, 1H), 7.71 – 7.63 (m, 2H), 7.55 (dt,  $J = 6.6, 2.8$  Hz, 4H), 7.51 – 7.44 (m, 2H), 4.89 (s, 1H), 4.60 (s, 1H), 4.34 (q,  $J = 7.0$  Hz, 2H), 3.85 (s, 3H), 1.38 (t,  $J = 7.1$  Hz, 3H).  $^{13}\text{C NMR}$  (101 MHz,  $\text{CDCl}_3$ )  $\delta$  166.6, 153.7, 153.5, 146.4, 141.4, 135.8, 134.0, 133.2, 133.0, 132.1, 131.0, 129.5, 129.0, 126.0, 118.4, 110.5, 62.1, 54.1, 50.2, 14.4. **HRMS(ESI)**  $m/z$ :  $[\text{M} + \text{H}]^+$  calcd for  $\text{C}_{22}\text{H}_{20}\text{N}_3\text{O}_5^+$  406.1398; Found: 406.1400.

**5-ethyl 1-methyl (E)-2-oxo-3-(4-(trifluoromethoxy)phenyl)-3,4-dihydrobenzo[d][1,3]diazocine-1,5(2H)-dicarboxylate (3ag)**

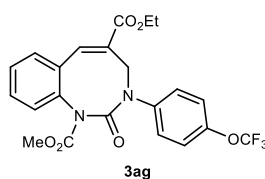

The reaction was conducted on a 0.1 mmol scale according to the GP1 and afforded benzodiazocine **3ag** as white solid (33.9 mg, 73% yield, mp: 53-55 °C).  $R_f = 0.4$  (petroleum ether/ethyl acetate = 3:1).  $^1\text{H NMR}$  (400 MHz, Chloroform-*d*)  $\delta$  7.89 (s, 1H), 7.59 – 7.41 (m, 4H), 7.41 – 7.31 (m, 2H), 7.20 (d,  $J = 8.6$  Hz, 2H), 4.85 (s, 1H), 4.49 (s, 1H), 4.30 (q,  $J = 7.1$  Hz, 2H), 3.83 (s, 3H), 1.34 (t,  $J = 7.1$  Hz, 3H).  $^{13}\text{C NMR}$  (101 MHz,  $\text{CDCl}_3$ )  $\delta$  166.5, 153.7, 153.6, 147.7 – 147.6 (m), 141.0, 141.0, 136.0, 133.8, 132.9, 131.8, 130.9, 129.3, 129.2, 127.2, 121.7, 119.1, 61.8, 53.9, 50.5, 14.2.  $^{19}\text{F NMR}$  (377 MHz, Chloroform-*d*)  $\delta$  -57.96. **HRMS(ESI)**  $m/z$ :  $[\text{M} + \text{H}]^+$  calcd for  $\text{C}_{22}\text{H}_{20}\text{F}_3\text{N}_2\text{O}_6^+$  465.1268; Found: 465.1269.

**5-ethyl 1-methyl (E)-2-oxo-3-(m-tolyl)-3,4-dihydrobenzo[d][1,3]diazocine-1,5(2H)-dicarboxylate (3ai)**

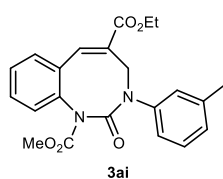

The reaction was conducted on a 0.1 mmol scale according to the GP1 and afforded benzodiazocine **3ai** as white solid (34.3 mg, 87% yield, mp: 99-101 °C).  $R_f = 0.4$  (petroleum ether/ethyl acetate = 3:1).  $^1\text{H NMR}$  (400 MHz, Chloroform-*d*)  $\delta$  7.88 (s, 1H), 7.56 (dd,  $J = 7.7, 1.6$  Hz, 1H), 7.50 (ddd,  $J = 12.8, 6.0, 2.1$  Hz, 2H), 7.46 – 7.41 (m, 1H), 7.27 – 7.23 (m, 1H), 7.12 (t,  $J = 2.1$  Hz, 1H), 7.10 – 7.05 (m, 2H), 4.87 (s, 1H), 4.53 (s, 1H), 4.28 (q,  $J = 7.2$  Hz, 2H), 3.85 (s, 3H), 2.33 (s, 3H), 1.33 (t,  $J = 7.2$  Hz, 3H).  $^{13}\text{C NMR}$  (101 MHz,  $\text{CDCl}_3$ )  $\delta$  166.8, 153.8, 153.7, 142.3, 140.7, 139.2, 136.3, 134.1, 132.8, 131.8, 130.9, 129.6, 129.1, 128.2, 126.4, 122.7, 61.7, 53.8, 50.7, 21.4, 14.3. **HRMS(ESI)**  $m/z$ :  $[\text{M} + \text{H}]^+$  calcd for  $\text{C}_{22}\text{H}_{23}\text{N}_2\text{O}_5^+$  395.1602; Found: 395.1604.

**5-ethyl 1-methyl (E)-3-(3-methoxyphenyl)-2-oxo-3,4-dihydrobenzo[d][1,3]diazocine-1,5(2H)-dicarboxylate (3aj)**

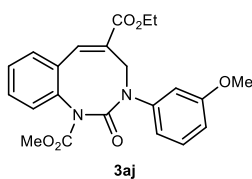

The reaction was conducted on a 0.1 mmol scale according to the GP1 and afforded benzodiazocine **3aj** as white solid (28.3 mg, 69% yield, mp: 68-70 °C).  $R_f = 0.4$  (petroleum ether/ethyl acetate = 3:1).  $^1\text{H NMR}$  (400 MHz, Chloroform-*d*)  $\delta$  7.87 (s, 1H), 7.56 (d,  $J = 7.5$  Hz, 1H), 7.53 – 7.40 (m, 3H), 7.32 – 7.22 (m, 2H), 7.01 – 6.85 (m, 2H), 4.72 (s, 1H), 4.26 (q,  $J = 7.1$  Hz, 3H), 3.84 (s, 3H), 3.68 (s, 3H), 1.32 (t,  $J = 7.1$  Hz, 3H).  $^{13}\text{C NMR}$  (101 MHz,  $\text{CDCl}_3$ )  $\delta$  166.8, 154.5, 154.0, 153.8, 140.1, 136.2, 133.7, 133.0, 131.4, 131.2, 130.8, 130.1, 129.2, 128.9, 128.4, 121.0, 112.2, 61.5, 55.6, 53.7, 50.2, 14.2. **HRMS(ESI)**  $m/z$ :  $[\text{M} + \text{H}]^+$  calcd for  $\text{C}_{22}\text{H}_{23}\text{N}_2\text{O}_6^+$  411.1551; Found: 411.1550.

**5-ethyl 1-methyl (E)-3-(3-fluorophenyl)-2-oxo-3,4-dihydrobenzo[d][1,3]diazocine-1,5(2H)-dicarboxylate (3ak)**

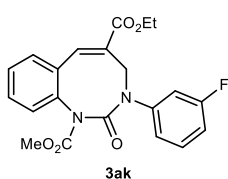

The reaction was conducted on a 0.1 mmol scale according to the GP1 and afforded benzodiazocine **3ak** as white solid (36.6 mg, 92% yield, mp: 71-73 °C).  $R_f = 0.4$  (petroleum ether/ethyl acetate = 3:1).  $^1\text{H NMR}$  (400 MHz, Chloroform-*d*)  $\delta$  7.91 (s, 1H), 7.52 (dddd,  $J = 28.9, 11.6, 7.0, 1.7$  Hz, 4H), 7.34 (td,  $J = 8.4, 6.3$  Hz, 1H), 7.18 – 7.11 (m, 2H), 6.98 (td,  $J = 8.3, 2.0$  Hz, 1H), 4.89 (s, 1H), 4.56 (s, 1H), 4.32 (p,  $J = 6.4, 5.6$  Hz, 2H), 3.86 (s, 3H), 1.36 (t,  $J = 7.2$  Hz, 3H).  $^{13}\text{C NMR}$  (101 MHz,  $\text{CDCl}_3$ )  $\delta$  166.6, 162.7 (d,  $J = 246.9$  Hz), 153.7, 153.5, 143.8 (d,  $J = 10.6$  Hz), 136.0, 134.0, 132.8, 131.9, 130.9, 130.4, 130.3, 129.3, 129.2, 121.2 (d,  $J = 3.1$  Hz), 114.3 (d,  $J = 20.5$  Hz), 113.3 (d,  $J = 23.6$  Hz), 61.9, 53.9, 50.5, 14.3.  $^{19}\text{F NMR}$  (377 MHz, Chloroform-*d*)  $\delta$  -111.20 (dd,  $J = 7.8, 6.9$  Hz). **HRMS(ESI)**  $m/z$ :  $[\text{M} + \text{H}]^+$  calcd for  $\text{C}_{21}\text{H}_{20}\text{FN}_2\text{O}_5^+$  399.1351; Found: 399.1356.

**5-ethyl 1-methyl (E)-3-(3-chlorophenyl)-2-oxo-3,4-dihydrobenzo[d][1,3]diazocine-1,5(2H)-dicarboxylate (3al)**

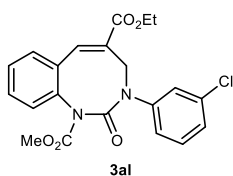

The reaction was conducted on a 0.1 mmol scale according to the GP1 and afforded benzodiazocine **3al** as white solid (21.1 mg, 51% yield, mp: 58-60 °C).  $R_f = 0.4$  (petroleum ether/ethyl acetate = 3:1).  $^1\text{H NMR}$  (400 MHz, Chloroform-*d*)  $\delta$  7.91 (s, 1H), 7.61 – 7.42 (m, 4H), 7.38 – 7.25 (m, 4H), 4.86 (s, 1H), 4.50 (s, 1H), 4.31 (q,  $J = 7.1$  Hz, 2H), 3.85 (s, 3H), 1.36 (t,  $J = 7.2$  Hz, 3H).  $^{13}\text{C NMR}$  (101 MHz,  $\text{CDCl}_3$ )  $\delta$  166.6, 153.7, 153.6, 141.0, 141.0, 136.0, 133.9, 132.9, 132.9, 131.9, 130.9, 129.8, 129.7, 129.4, 129.3, 129.3, 129.2, 127.1, 61.9, 53.9, 50.5, 14.3. **HRMS(ESI)**  $m/z$ :  $[\text{M} + \text{H}]^+$  calcd for  $\text{C}_{21}\text{H}_{20}\text{ClN}_2\text{O}_5^+$  415.1055; Found: 415.1055.

**5-ethyl 1-methyl (E)-3-(2-methoxyphenyl)-2-oxo-3,4-dihydrobenzo[d][1,3]diazocine-1,5(2H)-dicarboxylate (3am)**

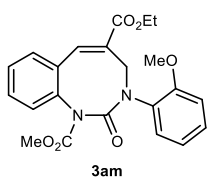

The reaction was conducted on a 0.1 mmol scale according to the GP1 and afforded benzodiazocine **3am** as white solid (36.1 mg, 88% yield, mp: 99-101 °C).  $R_f = 0.4$  (petroleum ether/ethyl acetate = 3:1).  $^1\text{H NMR}$  (400 MHz, Chloroform-*d*)  $\delta$  7.88 (s, 1H), 7.50 (ddt,  $J = 29.7, 14.5, 7.4$  Hz, 4H), 7.26 (t,  $J = 8.3$  Hz, 1H), 6.89 (d,  $J = 6.6$  Hz, 2H), 6.82 (d,  $J = 7.4$  Hz, 1H), 4.89 (s, 1H), 4.56 (s, 1H), 4.30 (q,  $J = 7.1$  Hz, 2H), 3.86 (s, 3H), 3.79 (s, 3H), 1.34 (t,  $J = 7.1$  Hz, 3H).  $^{13}\text{C NMR}$  (101 MHz,  $\text{CDCl}_3$ )  $\delta$  166.7, 160.1, 153.7, 153.6, 143.5, 140.7, 136.2, 134.2, 132.7, 131.7, 130.9, 129.9, 129.6, 129.1, 117.8, 113.1, 111.6, 61.7, 55.4, 53.8, 50.6, 14.2. **HRMS(ESI)**  $m/z$ :  $[\text{M} + \text{H}]^+$  calcd for  $\text{C}_{22}\text{H}_{23}\text{N}_2\text{O}_6^+$  411.1551; Found: 411.1553.

**5-ethyl 1-methyl (E)-2-oxo-3-(o-tolyl)-3,4-dihydrobenzo[d][1,3]diazocine-1,5(2H)-dicarboxylate (3an)**

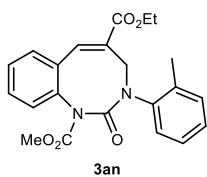

The reaction was conducted on a 0.1 mmol scale according to the GP1 and afforded benzodiazocine **3an** as white solid (34.7 mg, 88% yield, mp: 164-166 °C).  $R_f = 0.4$  (petroleum ether/ethyl acetate = 3:1).  $^1\text{H NMR}$  (400 MHz, DMSO- $d_6$ )  $\delta$  7.64 (dd,  $J = 7.5, 1.7$  Hz, 1H), 7.59 – 7.48 (m, 2H), 7.46 (dd,  $J = 7.7, 1.4$  Hz, 1H), 7.29 – 7.17 (m, 3H), 7.08 (s, 1H), 4.48 (s, 2H), 4.21 (q,  $J = 7.1$  Hz, 2H), 3.74 (s, 3H), 2.09 (s, 3H), 1.23 (t,  $J = 7.1$  Hz, 3H).  $^{13}\text{C NMR}$  (101 MHz, DMSO)  $\delta$  166.6, 153.6, 152.8, 142.1, 140.1, 136.4, 135.5, 134.2, 133.5, 131.9, 131.3, 130.9, 130.5, 129.6, 128.5, 127.4, 127.1, 61.7, 53.8, 50.5, 17.2, 14.3. **HRMS(ESI)**  $m/z$ :  $[\text{M} + \text{H}]^+$  calcd for  $\text{C}_{22}\text{H}_{23}\text{N}_2\text{O}_5^+$  395.1602; Found: 395.1609.

**5-ethyl 1-methyl (E)-3-(2-bromophenyl)-2-oxo-3,4-dihydrobenzo[d][1,3]diazocine-1,5(2H)-dicarboxylate (3ao)**

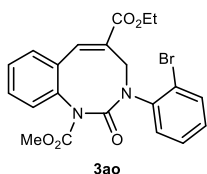

The reaction was conducted on a 0.1 mmol scale according to the GP1 and afforded benzodiazocine **3ao** as white solid (34.4 mg, 75% yield, mp: 119-121 °C).  $R_f = 0.3$  (petroleum ether/ethyl acetate = 3:1).  $^1\text{H NMR}$  (400 MHz, DMSO- $d_6$ )  $\delta$  7.84 (s, 1H), 7.67 (dd,  $J = 8.0, 1.2$  Hz, 1H), 7.61 (dd,  $J = 7.4, 1.8$  Hz, 1H), 7.58 (d,  $J = 1.8$  Hz, 2H), 7.45 (ddd,  $J = 12.8, 7.6, 1.4$  Hz, 2H), 7.36 – 7.26 (m, 2H), 4.38 (s, 2H), 4.22 (q,  $J = 7.1$  Hz, 2H), 3.72 (s, 3H), 1.24 (t,  $J = 7.1$  Hz, 3H).  $^{13}\text{C NMR}$  (101 MHz, DMSO)  $\delta$  166.3, 153.6, 152.5, 142.3, 140.7, 135.9, 134.5, 133.8, 133.1, 131.6, 131.0, 130.3, 130.1, 130.0, 129.6, 129.5, 122.0, 61.7, 53.8, 50.3, 14.4. **HRMS(ESI)**  $m/z$ :  $[\text{M} + \text{H}]^+$  calcd for  $\text{C}_{21}\text{H}_{20}\text{BrN}_2\text{O}_5^+$  459.0550; Found: 459.0554.

**5-ethyl 1-methyl (E)-3-([1,1'-biphenyl]-2-yl)-2-oxo-3,4-dihydrobenzo[d][1,3]diazocine-1,5(2H)-dicarboxylate (3ap)**

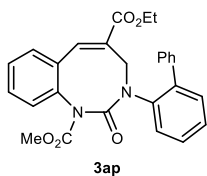

The reaction was conducted on a 0.1 mmol scale according to the GP1 and afforded benzodiazocine **3ap** as white solid (41.5 mg, 91% yield, mp: 132-134 °C).  $R_f = 0.3$  (petroleum ether/ethyl acetate = 3:1).  $^1\text{H NMR}$  (400 MHz, Chloroform- $d$ )  $\delta$  7.55 – 7.47 (m, 2H), 7.46 (d,  $J = 4.1$  Hz, 2H), 7.43 – 7.39 (m, 2H), 7.35 (dt,  $J = 5.1, 3.1$  Hz, 1H), 7.28 (d,  $J = 7.3$  Hz, 2H), 7.25 – 7.16 (m, 4H), 4.13 (q,  $J = 7.1$  Hz, 4H), 3.68 (s, 3H), 1.19 (t,  $J = 7.1$  Hz, 3H).  $^{13}\text{C NMR}$  (101 MHz, DMSO)  $\delta$  166.3, 153.8, 153.5, 140.9, 139.8, 138.8, 135.9, 134.0, 133.4, 131.7, 131.2, 130.9, 129.7, 129.3, 129.0, 128.8, 128.7, 127.8, 127.8, 61.5, 53.8, 50.6, 14.3. **HRMS(ESI)**  $m/z$ :  $[\text{M} + \text{H}]^+$  calcd for  $\text{C}_{27}\text{H}_{25}\text{N}_2\text{O}_5^+$  457.1758; Found: 457.1763.

**5-ethyl 1-methyl (E)-3-(naphthalen-1-yl)-2-oxo-3,4-dihydrobenzo[d][1,3]diazocine-1,5(2H)-dicarboxylate (3aq)**

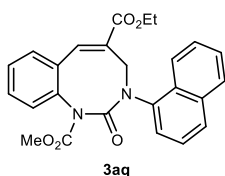

The reaction was conducted on a 0.1 mmol scale according to the GP1 and afforded benzodiazocine **3aq** as white solid (42.6 mg, 99% yield, mp: 178-180 °C).  $R_f = 0.3$  (petroleum ether/ethyl acetate = 3:1).  $^1\text{H NMR}$  (400 MHz, DMSO- $d_6$ )  $\delta$  8.01 – 7.96 (m, 1H), 7.93 (d,  $J = 8.3$  Hz, 1H), 7.88 (s, 1H), 7.85 – 7.74 (m, 1H), 7.74 – 7.68 (m, 1H), 7.64 – 7.47 (m, 6H), 7.32 (d,  $J = 6.4$  Hz, 1H), 4.65 (s, 2H), 4.14 (q,  $J = 7.1$  Hz, 2H), 3.83 (s, 3H), 1.14 (t,  $J = 7.1$  Hz, 3H).  $^{13}\text{C NMR}$  (101 MHz, DMSO)  $\delta$  166.6, 153.6, 153.5, 140.1, 139.6, 137.7, 136.5, 134.7, 133.2, 132.1, 131.0, 130.6, 129.7, 129.6, 128.9, 128.8, 127.4, 126.9, 126.2, 124.9, 122.7, 61.7, 54.0, 51.1, 14.3. **HRMS(ESI)**  $m/z$ :  $[\text{M} + \text{H}]^+$  calcd for  $\text{C}_{25}\text{H}_{23}\text{N}_2\text{O}_5^+$  431.1602; Found: 431.1607.

**5-ethyl 1-methyl (E)-3-(4-chloro-3-(trifluoromethyl)phenyl)-2-oxo-3,4-dihydrobenzo[d][1,3]diazocine-1,5(2H)-dicarboxylate (3ar)**

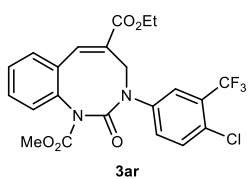

The reaction was conducted on a 0.1 mmol scale according to the GP1 and afforded benzodiazocine **3ar** as white solid (14.9 mg, 31% yield, mp: 104-106 °C).  $R_f = 0.4$  (petroleum ether/ethyl acetate = 3:1).  $^1\text{H NMR}$  (400 MHz, Chloroform-*d*)  $\delta$  7.92 (s, 1H), 7.70 (s, 1H), 7.59 – 7.41 (m, 6H), 4.81 (s, 1H), 4.47 (s, 1H), 4.32 (q,  $J = 7.1$  Hz, 2H), 3.83 (s, 3H), 1.35 (t,  $J = 7.1$  Hz, 3H).  $^{13}\text{C NMR}$  (101 MHz,  $\text{CDCl}_3$ )  $\delta$  166.3, 153.6, 153.5, 141.4, 141.3, 135.7, 133.6, 133.2, 132.2, 131.9, 130.8, 130.1, 129.4, 129.1, 129.0, 124.9 (q,  $J = 5.3$  Hz), 123.7, 121.0, 62.0, 53.9, 50.2, 14.2.  $^{19}\text{F NMR}$  (377 MHz, Chloroform-*d*)  $\delta$  -62.88. **HRMS(ESI)**  $m/z$ :  $[\text{M} + \text{H}]^+$  calcd for  $\text{C}_{22}\text{H}_{19}\text{ClF}_3\text{N}_2\text{O}_5^+$  483.0929; Found: 483.0924.

**5-ethyl 1-methyl (E)-3-(2,6-difluorophenyl)-2-oxo-3,4-dihydrobenzo[d][1,3]diazocine-1,5(2H)-dicarboxylate (3as)**

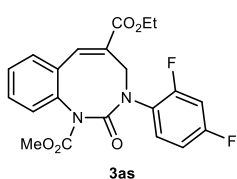

The reaction was conducted on a 0.1 mmol scale according to the GP1 and afforded benzodiazocine **3as** as white solid (31.6 mg, 76% yield, mp: 50-52 °C).  $R_f = 0.4$  (petroleum ether/ethyl acetate = 3:1).  $^1\text{H NMR}$  (400 MHz, Chloroform-*d*)  $\delta$  7.91 (s, 1H), 7.58 – 7.43 (m, 4H), 7.39 (td,  $J = 8.6, 6.1$  Hz, 1H), 6.94 – 6.82 (m, 2H), 4.67 (s, 1H), 4.28 (q,  $J = 7.1$  Hz, 3H), 3.81 (s, 3H), 1.33 (t,  $J = 7.1$  Hz, 3H).  $^{13}\text{C NMR}$  (101 MHz,  $\text{CDCl}_3$ )  $\delta$  166.3, 163.4 – 156.3 (m), 153.8, 153.3, 141.0, 135.7, 133.9, 132.5, 131.6, 130.6, 129.8 (dd,  $J = 9.9, 1.9$  Hz), 129.4, 129.2, 126.8 (d,  $J = 4.3$  Hz), 126.6 (d,  $J = 3.7$  Hz), 111.9 (d,  $J = 18.7$  Hz), 106.4 – 103.9 (m), 61.7, 53.9, 50.4, 14.2.  $^{19}\text{F NMR}$  (377 MHz, Chloroform-*d*)  $\delta$  -109.07 – -109.20 (m), -115.58 (q,  $J = 8.5$  Hz). **HRMS(ESI)**  $m/z$ :  $[\text{M} + \text{H}]^+$  calcd for  $\text{C}_{21}\text{H}_{19}\text{F}_2\text{N}_2\text{O}_5^+$  417.1257; Found: 417.1257.

**5-ethyl 1-methyl (E)-3-(2-butoxy-2-oxoethyl)-2-oxo-3,4-dihydrobenzo[d][1,3]diazocine-1,5(2H)-dicarboxylate (3au)**

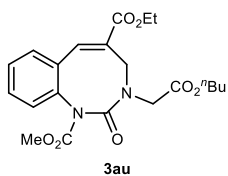

The reaction was conducted on a 0.1 mmol scale according to the GP1 and afforded benzodiazocine **3au** as colorless oil (28.4 mg, 68% yield).  $R_f = 0.5$  (petroleum ether/ethyl acetate = 5:1).  $^1\text{H NMR}$  (400 MHz, Chloroform-*d*)  $\delta$  7.75 (s, 1H), 7.41 (d,  $J = 13.0$  Hz, 2H), 7.35 (s, 2H), 4.55 – 4.27 (m, 2H), 4.22 (q,  $J = 7.0$  Hz, 2H), 4.08 – 3.83 (m, 4H), 3.70 (s, 3H), 1.47 (dt,  $J = 14.4, 6.7$  Hz, 2H), 1.28 (t,  $J = 7.1$  Hz, 3H), 1.21 (dd,  $J = 14.2, 6.6$  Hz, 2H), 0.82 (t,  $J = 7.3$  Hz, 3H).  $^{13}\text{C NMR}$  (101 MHz,  $\text{CDCl}_3$ )  $\delta$  168.3, 166.5, 154.3, 153.8, 140.7, 135.6, 134.0, 132.5, 131.4, 130.7, 129.3, 129.1, 65.3, 61.7, 53.8, 51.8, 48.3, 30.4, 19.0, 14.2, 13.6. **HRMS(ESI)**  $m/z$ :  $[\text{M} + \text{H}]^+$  calcd for  $\text{C}_{21}\text{H}_{27}\text{N}_2\text{O}_7^+$  419.1813; Found: 419.1811.

**dimethyl (E)-2-oxo-3-(p-tolyl)-3,4-dihydrobenzo[d][1,3]diazocine-1,5(2H)-dicarboxylate (3ba)**

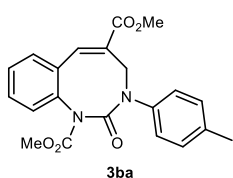

The reaction was conducted on a 0.1 mmol scale according to the GP1 and afforded benzodiazocine **3ba** as white solid (34.2 mg, 90% yield, mp: 165-167 °C).  $R_f = 0.4$  (petroleum ether/ethyl acetate = 3:1).  $^1\text{H NMR}$  (400 MHz, Chloroform-*d*)  $\delta$  7.98 (s, 1H), 7.70 – 7.47 (m, 4H), 7.26 (s, 4H), 4.99 (s, 1H), 4.64 (s, 1H), 3.94 (s, 3H), 3.92 (s, 3H), 2.42 (s, 3H).  $^{13}\text{C NMR}$  (101 MHz,  $\text{CDCl}_3$ )  $\delta$  167.3, 153.8, 153.7, 140.9, 139.8, 137.3, 136.4, 134.4, 132.5, 131.9, 131.0, 129.9, 129.3, 129.1, 125.5, 53.8, 52.7, 50.8, 21.1. **HRMS(ESI)**  $m/z$ :  $[\text{M} + \text{H}]^+$  calcd for  $\text{C}_{21}\text{H}_{21}\text{N}_2\text{O}_5^+$  381.1445; Found: 381.1450.

**5-butyl 1-methyl (E)-2-oxo-3-(p-tolyl)-3,4-dihydrobenzo[d][1,3]diazocine-1,5(2H)-dicarboxylate (3ca)**

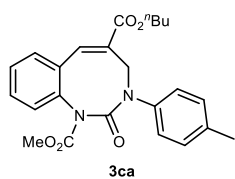

The reaction was conducted on a 0.1 mmol scale according to the GP1 and afforded benzodiazocine **3ca** as white solid (41.8 mg, 99% yield, mp: 220-222 °C).  $R_f = 0.5$  (petroleum ether/ethyl acetate = 3:1).  $^1\text{H NMR}$  (400 MHz, Chloroform-*d*)  $\delta$  7.87 (s, 1H), 7.55 (d,  $J = 7.8$  Hz, 1H), 7.53 – 7.38 (m, 3H), 7.21 – 7.11 (m, 4H), 4.87 (s, 1H), 4.52 (s, 1H), 4.28 – 4.11 (m, 2H), 3.84 (s, 3H), 2.32 (s, 3H), 1.66 (p,  $J = 6.7$  Hz, 2H), 1.38 (h,  $J = 7.3, 6.7$  Hz, 2H), 0.94 (t,  $J = 7.4$  Hz, 3H).  $^{13}\text{C NMR}$  (101 MHz,  $\text{CDCl}_3$ )  $\delta$  166.8, 153.8, 153.7, 140.8, 139.8, 137.2, 136.2, 134.2, 132.7, 131.8, 130.9, 129.8, 129.6, 129.1, 125.5, 65.6, 53.8, 50.7, 30.6, 21.1, 19.2, 13.7. **HRMS(ESI)**  $m/z$ :  $[\text{M} + \text{H}]^+$  calcd for  $\text{C}_{24}\text{H}_{27}\text{N}_2\text{O}_5^+$  423.1915; Found: 423.1918.

#### 5-isobutyl 1-methyl (E)-2-oxo-3-(p-tolyl)-3,4-dihydrobenzo[d][1,3]diazocine-1,5(2H)-dicarboxylate (**3da**)

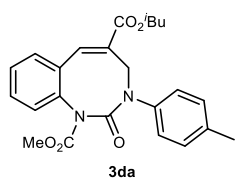

The reaction was conducted on a 0.1 mmol scale according to the GP1 and afforded benzodiazocine **3da** as white solid (41 mg, 97% yield, mp: 91-93 °C).  $R_f = 0.5$  (petroleum ether/ethyl acetate = 3:1).  $^1\text{H NMR}$  (400 MHz, Chloroform-*d*)  $\delta$  7.88 (s, 1H), 7.56 (dt,  $J = 7.7, 1.8$  Hz, 1H), 7.46 (dddd,  $J = 16.6, 14.7, 8.3, 4.8$  Hz, 3H), 7.16 (qd,  $J = 8.6, 2.1$  Hz, 4H), 4.90 (d,  $J = 15.3$  Hz, 1H), 4.52 (d,  $J = 13.3$  Hz, 1H), 4.00 (s, 2H), 3.84 (d,  $J = 2.1$  Hz, 3H), 2.32 (d,  $J = 2.1$  Hz, 3H), 1.99 (ttt,  $J = 13.4, 6.5, 2.1$  Hz, 1H), 0.95 (d,  $J = 2.1$  Hz, 3H), 0.93 (d,  $J = 2.1$  Hz, 3H).  $^{13}\text{C NMR}$  (101 MHz,  $\text{CDCl}_3$ )  $\delta$  166.8, 153.8, 153.7, 140.9, 139.8, 137.2, 136.3, 134.3, 132.7, 131.8, 130.9, 129.8, 129.6, 129.1, 125.5, 71.8, 53.8, 50.7, 27.8, 21.1, 19.1. **HRMS(ESI)**  $m/z$ :  $[\text{M} + \text{H}]^+$  calcd for  $\text{C}_{24}\text{H}_{27}\text{N}_2\text{O}_5^+$  423.1915; Found: 423.1919.

#### 5-(tert-butyl) 1-methyl (E)-2-oxo-3-(p-tolyl)-3,4-dihydrobenzo[d][1,3]diazocine-1,5(2H)-dicarboxylate (**3ea**)

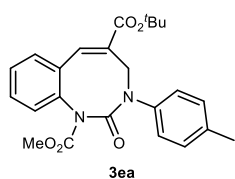

The reaction was conducted on a 0.1 mmol scale according to the GP1 and afforded benzodiazocine **3ea** as colorless viscous oil (37.6 mg, 89% yield).  $R_f = 0.5$  (petroleum ether/ethyl acetate = 5:1).  $^1\text{H NMR}$  (400 MHz, Chloroform-*d*)  $\delta$  7.80 (s, 1H), 7.57 (dd,  $J = 7.8, 1.6$  Hz, 1H), 7.53 – 7.40 (m, 3H), 7.24 – 7.15 (m, 4H), 3.86 (s, 3H), 2.35 (s, 3H), 1.52 (s, 9H).  $^{13}\text{C NMR}$  (101 MHz,  $\text{CDCl}_3$ )  $\delta$  165.8, 153.8, 153.7, 140.0, 140.0, 137.1, 136.1, 133.9, 133.1, 131.5, 131.1, 130.8, 129.8, 129.0, 125.5, 82.0, 53.8, 50.7, 28.1, 21.1. **HRMS(ESI)**  $m/z$ :  $[\text{M} + \text{H}]^+$  calcd for  $\text{C}_{24}\text{H}_{27}\text{N}_2\text{O}_5^+$  423.1915; Found: 423.1922.

#### 5-benzyl 1-methyl (E)-2-oxo-3-(p-tolyl)-3,4-dihydrobenzo[d][1,3]diazocine-1,5(2H)-dicarboxylate (**3fa**)

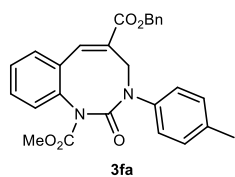

The reaction was conducted on a 0.1 mmol scale according to the GP1 and afforded benzodiazocine **3fa** as white solid (41.5 mg, 91% yield, mp: 153-155 °C).  $R_f = 0.4$  (petroleum ether/ethyl acetate = 3:1).  $^1\text{H NMR}$  (400 MHz, Chloroform-*d*)  $\delta$  7.96 (s, 1H), 7.59 (dd,  $J = 7.9, 1.5$  Hz, 1H), 7.56 – 7.43 (m, 3H), 7.38 (tq,  $J = 5.3, 3.2, 2.4$  Hz, 5H), 7.21 – 7.13 (m, 4H), 5.36 – 5.19 (m, 2H), 4.94 (d,  $J = 16.6$  Hz, 1H), 4.55 (d,  $J = 16.4$  Hz, 1H), 3.85 (s, 3H), 2.35 (s, 3H).  $^{13}\text{C NMR}$  (101 MHz,  $\text{CDCl}_3$ )  $\delta$  166.6, 153.8, 153.7, 141.4, 139.8, 137.2, 136.3, 135.6, 134.3, 132.7, 131.9, 131.0, 129.9, 129.3, 129.1, 128.7, 128.5, 128.3, 125.5, 67.5, 53.9, 50.7, 21.1. **HRMS(ESI)**  $m/z$ :  $[\text{M} + \text{H}]^+$  calcd for  $\text{C}_{27}\text{H}_{25}\text{N}_2\text{O}_5^+$  457.1758; Found: 457.1762.

#### diethyl (E)-2-oxo-3-(p-tolyl)-3,4-dihydrobenzo[d][1,3]diazocine-1,5(2H)-dicarboxylate (**3ga**)

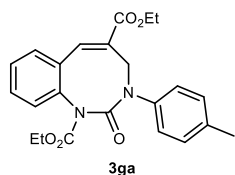

The reaction was conducted on a 0.1 mmol scale according to the GP1 and afforded benzodiazocine **3ga** as white solid (40.4 mg, 99% yield, mp: 111-113 °C).  $R_f = 0.4$  (petroleum ether/ethyl acetate = 3:1).  $^1\text{H NMR}$  (400 MHz, Chloroform-*d*)  $\delta$  7.91 (s, 1H), 7.59 (d,  $J = 8.0$  Hz, 1H), 7.55 – 7.48 (m, 2H), 7.48 – 7.41 (m, 1H), 7.24 – 7.14 (m, 4H), 4.89



(s, 1H), 4.55 (s, 1H), 4.31 (q,  $J = 7.2$  Hz, 4H), 2.35 (s, 3H), 1.35 (td,  $J = 7.1, 3.7$  Hz, 6H).  $^{13}\text{C}$  NMR (101 MHz,  $\text{CDCl}_3$ )  $\delta$  166.8, 153.8, 153.3, 140.9, 139.9, 137.2, 136.3, 134.2, 132.8, 131.7, 130.9, 129.9, 129.6, 129.0, 125.5, 62.9, 61.7, 50.6, 21.1, 14.5, 14.3. HRMS(ESI)  $m/z$ :  $[\text{M} + \text{H}]^+$  calcd for  $\text{C}_{23}\text{H}_{25}\text{N}_2\text{O}_5^+$  409.1758; Found: 409.1760.

#### 1-(tert-butyl) 5-ethyl (E)-2-oxo-3-(p-tolyl)-3,4-dihydrobenzo[d][1,3]diazocine-1,5(2H)-dicarboxylate (3ha)

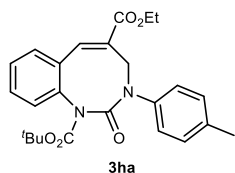

The reaction was conducted on a 0.1 mmol scale according to the GP1 and afforded benzodiazocine **3ha** as white solid (31.8 mg, 73% yield, mp: 132-134 °C).  $R_f = 0.4$  (petroleum ether/ethyl acetate = 3:1).  $^1\text{H}$  NMR (400 MHz, Chloroform- $d$ )  $\delta$  7.90 (s, 1H), 7.60 (dd,  $J = 7.8, 1.3$  Hz, 1H), 7.55 – 7.46 (m, 2H), 7.45 – 7.38 (m, 1H), 7.19 (s, 4H), 4.90 (s, 1H), 4.56 (s, 1H), 4.31 (q,  $J = 7.2$  Hz, 2H), 2.36 (s, 3H), 1.56 (s, 9H), 1.36 (t,  $J = 7.2$  Hz, 3H).  $^{13}\text{C}$  NMR (101 MHz,  $\text{CDCl}_3$ )  $\delta$  167.0, 153.9, 152.0, 141.1, 140.1, 137.1, 136.5, 134.4, 132.7, 131.7, 131.1, 129.8, 129.5, 128.7, 125.5, 82.6, 61.7, 50.3, 28.3, 21.1, 14.3. HRMS(ESI)  $m/z$ :  $[\text{M} + \text{H}]^+$  calcd for  $\text{C}_{25}\text{H}_{29}\text{N}_2\text{O}_5^+$  437.2071; Found: 437.2063.

#### 1-allyl 5-ethyl (E)-2-oxo-3-(p-tolyl)-3,4-dihydrobenzo[d][1,3]diazocine-1,5(2H)-dicarboxylate (3ia)

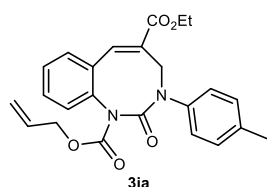

The reaction was conducted on a 0.1 mmol scale according to the GP1 and afforded benzodiazocine **3ia** as white solid (35.7 mg, 85% yield, mp: 105-107 °C).  $R_f = 0.4$  (petroleum ether/ethyl acetate = 3:1).  $^1\text{H}$  NMR (400 MHz, Chloroform- $d$ )  $\delta$  7.87 (s, 1H), 7.56 (d,  $J = 7.7$  Hz, 1H), 7.53 – 7.35 (m, 3H), 7.27 (d,  $J = 11.7$  Hz, 2H), 7.17 (t,  $J = 6.3$  Hz, 4H), 5.92 (tt,  $J = 10.8, 5.3$  Hz, 1H), 5.33 (d,  $J = 17.1$  Hz, 1H), 5.24 (d,  $J = 10.5$  Hz, 1H), 4.89 (d,  $J = 15.2$  Hz, 1H), 4.73 (s, 2H), 4.50 (d,  $J = 15.4$  Hz, 1H), 4.27 (q,  $J = 7.2$  Hz, 2H), 2.32 (s, 3H), 1.32 (t,  $J = 7.2$  Hz, 3H).  $^{13}\text{C}$  NMR (101 MHz,  $\text{CDCl}_3$ )  $\delta$  166.8, 153.6, 153.0, 140.8, 139.9, 137.2, 136.2, 134.2, 132.8, 131.8, 131.8, 130.9, 129.9, 129.6, 129.0, 125.5, 118.3, 67.1, 61.7, 50.6, 21.1, 14.3. HRMS(ESI)  $m/z$ :  $[\text{M} + \text{H}]^+$  calcd for  $\text{C}_{24}\text{H}_{25}\text{N}_2\text{O}_5^+$  421.1758; Found: 421.1762.

#### ethyl (E)-1-benzoyl-2-oxo-3-(p-tolyl)-1,2,3,4-tetrahydrobenzo[d][1,3]diazocine-5-carboxylate (3ja)

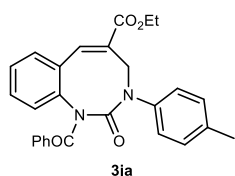

The reaction was conducted on a 0.1 mmol scale according to the GP1 and afforded benzodiazocine **3ja** as white solid (30.8 mg, 70% yield, mp: 141-143 °C).  $R_f = 0.4$  (petroleum ether/ethyl acetate = 3:1).  $^1\text{H}$  NMR (400 MHz, Chloroform- $d$ )  $\delta$  8.02 (s, 1H), 7.52 (t,  $J = 7.7$  Hz, 3H), 7.48 – 7.36 (m, 4H), 7.31 (t,  $J = 7.5$  Hz, 2H), 7.21 – 7.11 (m, 4H), 4.81 (d,  $J = 14.2$  Hz, 1H), 4.34 (q,  $J = 7.0$  Hz, 3H), 2.31 (s, 3H), 1.36 (t,  $J = 7.1$  Hz, 3H).  $^{13}\text{C}$  NMR (101 MHz,  $\text{CDCl}_3$ )  $\delta$  169.9, 166.5, 154.6, 141.5, 140.5, 137.2, 136.7, 134.3, 134.0, 132.3, 131.6, 131.4, 131.3, 130.4, 129.9, 129.2, 128.2, 128.1, 125.7, 61.9, 50.6, 21.0, 14.3. HRMS(ESI)  $m/z$ :  $[\text{M} + \text{H}]^+$  calcd for  $\text{C}_{27}\text{H}_{25}\text{N}_2\text{O}_4^+$  441.1809; Found: 441.1809.

#### 5-ethyl 1-((1R,2S,5R)-2-isopropyl-5-methylcyclohexyl) (E)-2-oxo-3-(p-tolyl)-3,4-dihydrobenzo[d][1,3]diazocine-1,5(2H)-dicarboxylate (3ka)

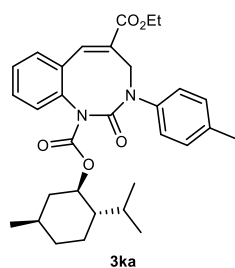

The reaction was conducted on a 0.1 mmol scale according to the GP1 and afforded benzodiazocine **3ka** as colorless viscous oil (49.8 mg, 96% yield).  $R_f = 0.4$  (petroleum ether/ethyl acetate = 10:1).  $^1\text{H}$  NMR (400 MHz, Chloroform- $d$ )  $\delta$  7.87 (s, 1H), 7.56 (d,  $J = 7.7$  Hz, 1H), 7.47 (dd,  $J = 15.2, 7.4$  Hz, 2H), 7.43 – 7.27 (m, 2H), 7.16 (s, 4H), 4.85 (d,  $J = 15.1$  Hz, 1H), 4.68 (s, 1H), 4.47 (d,  $J = 15.4$  Hz, 1H), 4.27 (q,  $J = 6.8$  Hz, 2H), 2.32 (s, 3H), 2.20 (d,  $J = 26.5$  Hz, 1H), 2.01 (d,  $J = 22.5$  Hz, 1H), 1.68 (d,  $J = 10.3$  Hz, 2H), 1.43 – 1.23 (m, 5H), 1.06 (q,  $J = 12.4$  Hz, 2H), 0.95 – 0.87 (m, 6H), 0.81 (d,  $J = 6.1$  Hz, 3H).  $^{13}\text{C}$  NMR

(101 MHz, CDCl<sub>3</sub>)  $\delta$  166.8, 153.7, 153.6, 140.1, 137.1, 136.4, 134.8, 134.1, 132.9, 131.6, 131.1, 129.8, 129.6, 129.5, 129.5, 128.8, 125.5, 120.7, 61.7, 50.4, 34.2, 31.4, 23.4, 22.0, 21.0, 20.8, 16.3, 14.2. **HRMS(ESI)**  $m/z$ : [M + H]<sup>+</sup> calcd for C<sub>31</sub>H<sub>39</sub>N<sub>2</sub>O<sub>5</sub><sup>+</sup> 519.2854; Found: 519.2850.

**5-ethyl 1-methyl (E)-10-methyl-2-oxo-3-(p-tolyl)-3,4-dihydrobenzo[d][1,3]diazocine-1,5(2H)-dicarboxylate (3la)**

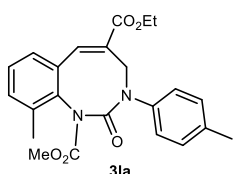

The reaction was conducted on a 0.1 mmol scale according to the GP1 and afforded benzodiazocine **3la** as white solid (23.7 mg, 58% yield, mp: 118-120 °C).  $R_f$  = 0.4 (petroleum ether/ethyl acetate = 3:1). **<sup>1</sup>H NMR** (400 MHz, Chloroform-*d*)  $\delta$  7.96 (s, 1H), 7.46 – 7.33 (m, 2H), 7.32 – 7.28 (m, 1H), 7.25 – 7.15 (m, 4H), 4.66 (dd,  $J$  = 15.8, 1.0 Hz, 1H), 4.32 (q,  $J$  = 7.2 Hz, 2H), 4.15 (d,  $J$  = 15.8 Hz, 1H), 3.81 (s, 3H), 2.50 (s, 3H), 2.35 (s, 3H), 1.37 (t,  $J$  = 7.2 Hz, 3H). **<sup>13</sup>C NMR** (101 MHz, CDCl<sub>3</sub>)  $\delta$  166.2, 153.6, 153.3, 141.9, 141.0, 139.8, 137.1, 135.3, 134.4, 133.2, 129.9, 129.4, 129.1, 128.9, 125.9, 61.6, 53.8, 50.4, 21.1, 18.3, 14.3. **HRMS(ESI)**  $m/z$ : [M + H]<sup>+</sup> calcd for C<sub>23</sub>H<sub>25</sub>N<sub>2</sub>O<sub>5</sub><sup>+</sup> 409.1758; Found: 409.1761.

**5-ethyl 1-methyl (E)-9-methyl-2-oxo-3-(p-tolyl)-3,4-dihydrobenzo[d][1,3]diazocine-1,5(2H)-dicarboxylate (3ma)**

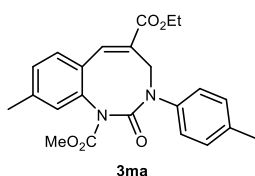

The reaction was conducted on a 0.1 mmol scale according to the GP1 and afforded benzodiazocine **3ma** as white solid (40.4 mg, 99% yield, mp: 117-119 °C).  $R_f$  = 0.4 (petroleum ether/ethyl acetate = 3:1). **<sup>1</sup>H NMR** (400 MHz, Chloroform-*d*)  $\delta$  7.84 (s, 1H), 7.37 (dd,  $J$  = 4.8, 3.1 Hz, 2H), 7.29 – 7.20 (m, 2H), 7.15 (dd,  $J$  = 8.4, 5.5 Hz, 4H), 4.92 (d,  $J$  = 16.0 Hz, 1H), 4.60 (d,  $J$  = 15.3 Hz, 1H), 4.26 (q,  $J$  = 7.2 Hz, 2H), 3.86 (s, 3H), 2.41 (s, 3H), 2.32 (s, 3H), 1.31 (t,  $J$  = 7.2 Hz, 3H). **<sup>13</sup>C NMR** (101 MHz, CDCl<sub>3</sub>)  $\delta$  167.0, 153.9, 153.7, 142.9, 140.7, 139.6, 137.1, 136.2, 134.9, 131.6, 129.9, 129.8, 129.4, 128.4, 125.4, 61.6, 53.8, 50.7, 21.3, 21.1, 14.3. **HRMS(ESI)**  $m/z$ : [M + H]<sup>+</sup> calcd for C<sub>23</sub>H<sub>25</sub>N<sub>2</sub>O<sub>5</sub><sup>+</sup> 409.1758; Found: 409.1764.

**5-ethyl 1-methyl (E)-9-chloro-2-oxo-3-(p-tolyl)-3,4-dihydrobenzo[d][1,3]diazocine-1,5(2H)-dicarboxylate (3na)**

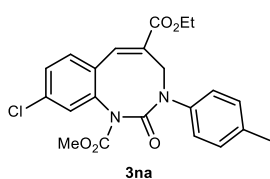

The reaction was conducted on a 0.1 mmol scale according to the GP1 and afforded benzodiazocine **3na** as white solid (36.8 mg, 86% yield, mp: 120-122 °C).  $R_f$  = 0.4 (petroleum ether/ethyl acetate = 3:1). **<sup>1</sup>H NMR** (400 MHz, Chloroform-*d*)  $\delta$  7.88 (s, 1H), 7.64 (d,  $J$  = 2.0 Hz, 1H), 7.54 – 7.41 (m, 2H), 7.24 (s, 4H), 4.97 (s, 1H), 4.68 (s, 1H), 4.34 (q,  $J$  = 7.2 Hz, 2H), 3.94 (s, 3H), 2.40 (s, 3H), 1.39 (t,  $J$  = 7.1 Hz, 3H). **<sup>13</sup>C NMR** (101 MHz, CDCl<sub>3</sub>)  $\delta$  166.7, 153.4, 153.4, 139.5, 139.3, 137.4, 137.2, 137.2, 135.5, 131.2, 130.9, 130.0, 129.9, 129.3, 125.4, 125.4, 61.9, 54.0, 50.7, 21.1, 14.2. **HRMS(ESI)**  $m/z$ : [M + H]<sup>+</sup> calcd for C<sub>22</sub>H<sub>22</sub>ClN<sub>2</sub>O<sub>5</sub><sup>+</sup> 429.1212; Found: 429.1213.

**5-ethyl 1-methyl (E)-9-bromo-2-oxo-3-(p-tolyl)-3,4-dihydrobenzo[d][1,3]diazocine-1,5(2H)-dicarboxylate (3oa)**

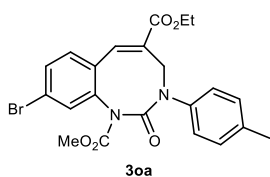

The reaction was conducted on a 0.1 mmol scale according to the GP1 and afforded benzodiazocine **3oa** as white solid (34.9 mg, 74% yield, mp: 73-75 °C).  $R_f$  = 0.4 (petroleum ether/ethyl acetate = 3:1). **<sup>1</sup>H NMR** (400 MHz, Chloroform-*d*)  $\delta$  7.78 (s, 1H), 7.71 (d,  $J$  = 2.1 Hz, 1H), 7.55 (dt,  $J$  = 8.3, 1.5 Hz, 1H), 7.33 (d,  $J$  = 8.3 Hz, 1H), 7.19 – 7.12 (m, 4H), 4.88 (s, 1H), 4.58 (s, 1H), 4.26 (q,  $J$  = 7.1 Hz, 2H), 3.86 (s, 3H), 2.32 (s,

3H), 1.31 (t,  $J = 7.2$  Hz, 3H).  $^{13}\text{C}$  NMR (101 MHz,  $\text{CDCl}_3$ )  $\delta$  166.7, 153.4, 153.4, 139.5, 139.4, 137.4, 137.2, 135.5, 134.1, 132.3, 131.3, 130.1, 129.9, 125.4, 125.3, 61.9, 54.0, 50.8, 21.1, 14.2. HRMS(ESI)  $m/z$ :  $[\text{M} + \text{H}]^+$  calcd for  $\text{C}_{22}\text{H}_{22}\text{BrN}_2\text{O}_5^+$  473.0707; Found: 473.0700.

**5-ethyl 1-methyl (E)-8-methoxy-2-oxo-3-(p-tolyl)-3,4-dihydrobenzo[d][1,3]diazocine-1,5(2H)-dicarboxylate (3pa)**

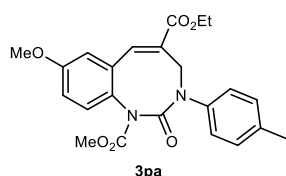

The reaction was conducted on a 0.1 mmol scale according to the GP1 and afforded benzodiazocine **3pa** as white solid (40.3 mg, 95% yield, mp: 140-142 °C).  $R_f = 0.4$  (petroleum ether/ethyl acetate = 3:1).  $^1\text{H}$  NMR (400 MHz, Chloroform- $d$ )  $\delta$  7.82 (s, 1H), 7.46 (d,  $J = 8.7$  Hz, 1H), 7.22 – 7.09 (m, 4H), 7.01 (dd,  $J = 8.7, 2.9$  Hz, 1H), 6.95 (d,  $J = 2.9$  Hz, 1H), 4.81 (d,  $J = 16.6$  Hz, 1H), 4.41 (d,  $J = 16.5$  Hz, 1H), 4.28 (q,  $J = 7.2$  Hz, 2H), 3.84 (s, 3H), 3.81 (s, 3H), 2.32 (s, 3H), 1.32 (t,  $J = 7.2$  Hz, 3H).  $^{13}\text{C}$  NMR (101 MHz,  $\text{CDCl}_3$ )  $\delta$  166.6, 159.5, 154.1, 153.9, 140.8, 140.2, 137.2, 134.3, 131.8, 129.9, 129.8, 128.8, 125.6, 118.2, 116.8, 61.7, 55.7, 53.8, 50.7, 21.1, 14.3. HRMS(ESI)  $m/z$ :  $[\text{M} + \text{H}]^+$  calcd for  $\text{C}_{23}\text{H}_{25}\text{N}_2\text{O}_6^+$  425.1707; Found: 425.1710.

**5-ethyl 1-methyl (E)-8-methyl-2-oxo-3-(p-tolyl)-3,4-dihydrobenzo[d][1,3]diazocine-1,5(2H)-dicarboxylate (3qa)**

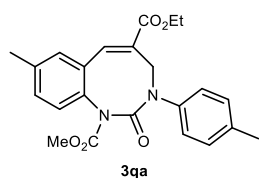

The reaction was conducted on a 0.1 mmol scale according to the GP1 and afforded benzodiazocine **3qa** as white solid (37.1 mg, 91% yield, mp: 119-121 °C).  $R_f = 0.4$  (petroleum ether/ethyl acetate = 3:1).  $^1\text{H}$  NMR (400 MHz, Chloroform- $d$ )  $\delta$  7.83 (s, 1H), 7.43 (d,  $J = 7.9$  Hz, 1H), 7.32 – 7.26 (m, 2H), 7.20 – 7.11 (m, 4H), 4.86 (d,  $J = 15.5$  Hz, 1H), 4.49 (d,  $J = 15.9$  Hz, 1H), 4.27 (q,  $J = 7.1$  Hz, 2H), 3.82 (s, 3H), 2.39 (s, 3H), 2.32 (s, 3H), 1.32 (t,  $J = 7.1$  Hz, 3H).  $^{13}\text{C}$  NMR (101 MHz,  $\text{CDCl}_3$ )  $\delta$  166.8, 153.9, 153.9, 141.0, 139.9, 139.1, 137.2, 134.6, 133.7, 132.5, 132.5, 130.6, 129.8, 129.4, 125.5, 61.7, 53.8, 50.7, 21.1, 21.0, 14.3. HRMS(ESI)  $m/z$ :  $[\text{M} + \text{H}]^+$  calcd for  $\text{C}_{23}\text{H}_{25}\text{N}_2\text{O}_5^+$  409.1758; Found: 409.1759.

**5-ethyl 1-methyl (E)-8-fluoro-2-oxo-3-(p-tolyl)-3,4-dihydrobenzo[d][1,3]diazocine-1,5(2H)-dicarboxylate (3ra)**

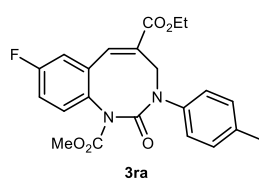

The reaction was conducted on a 0.1 mmol scale according to the GP1 and afforded benzodiazocine **3ra** as white solid (35 mg, 85% yield, mp: 139-141 °C).  $R_f = 0.4$  (petroleum ether/ethyl acetate = 3:1).  $^1\text{H}$  NMR (400 MHz, Chloroform- $d$ )  $\delta$  7.83 (s, 1H), 7.58 (dd,  $J = 8.7, 5.2$  Hz, 1H), 7.22 (d,  $J = 8.8$  Hz, 6H), 4.90 (d,  $J = 17.4$  Hz, 1H), 4.50 (d,  $J = 16.9$  Hz, 1H), 4.33 (q,  $J = 7.1$  Hz, 2H), 3.88 (s, 3H), 2.37 (s, 3H), 1.38 (t,  $J = 7.2$  Hz, 3H).  $^{13}\text{C}$  NMR (101 MHz,  $\text{CDCl}_3$ )  $\delta$  166.3, 162.1 (d,  $J = 250.1$  Hz), 153.8, 153.6, 139.9, 139.3, 137.4, 135.0 (d,  $J = 8.7$  Hz), 132.7 (d,  $J = 8.7$  Hz), 132.2 (d), 130.9, 129.9, 125.5, 119.8 (d,  $J = 23.4$  Hz), 118.5 (d,  $J = 22.3$  Hz), 61.9, 53.9, 50.8, 21.1, 14.2.  $^{19}\text{F}$  NMR (377 MHz, Chloroform- $d$ )  $\delta$  -111.90 (td,  $J = 8.7, 5.2$  Hz). HRMS(ESI)  $m/z$ :  $[\text{M} + \text{H}]^+$  calcd for  $\text{C}_{22}\text{H}_{22}\text{FN}_2\text{O}_5^+$  413.1507; Found: 413.1510.

**5-ethyl 1-methyl (E)-8-chloro-2-oxo-3-(p-tolyl)-3,4-dihydrobenzo[d][1,3]diazocine-1,5(2H)-dicarboxylate (3sa)**

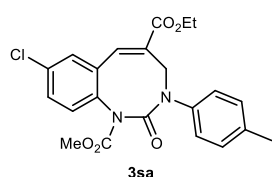

The reaction was conducted on a 0.1 mmol scale according to the GP1 and afforded benzodiazocine **3sa** as white solid (36.8 mg, 86% yield, mp: 151-153 °C).  $R_f = 0.4$  (petroleum ether/ethyl acetate = 3:1).  $^1\text{H}$  NMR (400 MHz, Chloroform- $d$ )  $\delta$  7.76 (s, 1H), 7.55 – 7.41 (m, 3H), 7.16 (s, 4H), 4.86 (s, 1H), 4.52 (s, 1H), 4.28 (q,  $J = 7.1$  Hz, 2H),

3.84 (s, 3H), 2.32 (s, 3H), 1.32 (t,  $J = 7.2$  Hz, 3H).  $^{13}\text{C}$  NMR (101 MHz,  $\text{CDCl}_3$ )  $\delta$  166.4, 153.6, 153.5, 139.7, 139.1, 137.4, 134.8, 134.3, 133.5, 132.2, 131.5, 131.0, 129.9, 129.4, 125.4, 61.9, 53.9, 50.7, 21.1, 14.2. HRMS(ESI)  $m/z$ :  $[\text{M} + \text{H}]^+$  calcd for  $\text{C}_{22}\text{H}_{22}\text{ClN}_2\text{O}_5^+$  429.1212; Found: 429.1215.

**5-ethyl 1-methyl (E)-8-bromo-2-oxo-3-(p-tolyl)-3,4-dihydrobenzo[d][1,3]diazocine-1,5(2H)-dicarboxylate (3ta)**

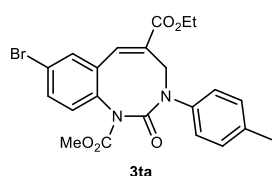

The reaction was conducted on a 0.1 mmol scale according to the GP1 and afforded benzodiazocine **3ta** as white solid (34.5 mg, 73% yield, mp: 178-180 °C).  $R_f = 0.4$  (petroleum ether/ethyl acetate = 3:1).  $^1\text{H}$  NMR (400 MHz,  $\text{Chloroform-}d$ )  $\delta$  7.76 (s, 1H), 7.68 – 7.55 (m, 2H), 7.42 (d,  $J = 8.3$  Hz, 1H), 7.16 (s, 4H), 4.86 (s, 1H), 4.53 (s, 1H), 4.27 (q,  $J = 7.1$  Hz, 2H), 3.84 (s, 3H), 2.32 (s, 3H), 1.32 (t,  $J = 7.2$  Hz, 3H).  $^{13}\text{C}$  NMR (101 MHz,  $\text{CDCl}_3$ )  $\delta$  166.4, 153.5, 153.4, 139.7, 139.0, 137.4, 136.5, 135.3, 134.6, 134.5, 132.4, 131.1, 129.9, 125.4, 122.7, 61.9, 53.9, 50.7, 21.1, 14.2. HRMS(ESI)  $m/z$ :  $[\text{M} + \text{H}]^+$  calcd for  $\text{C}_{22}\text{H}_{22}\text{BrN}_2\text{O}_5^+$  473.0707; Found: 473.0708.

**5-ethyl 1-methyl (E)-7-methyl-2-oxo-3-(p-tolyl)-3,4-dihydrobenzo[d][1,3]diazocine-1,5(2H)-dicarboxylate (3ua)**

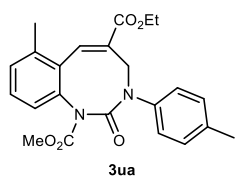

The reaction was conducted on a 0.1 mmol scale according to the GP1 and afforded benzodiazocine **3ua** as white solid (18 mg, 44% yield, mp: 146-148 °C).  $R_f = 0.4$  (petroleum ether/ethyl acetate = 3:1).  $^1\text{H}$  NMR (400 MHz,  $\text{Chloroform-}d$ )  $\delta$  8.00 (s, 1H), 7.46 – 7.35 (m, 2H), 7.31 (dd,  $J = 7.4, 1.8$  Hz, 1H), 7.20 (q,  $J = 8.5$  Hz, 4H), 4.43 (d,  $J = 14.3$  Hz, 1H), 4.34 (q,  $J = 7.1$  Hz, 2H), 3.79 – 3.63 (m, 4H), 2.36 (s, 3H), 2.33 (s, 3H), 1.37 (t,  $J = 7.1$  Hz, 3H).  $^{13}\text{C}$  NMR (101 MHz,  $\text{CDCl}_3$ )  $\delta$  165.2, 154.3, 152.6, 141.9, 141.2, 137.5, 137.1, 136.2, 135.1, 130.8, 130.5, 129.9, 129.6, 126.8, 126.2, 61.5, 53.7, 50.6, 21.1, 19.9, 14.3. HRMS(ESI)  $m/z$ :  $[\text{M} + \text{H}]^+$  calcd for  $\text{C}_{23}\text{H}_{25}\text{N}_2\text{O}_5^+$  409.1758; Found: 409.1759.

**5-ethyl 1-methyl (E)-9,10-dimethyl-2-oxo-3-(p-tolyl)-3,4-dihydrobenzo[d][1,3]diazocine-1,5(2H)-dicarboxylate (3va)**

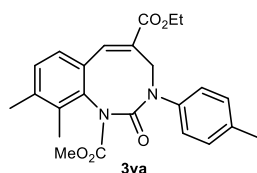

The reaction was conducted on a 0.1 mmol scale according to the GP1 and afforded benzodiazocine **3va** as white solid (24.5 mg, 58% yield, mp: 114-116 °C).  $R_f = 0.4$  (petroleum ether/ethyl acetate = 3:1).  $^1\text{H}$  NMR (400 MHz,  $\text{Chloroform-}d$ )  $\delta$  7.91 (s, 1H), 7.28 – 7.12 (m, 7H), 4.67 (d,  $J = 16.1$  Hz, 1H), 4.29 (q,  $J = 7.1$  Hz, 2H), 4.21 (d,  $J = 16.0$  Hz, 1H), 3.79 (s, 3H), 2.36 (d,  $J = 2.7$  Hz, 6H), 2.32 (s, 3H), 1.33 (t,  $J = 7.2$  Hz, 3H).  $^{13}\text{C}$  NMR (101 MHz,  $\text{CDCl}_3$ )  $\delta$  166.5, 153.8, 153.6, 142.2, 141.3, 140.8, 138.5, 137.0, 134.4, 132.5, 130.4, 129.8, 129.0, 128.5, 125.8, 61.6, 53.8, 50.4, 21.1, 20.9, 14.8, 14.3. HRMS(ESI)  $m/z$ :  $[\text{M} + \text{H}]^+$  calcd for  $\text{C}_{24}\text{H}_{27}\text{N}_2\text{O}_5^+$  423.1915; Found: 423.1915.

## 6.2. Products of derivatization

**3a-ethyl 7-methyl 2-benzyl-6-oxo-5-(p-tolyl)-1,2,3,5,6,11b-hexahydro-7H-benzo[d]pyrrolo[3,4-f][1,3]diazocine-3a,7(4H)-dicarboxylate (4a)**

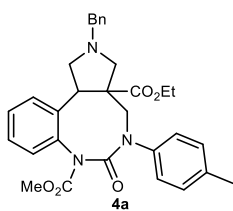

The reaction was conducted on a 0.1 mmol scale according to the corresponding procedure in section 5.2 and afforded **4a** as yellow solid (46.9 mg, 89% yield, mp: 130-132 °C).  $R_f$  = 0.4 (petroleum ether/ethyl acetate = 2:1). **<sup>1</sup>H NMR** (400 MHz, Chloroform-*d*)  $\delta$  7.40 (s, 4H), 7.31 (s, 4H), 7.25 (s, 1H), 7.09 (s, 2H), 6.97 (s, 2H), 4.52 (s, 1H), 4.38 (s, 2H), 3.81 (d,  $J$  = 3.3 Hz, 3H), 3.67 (d,  $J$  = 12.9 Hz, 1H), 3.51 (d,  $J$  = 12.9 Hz, 1H), 3.41 (d,  $J$  = 14.5 Hz, 1H), 3.32 (s, 1H), 3.09 (d,  $J$  = 9.0 Hz, 1H), 2.96 (d,  $J$  = 14.3 Hz, 1H), 2.84 (s, 1H), 2.29 (s, 3H), 2.16 – 2.01 (m, 1H), 1.44 – 1.30 (m, 3H). **<sup>13</sup>C NMR** (101 MHz, CDCl<sub>3</sub>)  $\delta$  173.0, 153.9, 153.3, 142.0, 141.0, 138.2, 137.1, 135.5, 129.8, 129.3, 128.7, 128.4, 128.4, 127.9, 127.3, 126.7, 126.2, 66.3, 62.0, 59.3, 59.1, 57.3, 56.6, 53.7, 42.7, 21.1, 14.3. **HRMS(ESI)**  $m/z$ : [M + H]<sup>+</sup> calcd for C<sub>31</sub>H<sub>34</sub>N<sub>3</sub>O<sub>5</sub><sup>+</sup> 528.2493; Found: 528.2494.

#### ethyl (E)-2-oxo-3-(p-tolyl)-1,2,3,4-tetrahydrobenzo[d][1,3]diazocine-5-carboxylate (**4b**)

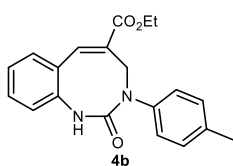

The reaction was conducted on a 0.1 mmol scale according to the corresponding procedure in section 5.2 and afforded **4b** as white solid (21.2 mg, 63% yield, mp: 163-165 °C).  $R_f$  = 0.4 (petroleum ether/ethyl acetate = 2:1). **<sup>1</sup>H NMR** (400 MHz, Chloroform-*d*)  $\delta$  7.99 (s, 1H), 7.38 (t,  $J$  = 7.2 Hz, 1H), 7.28 (d,  $J$  = 9.4 Hz, 5H), 7.15 (d,  $J$  = 8.1 Hz, 2H), 6.66 (s, 1H), 4.36 (s, 2H), 4.24 (q,  $J$  = 7.1 Hz, 2H), 2.33 (s, 3H), 1.25 (t,  $J$  = 7.1 Hz, 3H). **<sup>13</sup>C NMR** (101 MHz, CDCl<sub>3</sub>)  $\delta$  165.9, 156.8, 142.8, 142.2, 137.4, 136.2, 133.1, 131.7, 130.5, 129.6, 129.3, 127.1, 126.8, 126.2, 61.3, 48.1, 21.1, 14.1. **HRMS(ESI)**  $m/z$ : [M + H]<sup>+</sup> calcd for C<sub>20</sub>H<sub>21</sub>N<sub>2</sub>O<sub>3</sub><sup>+</sup> 337.1547; Found: 337.1543.

#### ethyl 2-(2-(p-tolylamino)-4H-benzo[d][1,3]oxazin-4-yl)acrylate (**4c**)

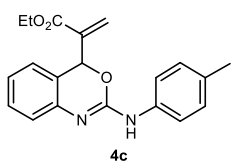

The reaction was conducted on a 0.1 mmol scale according to the corresponding procedure in section 5.2 and afforded **4c** as colorless viscous oil (18.8 mg, 56% yield).  $R_f$  = 0.5 (petroleum ether/ethyl acetate = 2:1). **<sup>1</sup>H NMR** (400 MHz, Chloroform-*d*)  $\delta$  7.87 (s, 1H), 7.21 (dd,  $J$  = 21.9, 6.9 Hz, 6H), 6.94 (t,  $J$  = 7.3 Hz, 1H), 6.76 (d,  $J$  = 7.6 Hz, 1H), 6.28 (s, 1H), 5.87 (s, 1H), 5.82 (s, 1H), 4.25 – 4.06 (m, 2H), 2.34 (s, 3H), 1.23 (d,  $J$  = 7.0 Hz, 3H).

**<sup>13</sup>C NMR** (101 MHz, CDCl<sub>3</sub>)  $\delta$  165.4, 153.8, 139.9, 138.6, 136.4, 136.0, 129.6, 128.6, 126.4, 126.3, 125.6, 122.2, 120.0, 114.1, 62.8, 61.1, 21.0, 14.0. **HRMS(ESI)**  $m/z$ : [M + H]<sup>+</sup> calcd for C<sub>20</sub>H<sub>21</sub>N<sub>2</sub>O<sub>3</sub><sup>+</sup> 337.1547; Found: 337.1543.

#### 5-ethyl 1-methyl (E)-2-oxo-3,4-dihydrobenzo[d][1,3]diazocine-1,5(2H)-dicarboxylate (**4d**)

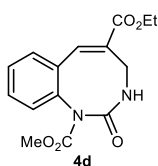

The reaction was conducted on a 0.1 mmol scale according to the corresponding procedure in section 5.2 and afforded **4d** as white solid (21.3 mg, 70% yield, mp: 135-137 °C).  $R_f$  = 0.4 (petroleum ether/ethyl acetate = 2:1). **<sup>1</sup>H NMR** (400 MHz, Chloroform-*d*)  $\delta$  7.88 (s, 1H), 7.46 (d,  $J$  = 12.3 Hz, 3H), 7.38 (d,  $J$  = 6.8 Hz, 1H), 6.38 (s, 1H), 4.29 (q,  $J$  = 6.8 Hz, 2H), 3.74 (s, 5H), 1.35 (t,  $J$  = 6.9 Hz, 3H). **<sup>13</sup>C NMR** (101 MHz, CDCl<sub>3</sub>)  $\delta$  165.8, 154.7, 153.9, 140.9, 135.4, 135.1, 130.9,

130.6, 130.5, 130.2, 129.1, 61.6, 53.8, 40.3, 14.3. **HRMS(ESI)**  $m/z$ : [M + H]<sup>+</sup> calcd for C<sub>15</sub>H<sub>17</sub>N<sub>2</sub>O<sub>5</sub><sup>+</sup> 305.1132; Found: 305.1128.

## 7. X-ray Crystallographic Analysis

### Cs<sub>2</sub>CO<sub>3</sub> catalyzed [6+2] cycloadduct - **3an**

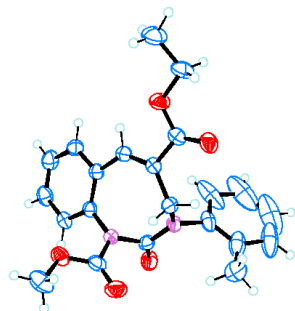

ORTEP diagram of **3an**. Thermal ellipsoids are shown at the 50% probability level. A colorless stick-shaped crystal of **3an** for X-ray diffraction was obtained by slowly volatilizing a saturated solution of **3fa** in hexane/ethyl acetate (5:1). The X-ray intensity data was measured on a Rigaku 007 Saturn 70 single crystal diffractometer.

|                                             |                                                               |
|---------------------------------------------|---------------------------------------------------------------|
| CCDC number                                 | 2023952                                                       |
| Identification code                         | <b>3an</b>                                                    |
| Empirical formula                           | C <sub>22</sub> H <sub>22</sub> N <sub>2</sub> O <sub>5</sub> |
| Formula weight                              | 394.41                                                        |
| Temperature/K                               | 150.00(10)                                                    |
| Crystal system                              | monoclinic                                                    |
| Space group                                 | P2 <sub>1</sub> /c                                            |
| a/Å                                         | 13.4099(4)                                                    |
| b/Å                                         | 15.0829(6)                                                    |
| c/Å                                         | 9.8724(3)                                                     |
| α/°                                         | 90                                                            |
| β/°                                         | 100.837(3)                                                    |
| γ/°                                         | 90                                                            |
| Volume/Å <sup>3</sup>                       | 1961.18(12)                                                   |
| Z                                           | 4                                                             |
| ρ <sub>calc</sub> /g/cm <sup>3</sup>        | 1.336                                                         |
| μ/mm <sup>-1</sup>                          | 0.096                                                         |
| F(000)                                      | 832.0                                                         |
| Crystal size/mm <sup>3</sup>                | 0.200 × 0.180 × 0.120                                         |
| Radiation                                   | MoKα (λ = 0.71073)                                            |
| 2θ range for data collection/°              | 6.186 to 58.598                                               |
| Index ranges                                | -18 ≤ h ≤ 17, -20 ≤ k ≤ 11, -12 ≤ l ≤ 12                      |
| Reflections collected                       | 9042                                                          |
| Independent reflections                     | 4514 [R <sub>int</sub> = 0.0368, R <sub>sigma</sub> = 0.0649] |
| Data/restraints/parameters                  | 4514/0/265                                                    |
| Goodness-of-fit on F <sup>2</sup>           | 1.029                                                         |
| Final R indexes [I ≥ 2σ (I)]                | R <sub>1</sub> = 0.0755, wR <sub>2</sub> = 0.1737             |
| Final R indexes [all data]                  | R <sub>1</sub> = 0.1208, wR <sub>2</sub> = 0.2089             |
| Largest diff. peak/hole / e Å <sup>-3</sup> | 0.86/-0.54                                                    |

## 8. NMR Spectra

### 8.1. Cs<sub>2</sub>CO<sub>3</sub> catalyzed [6+2] cycloadducts 3

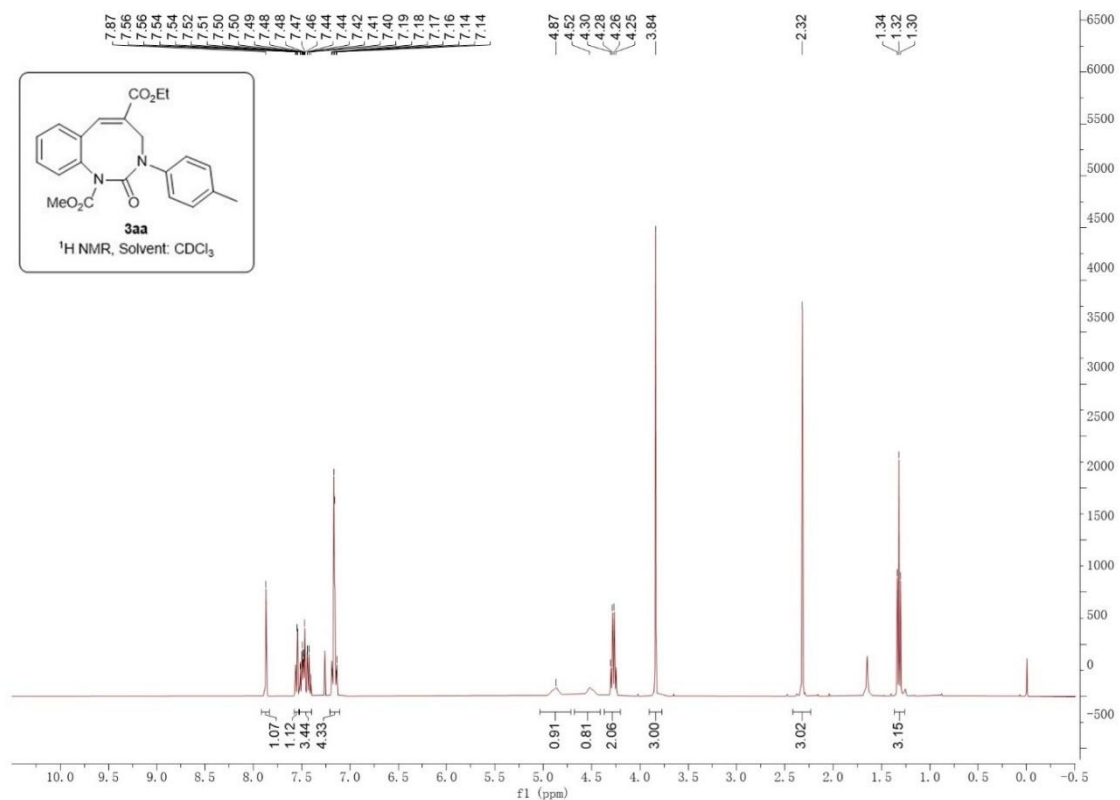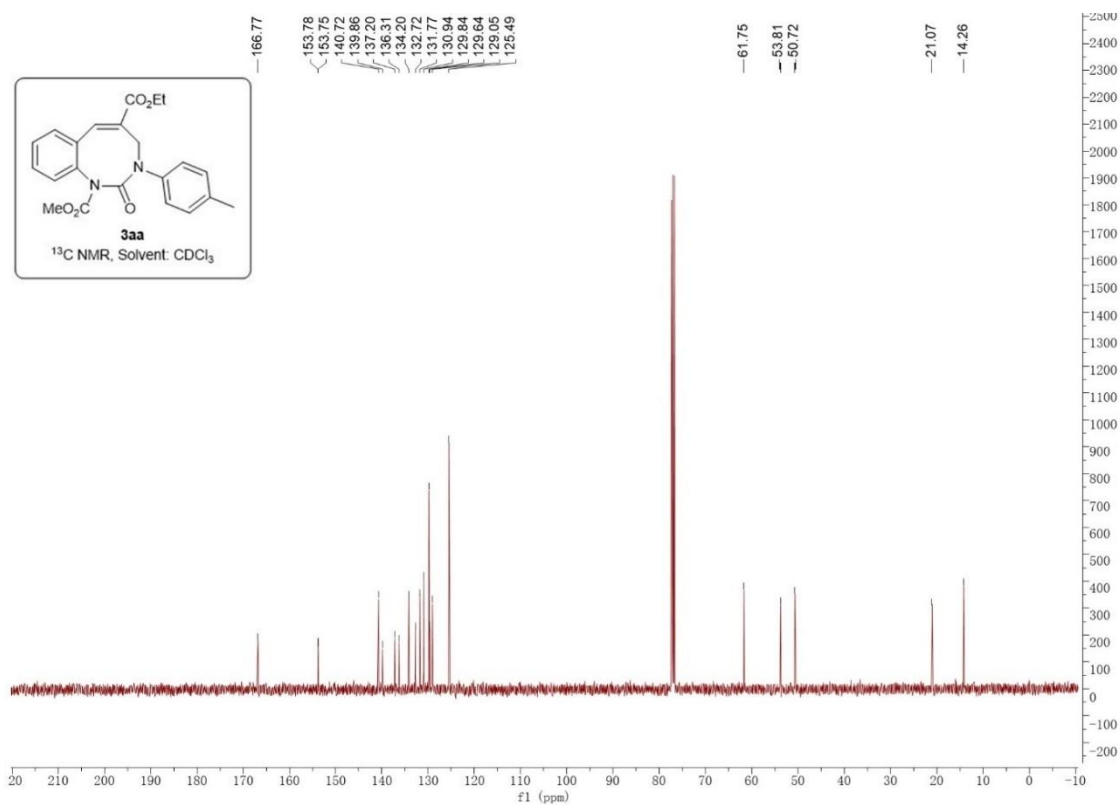

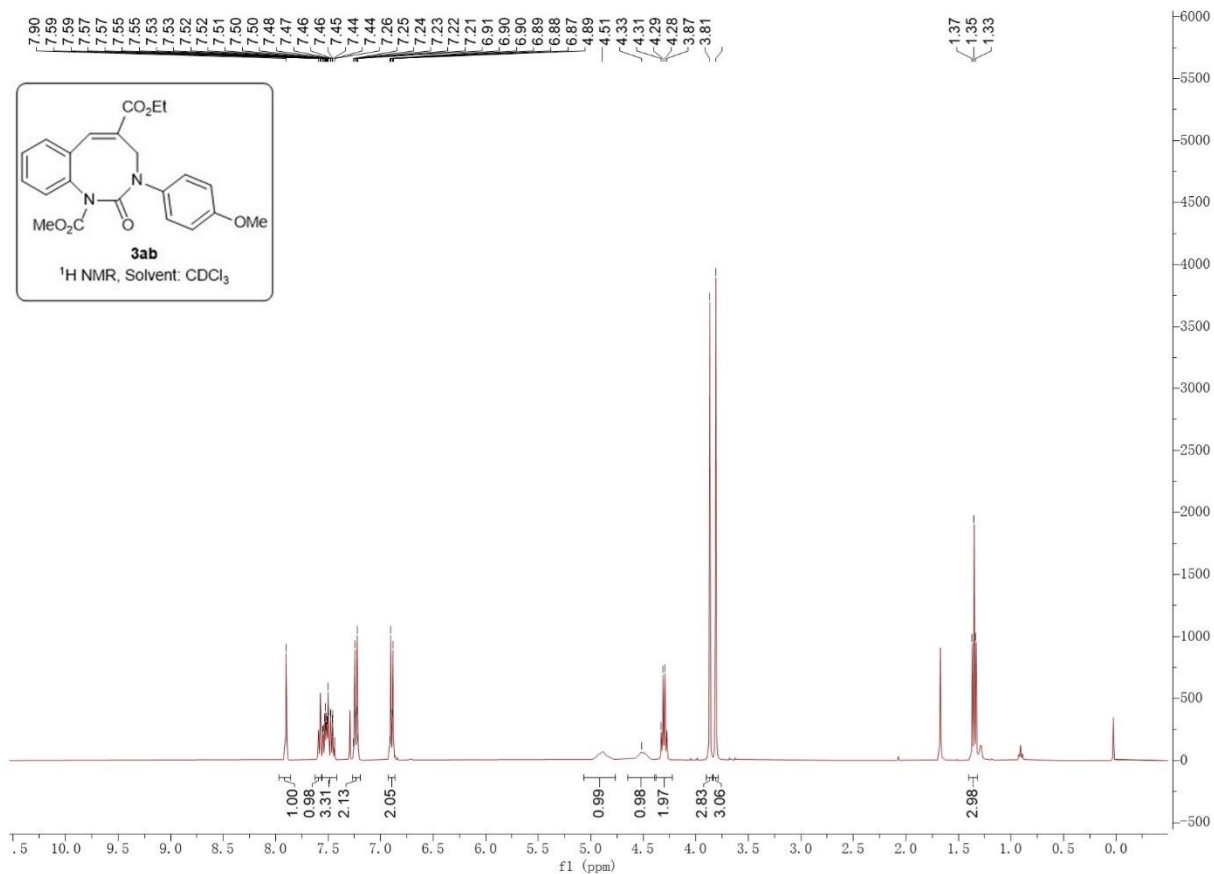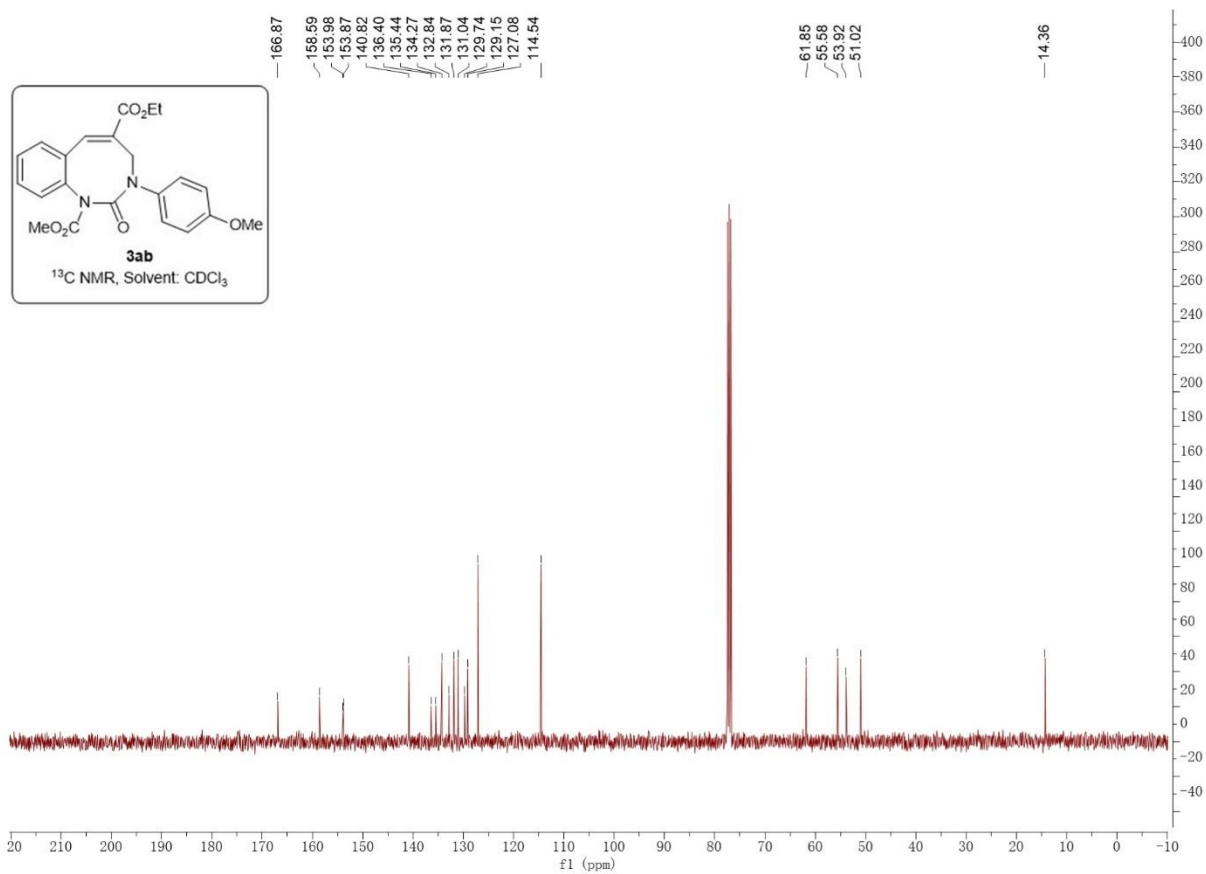



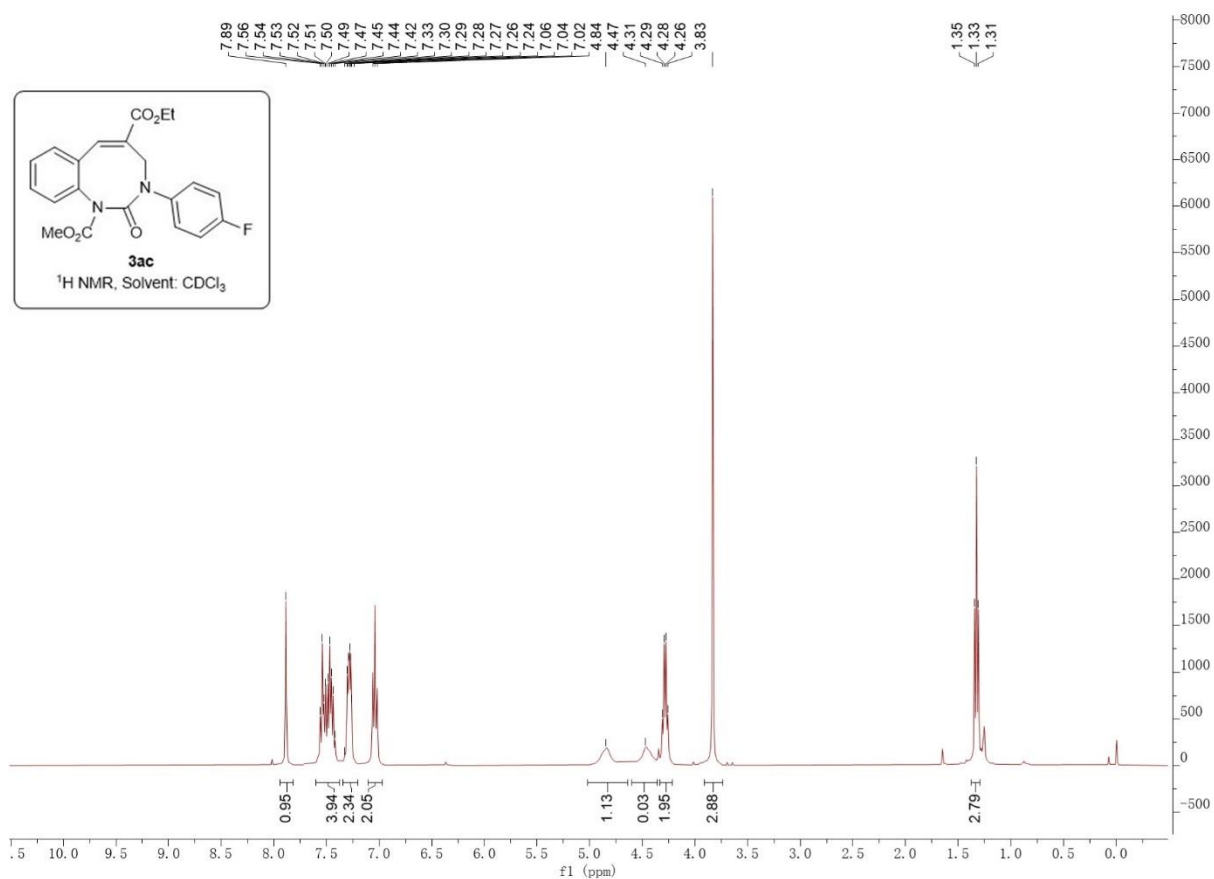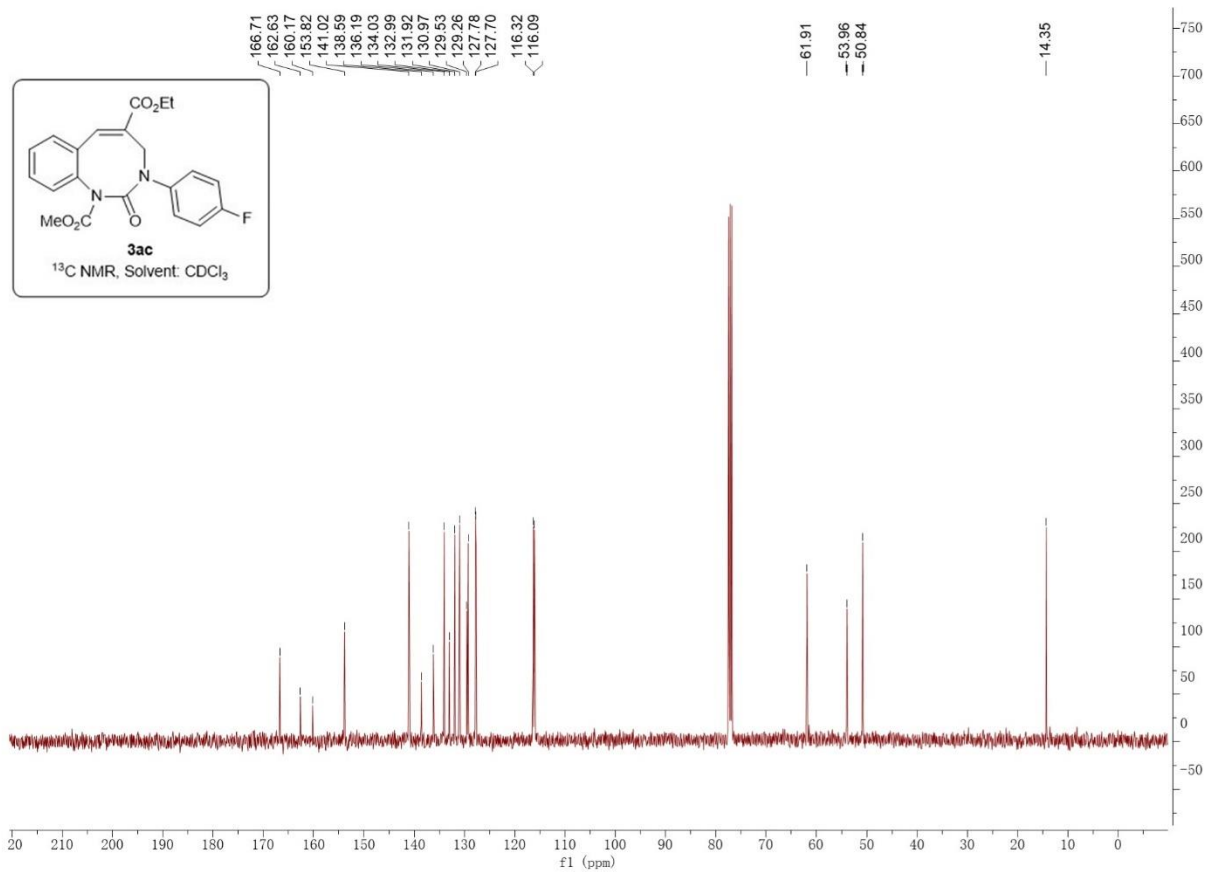

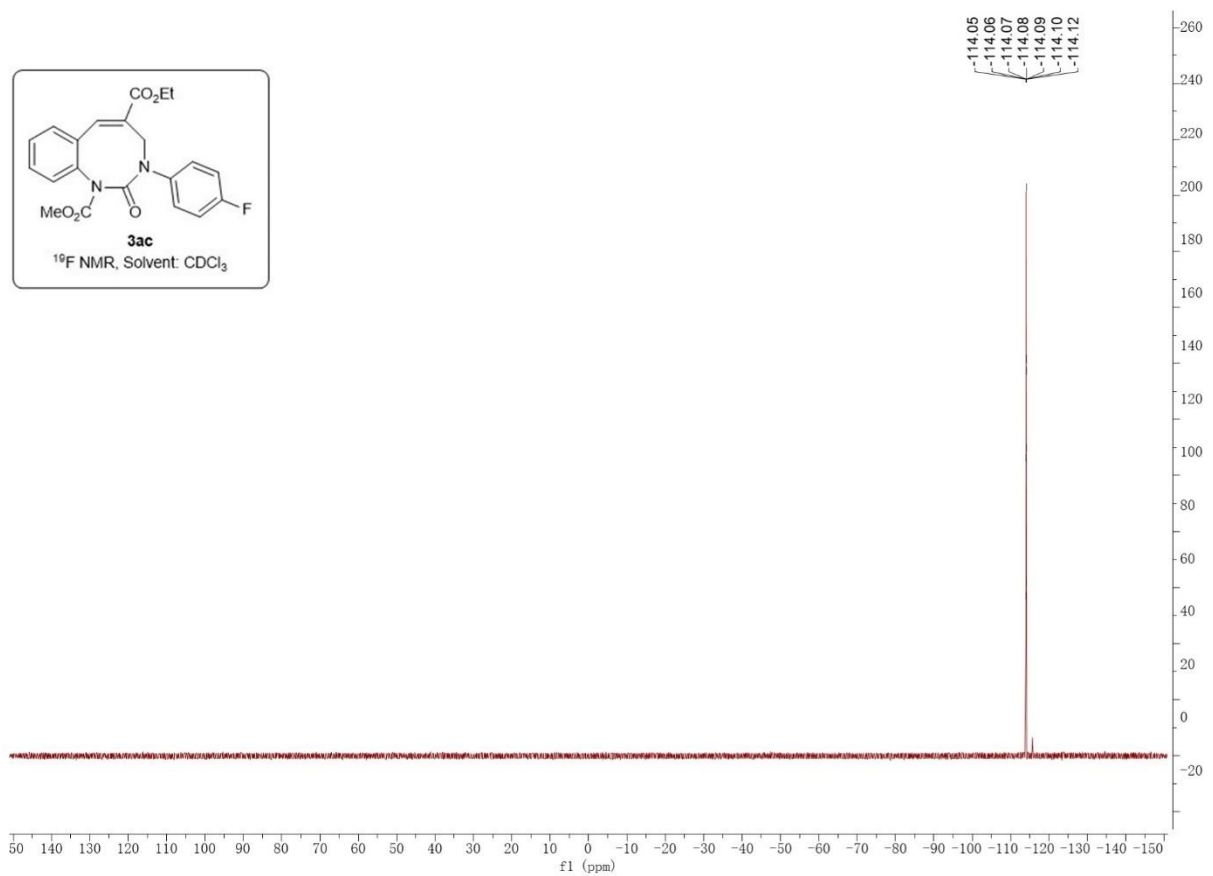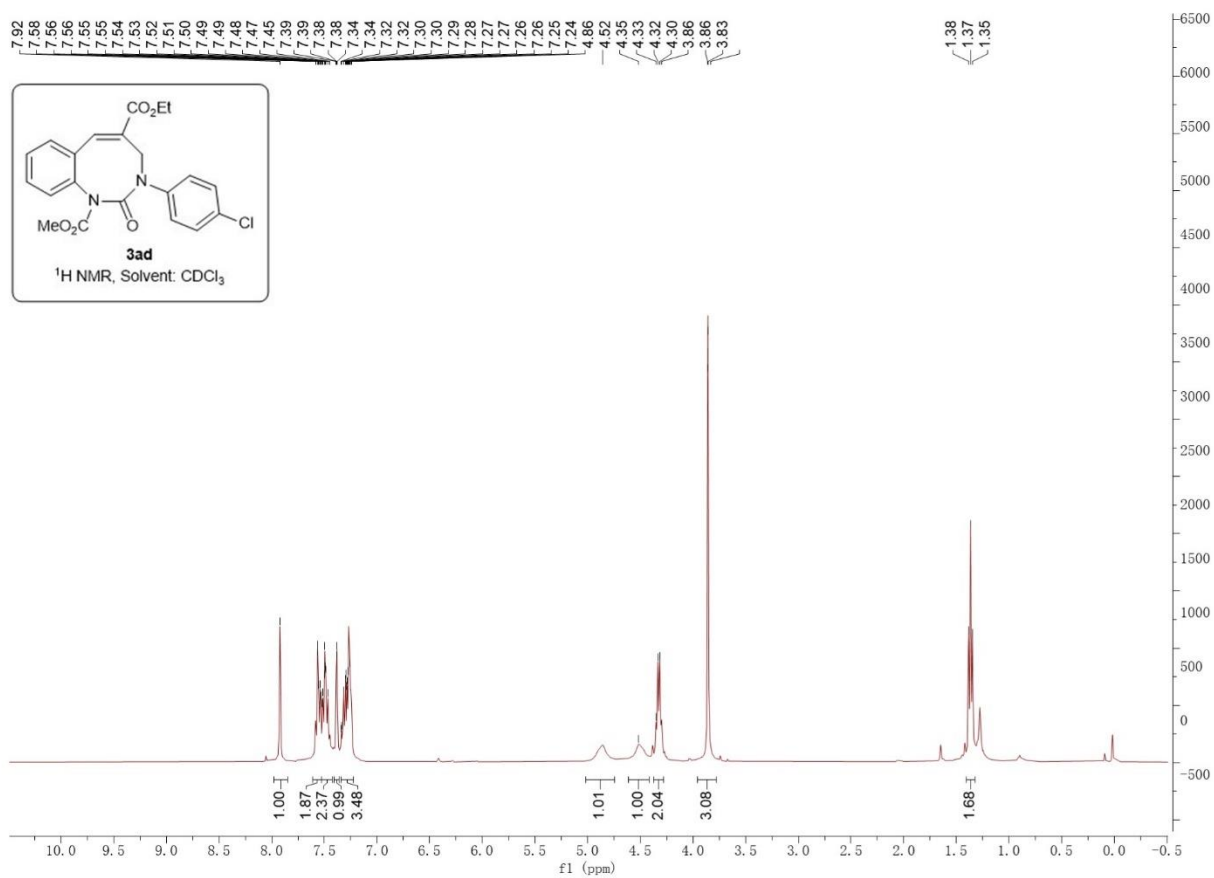

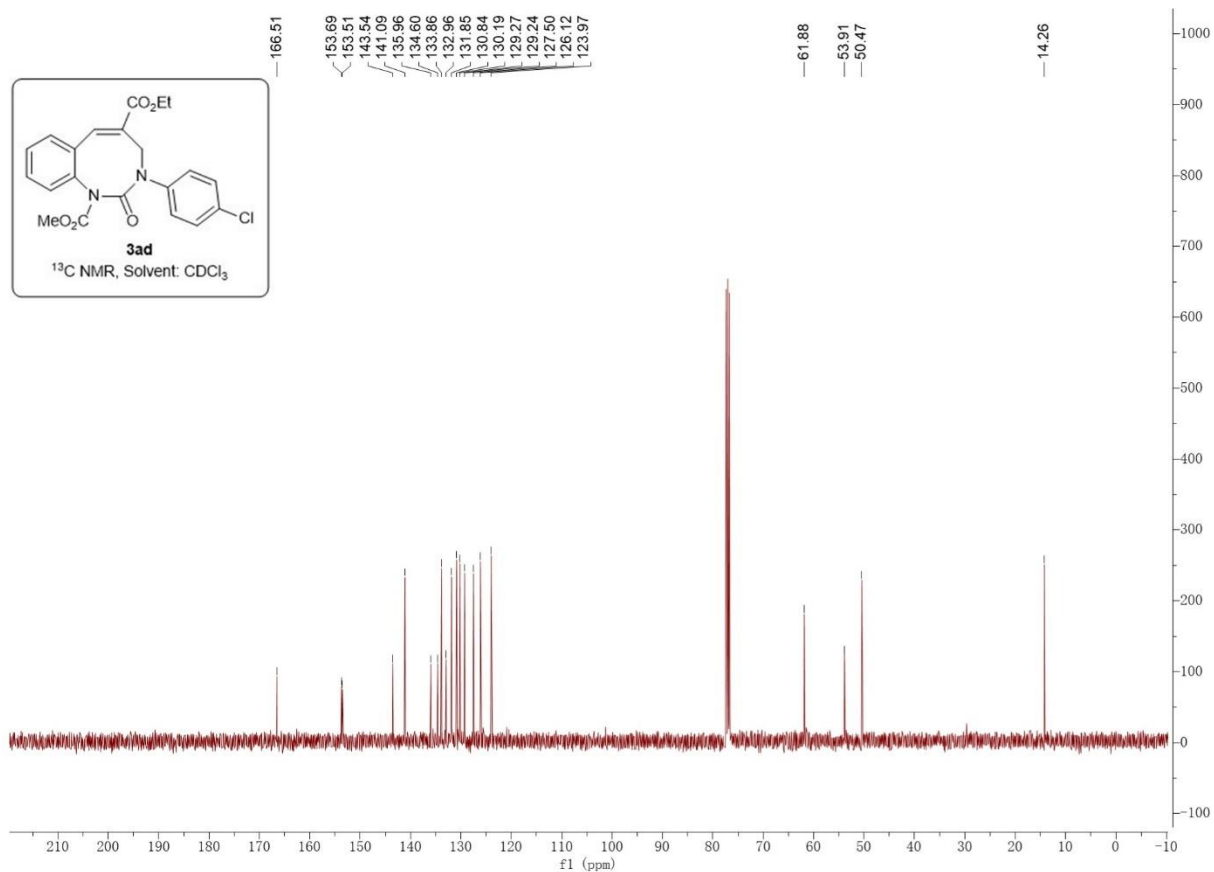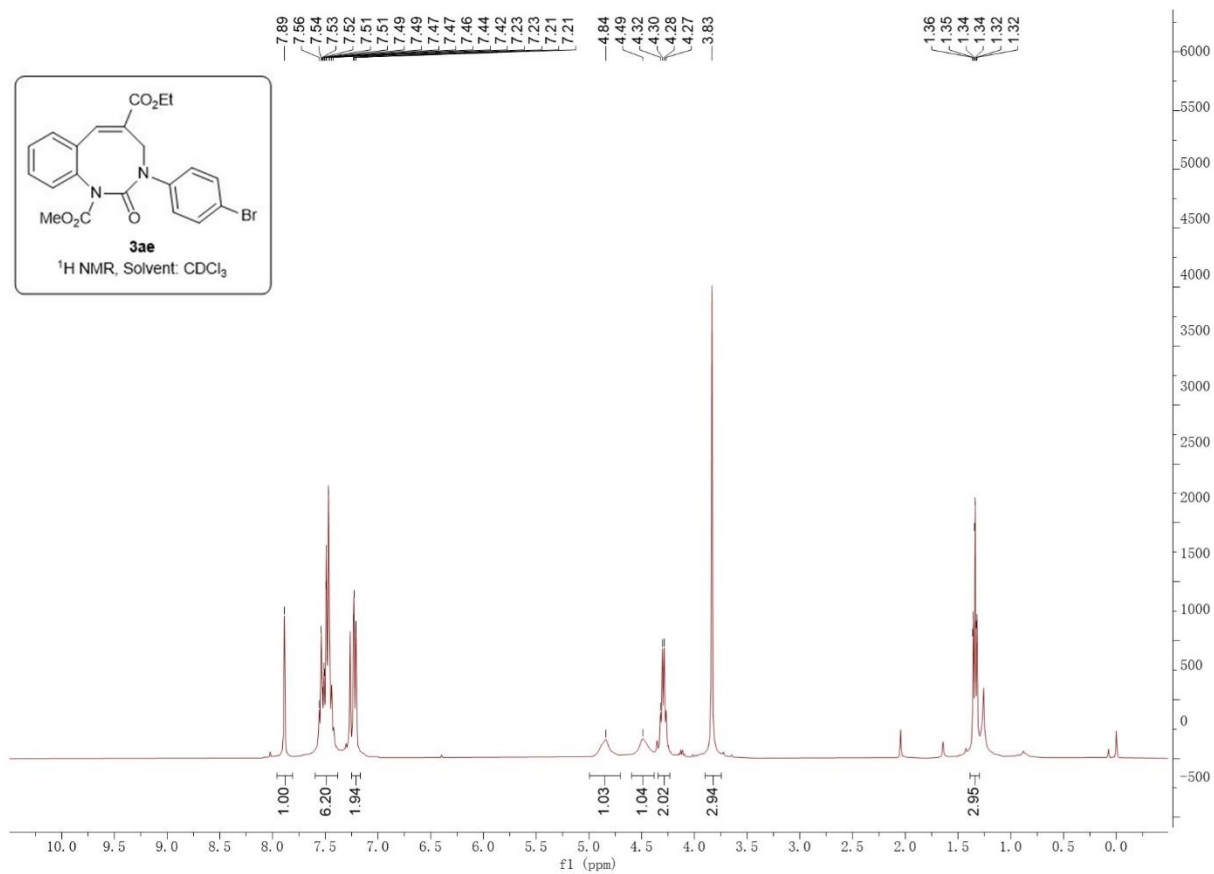

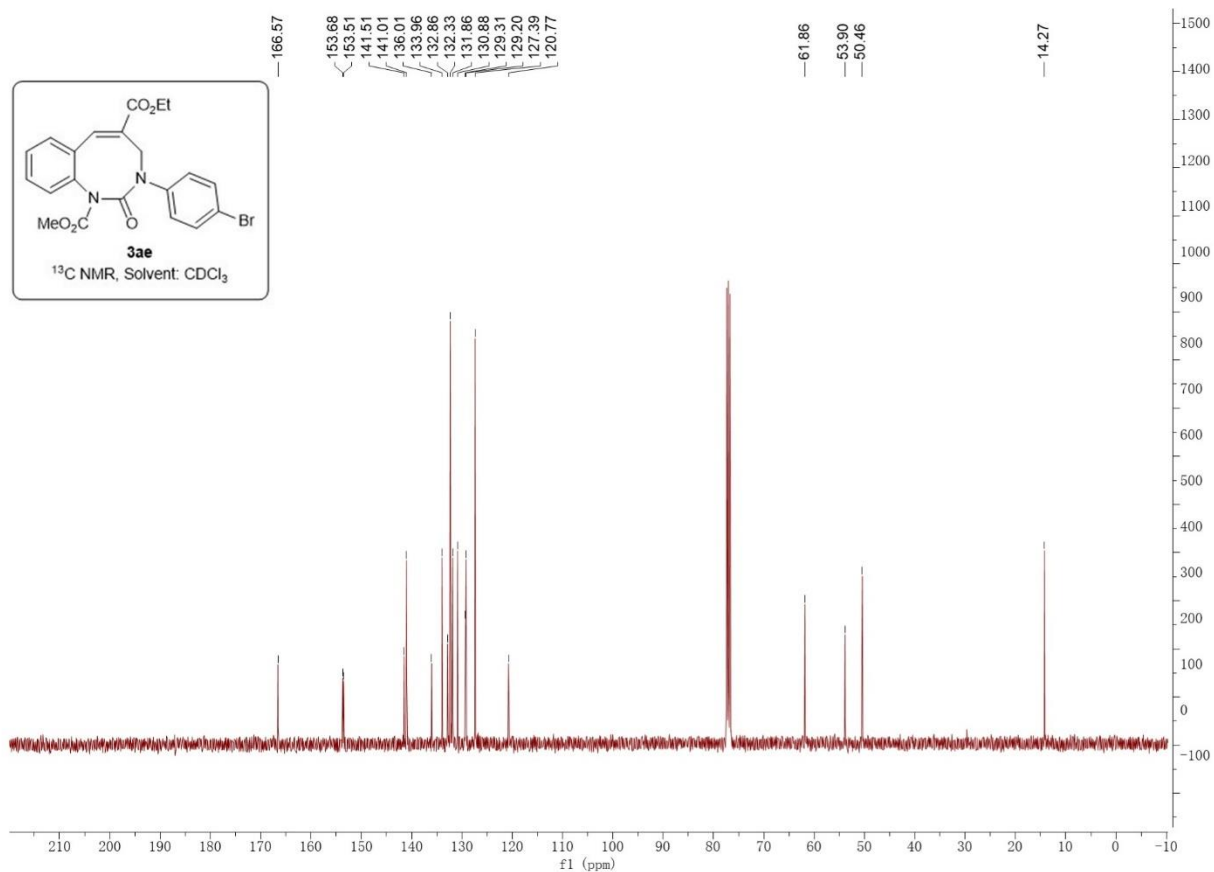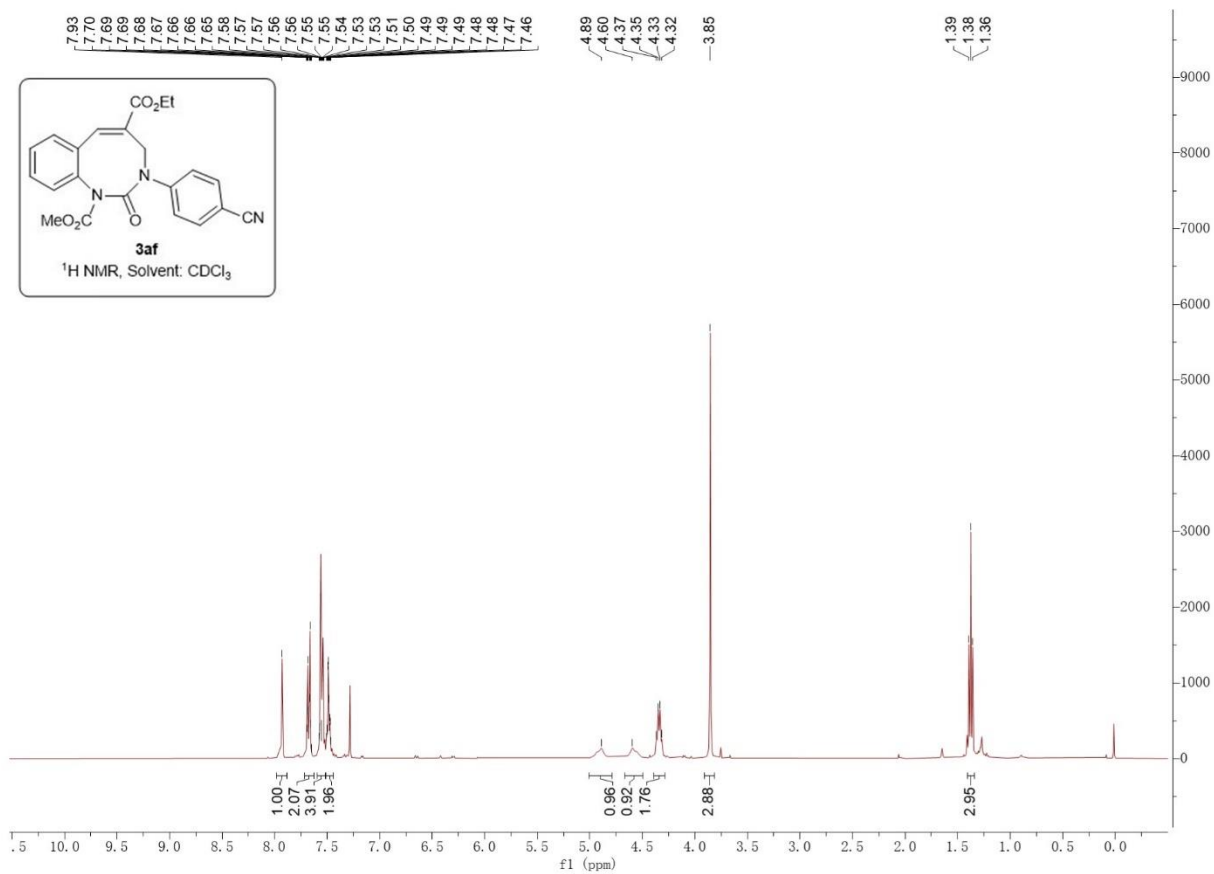

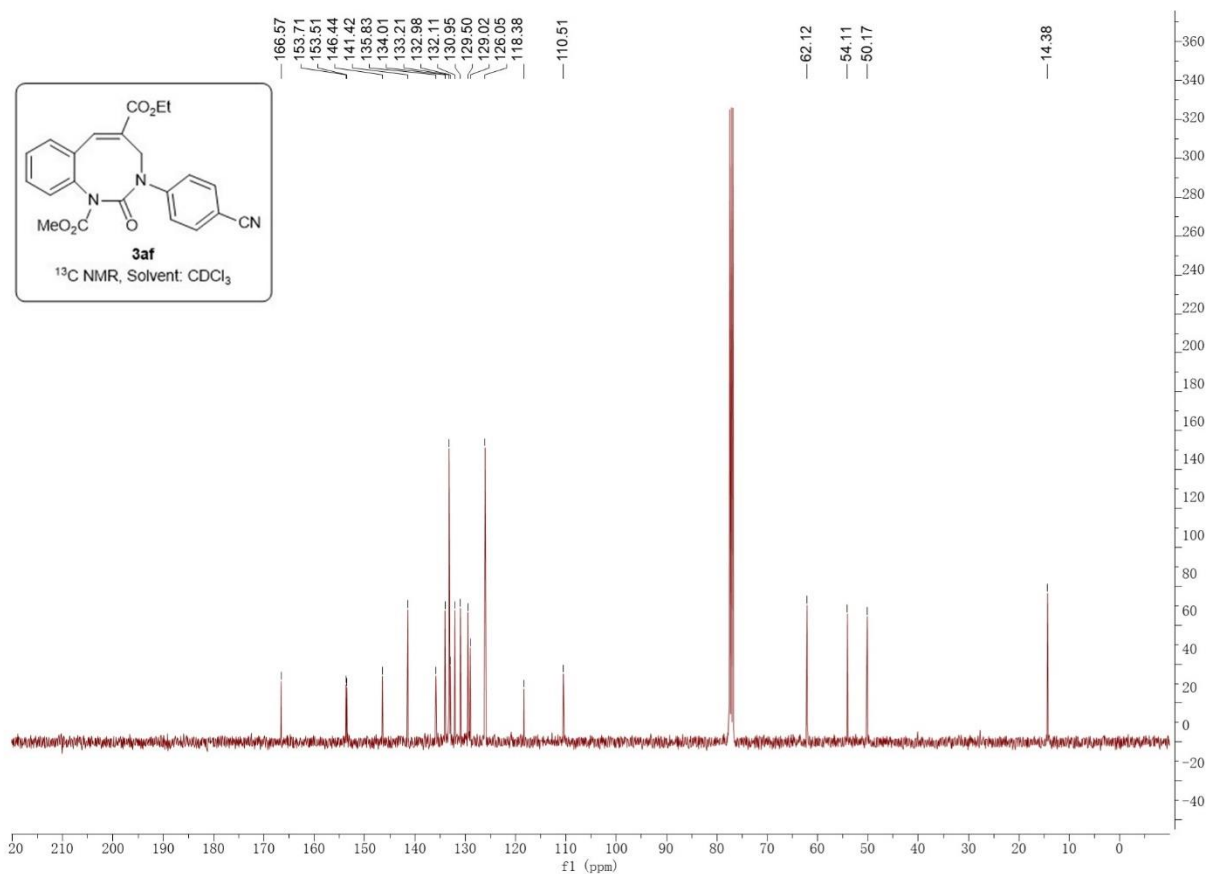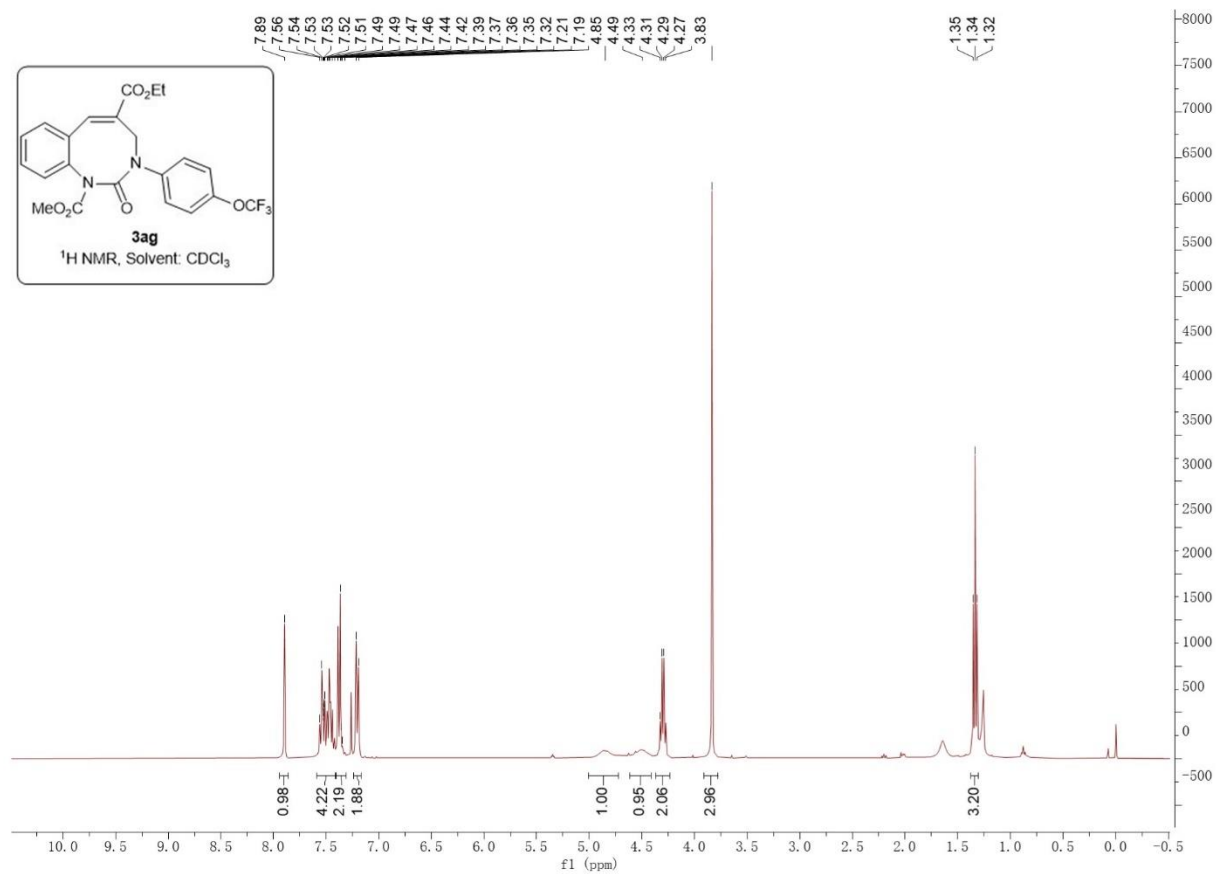

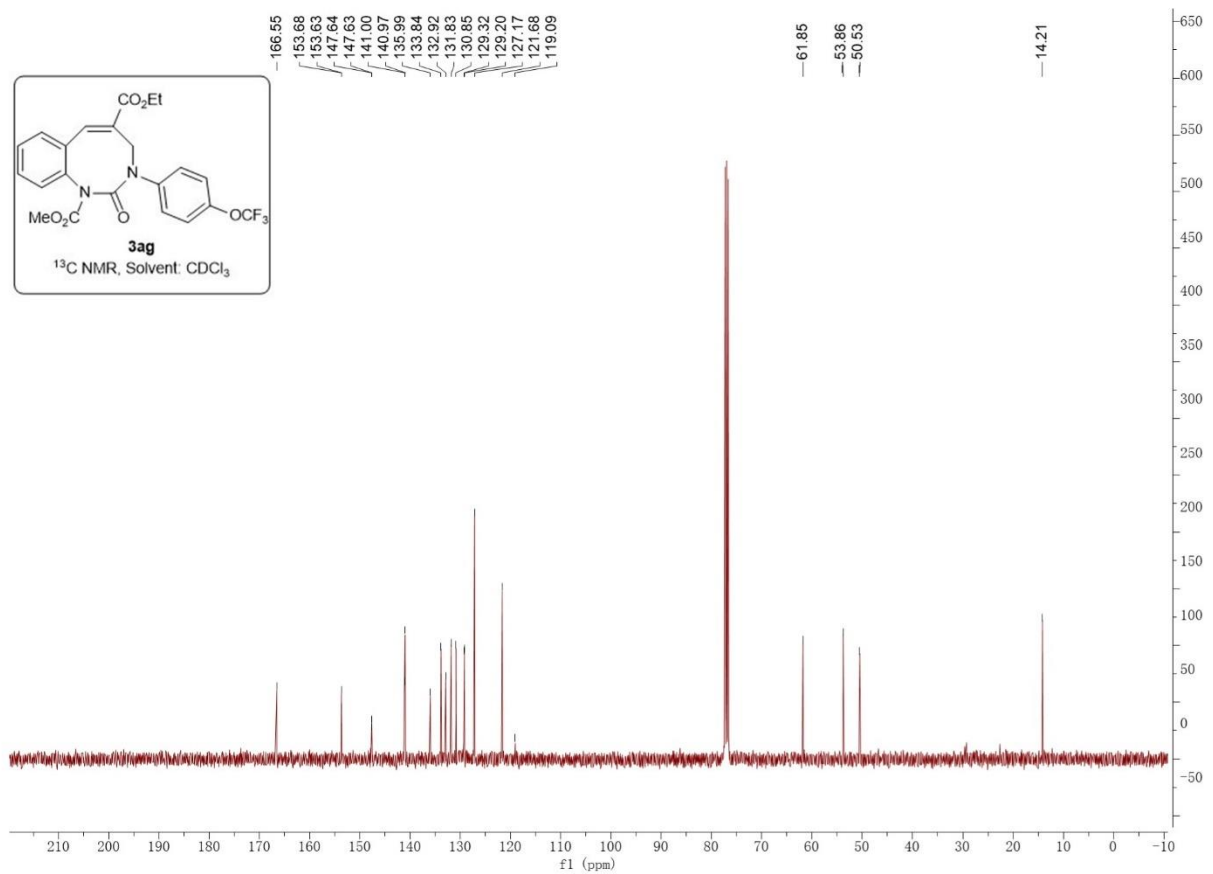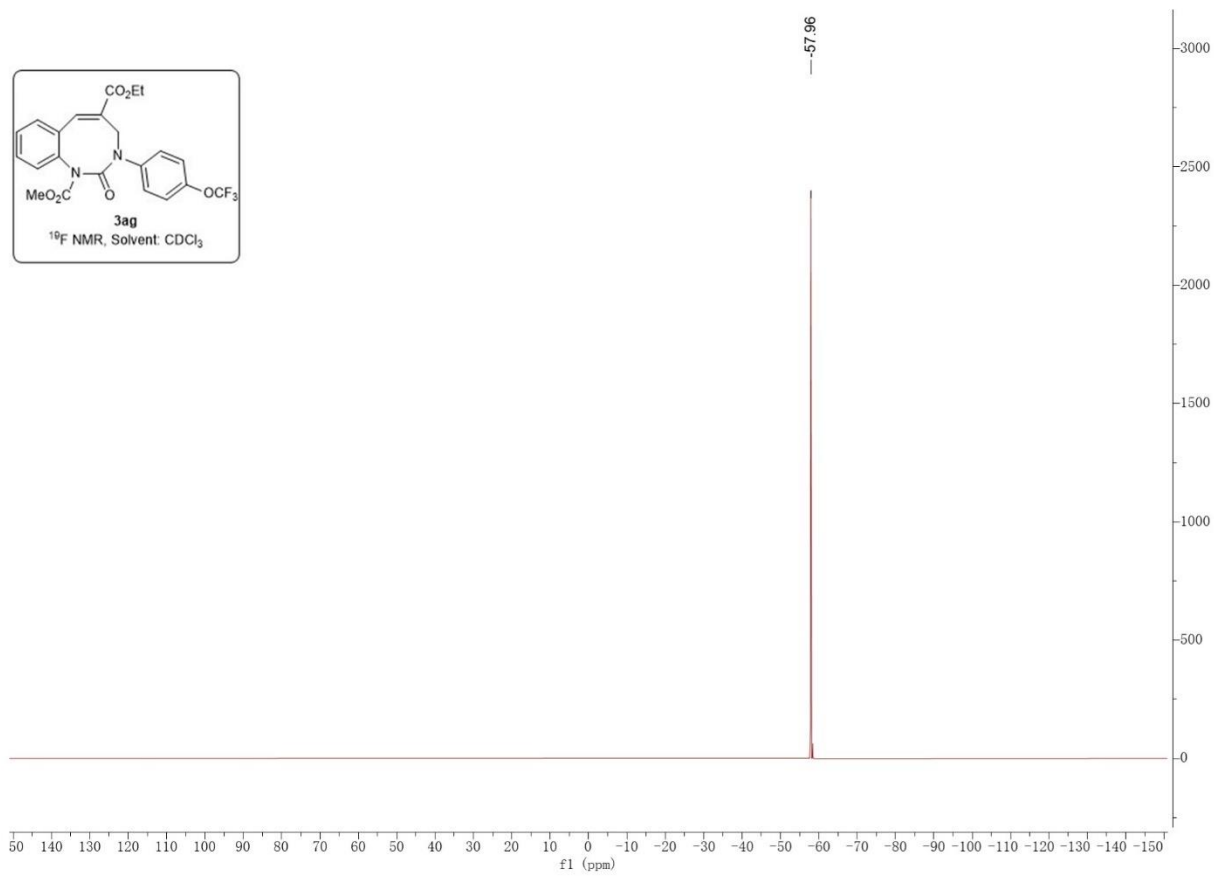

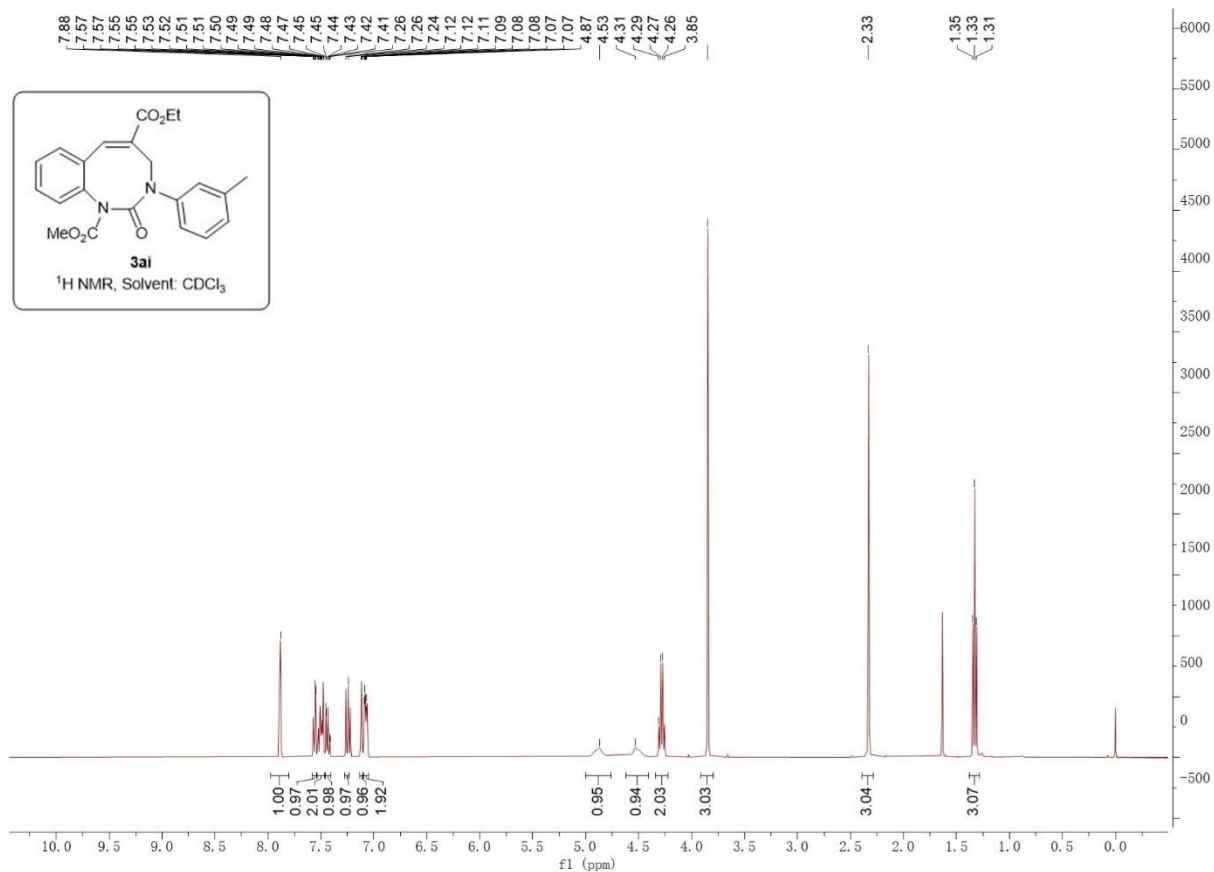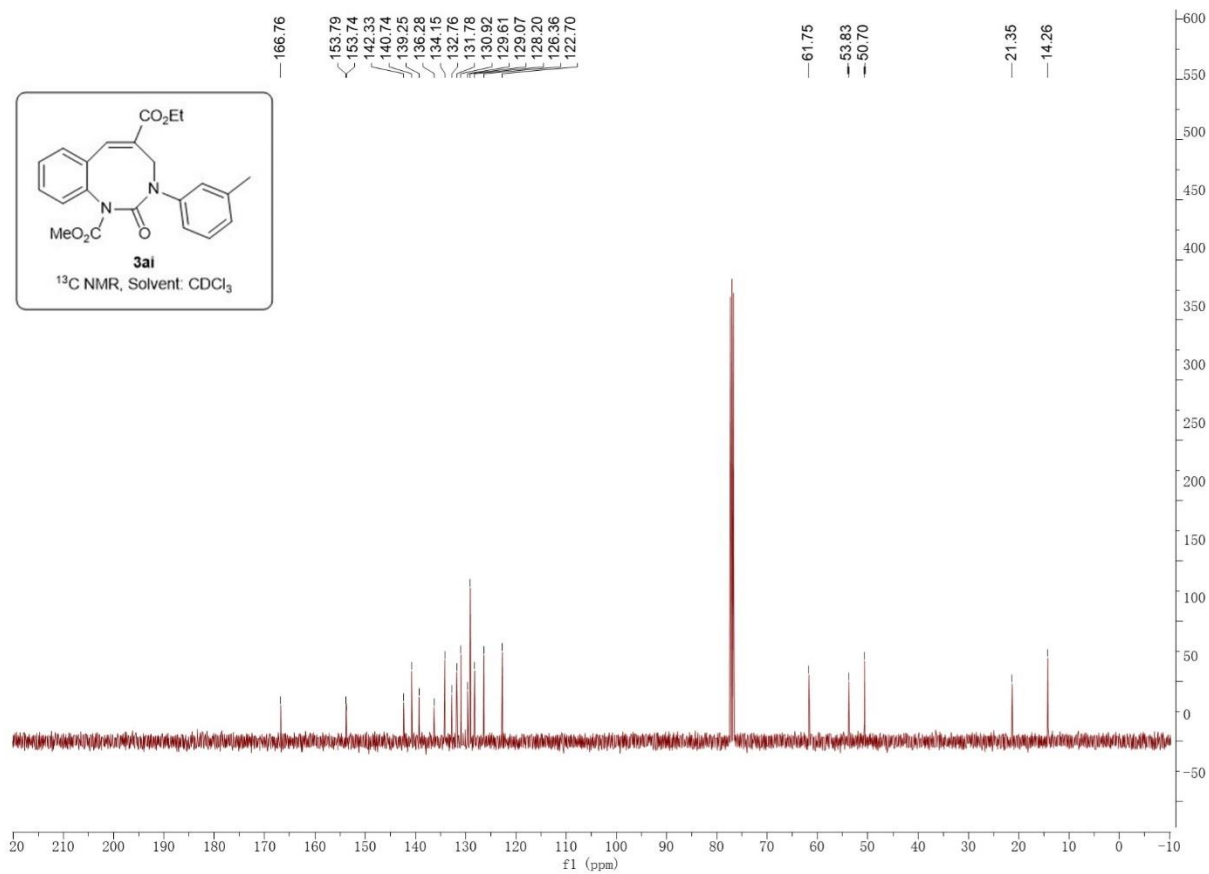

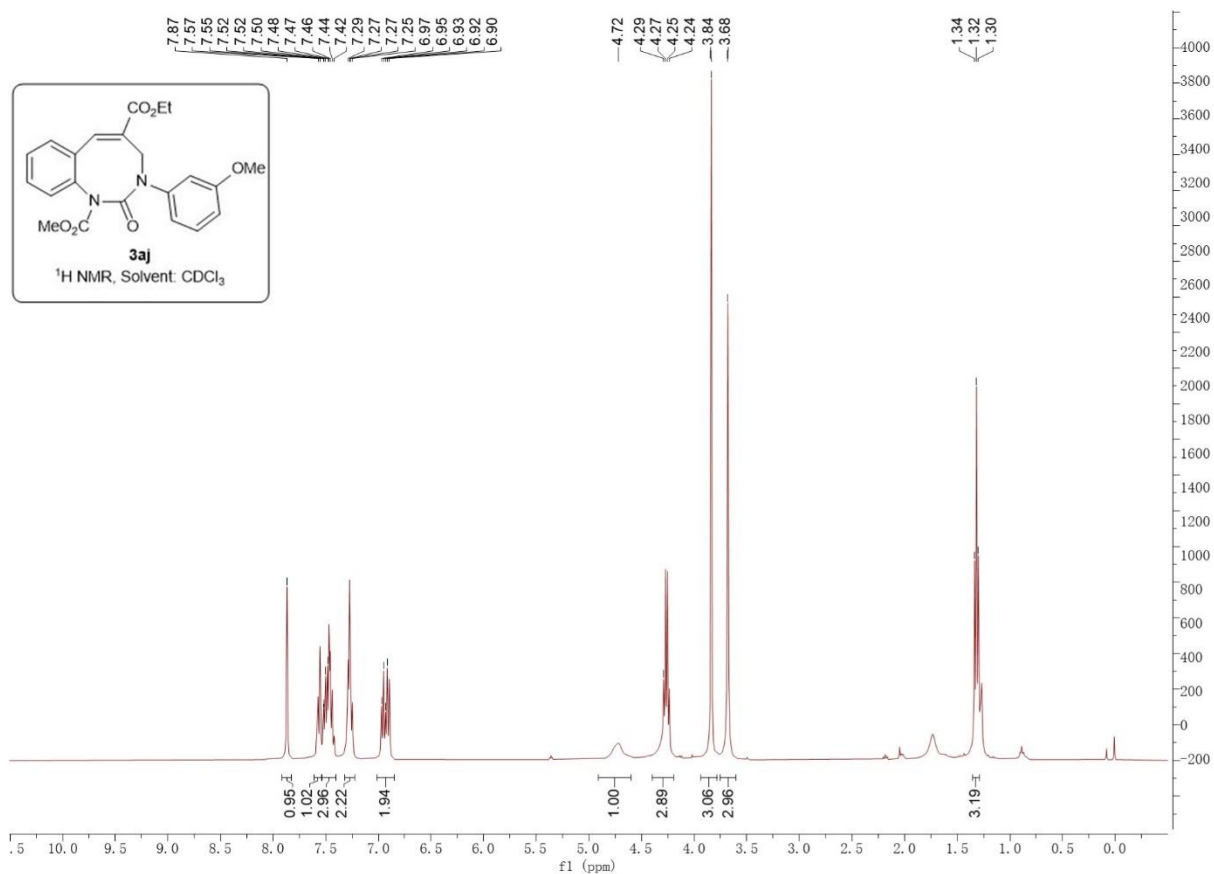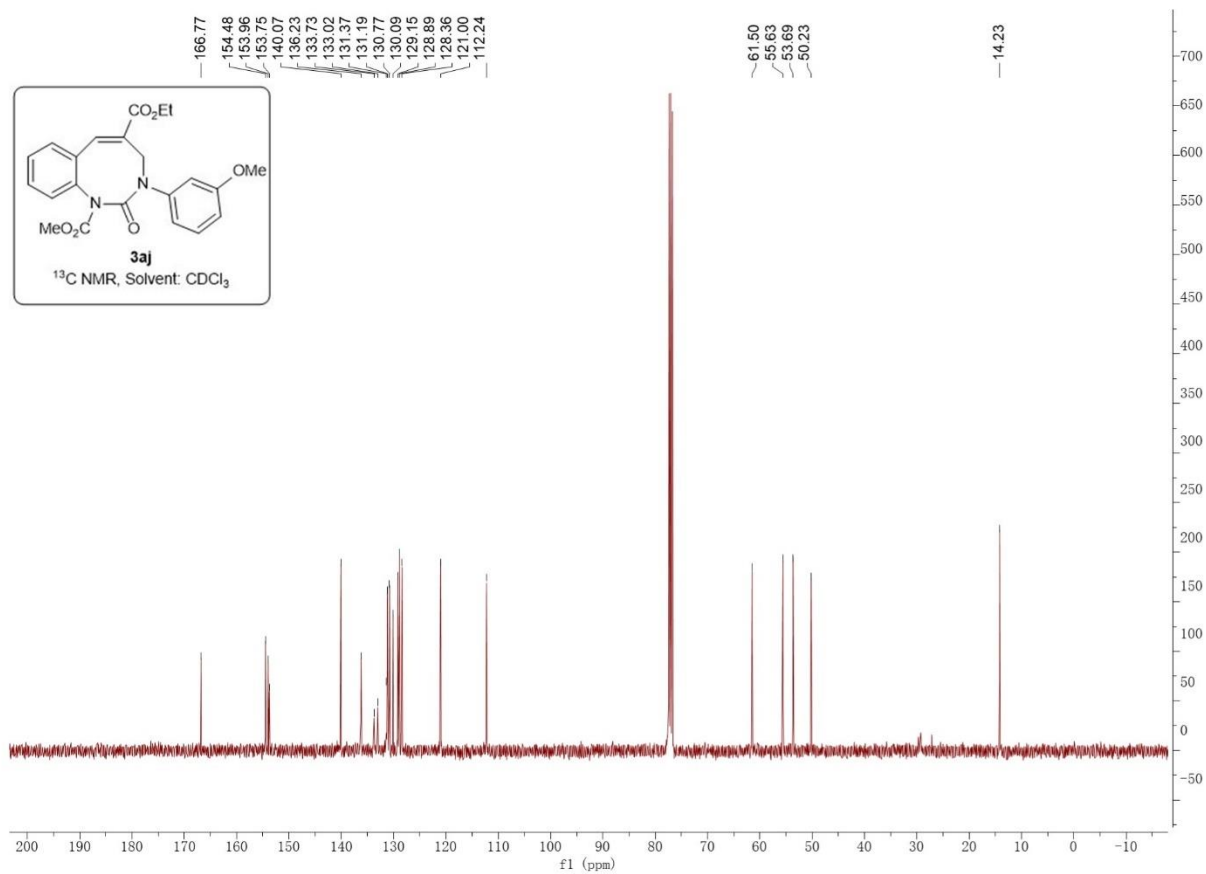



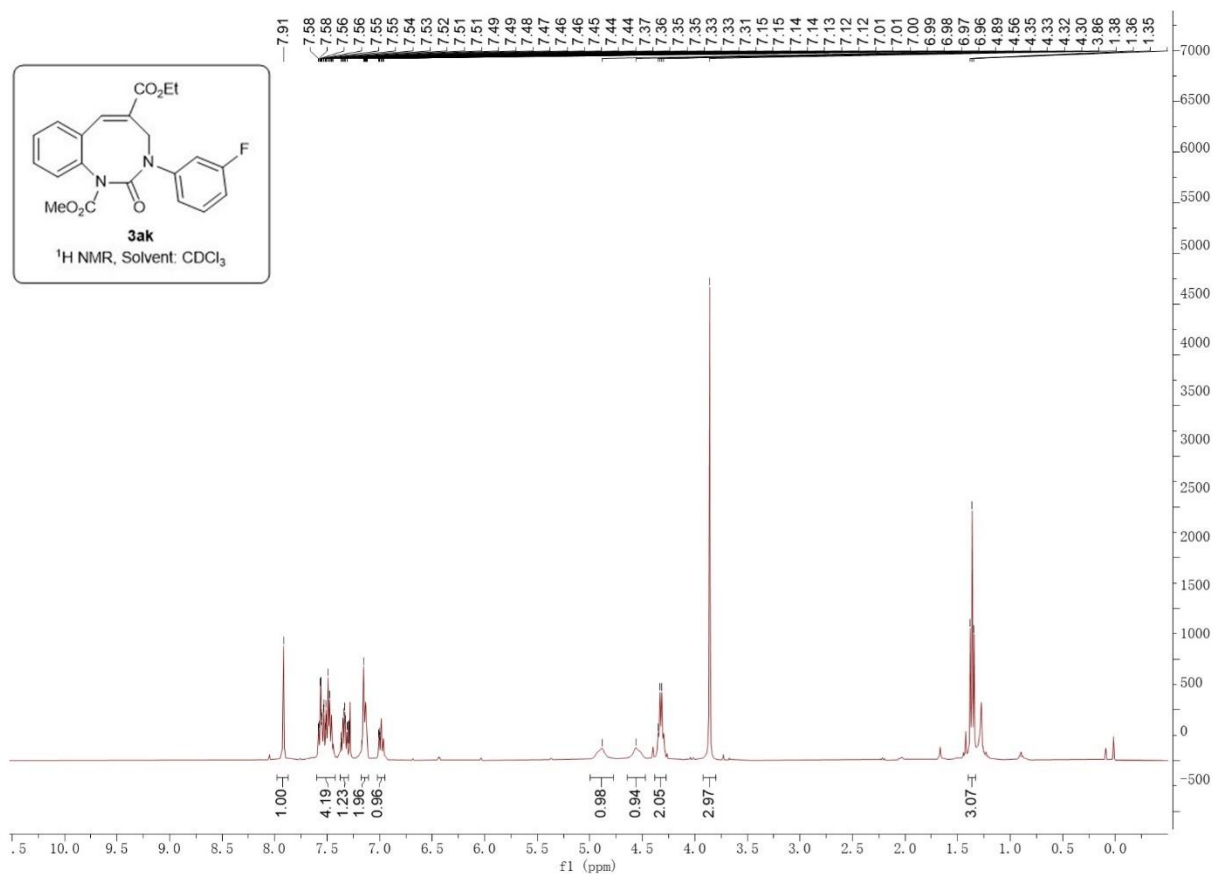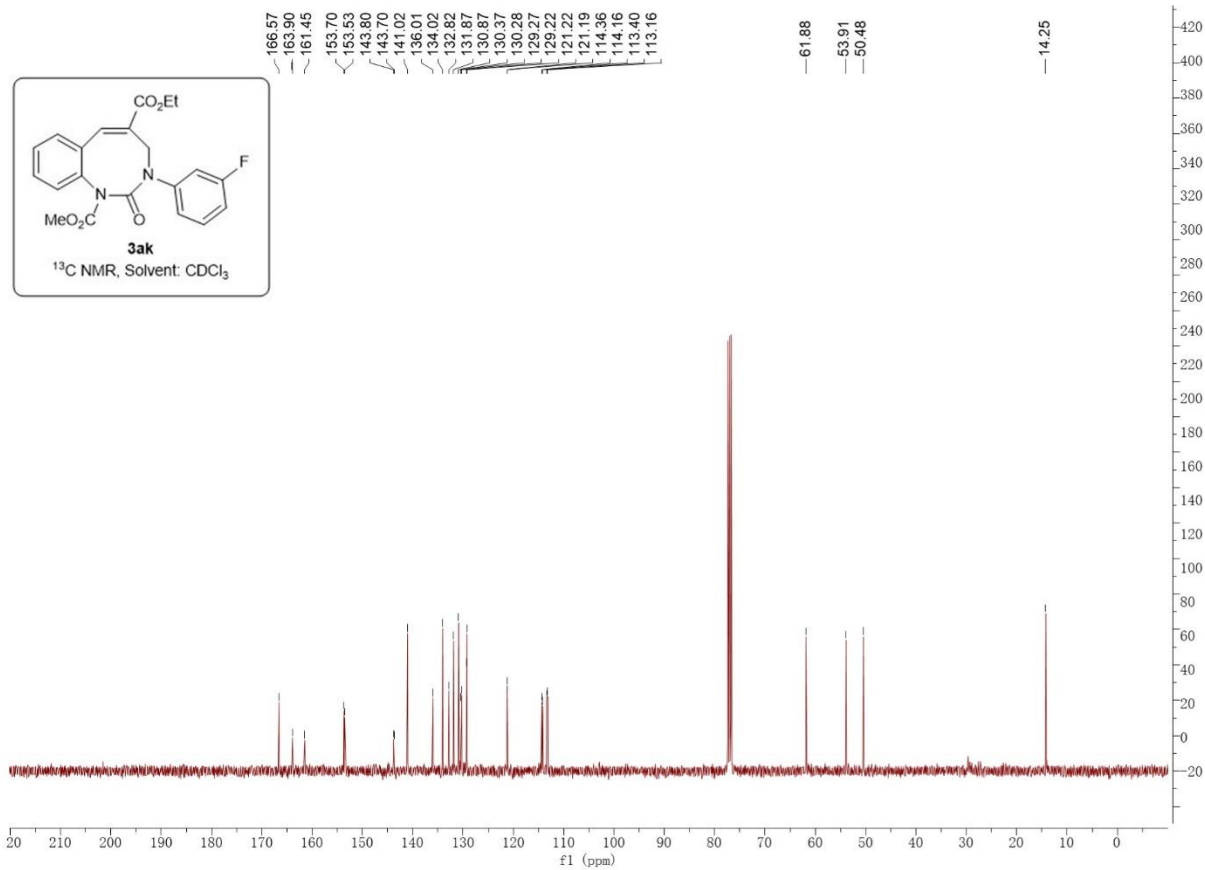

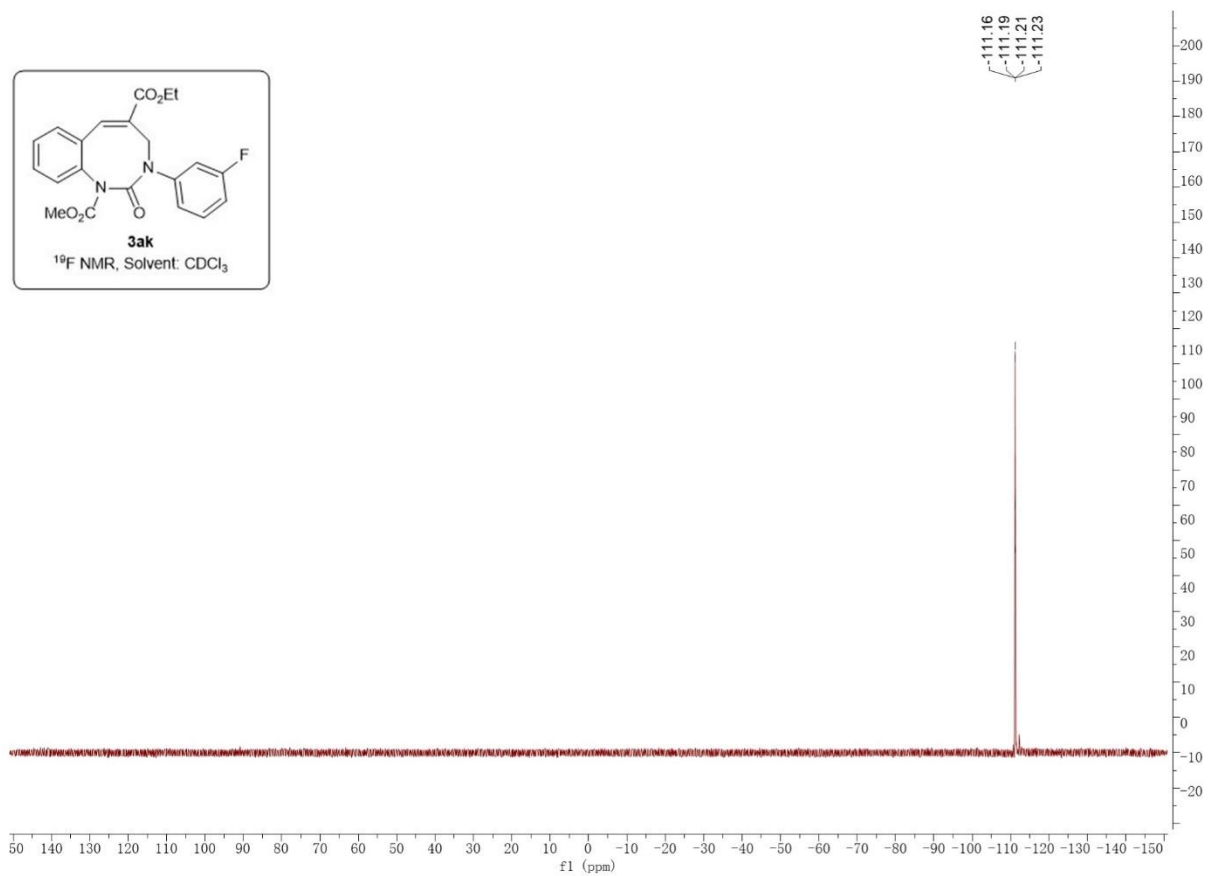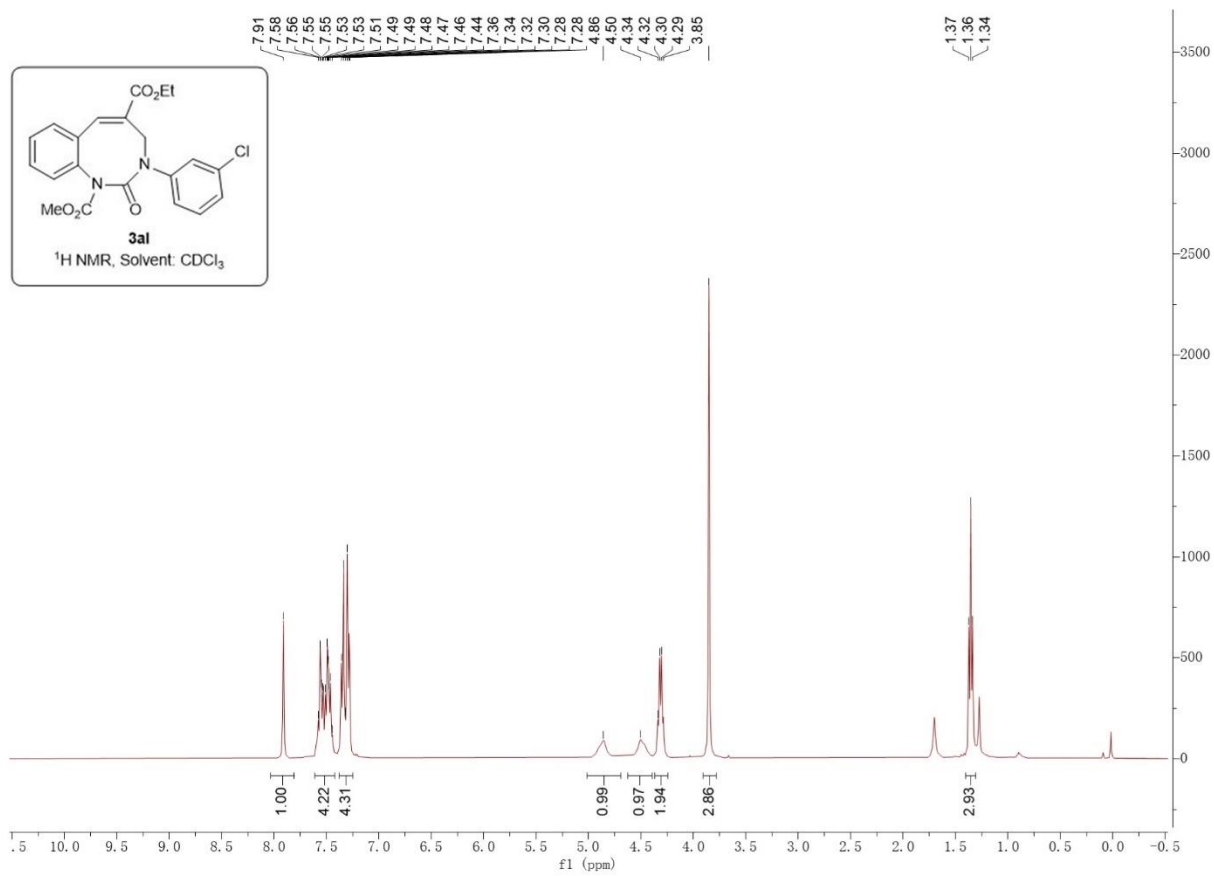

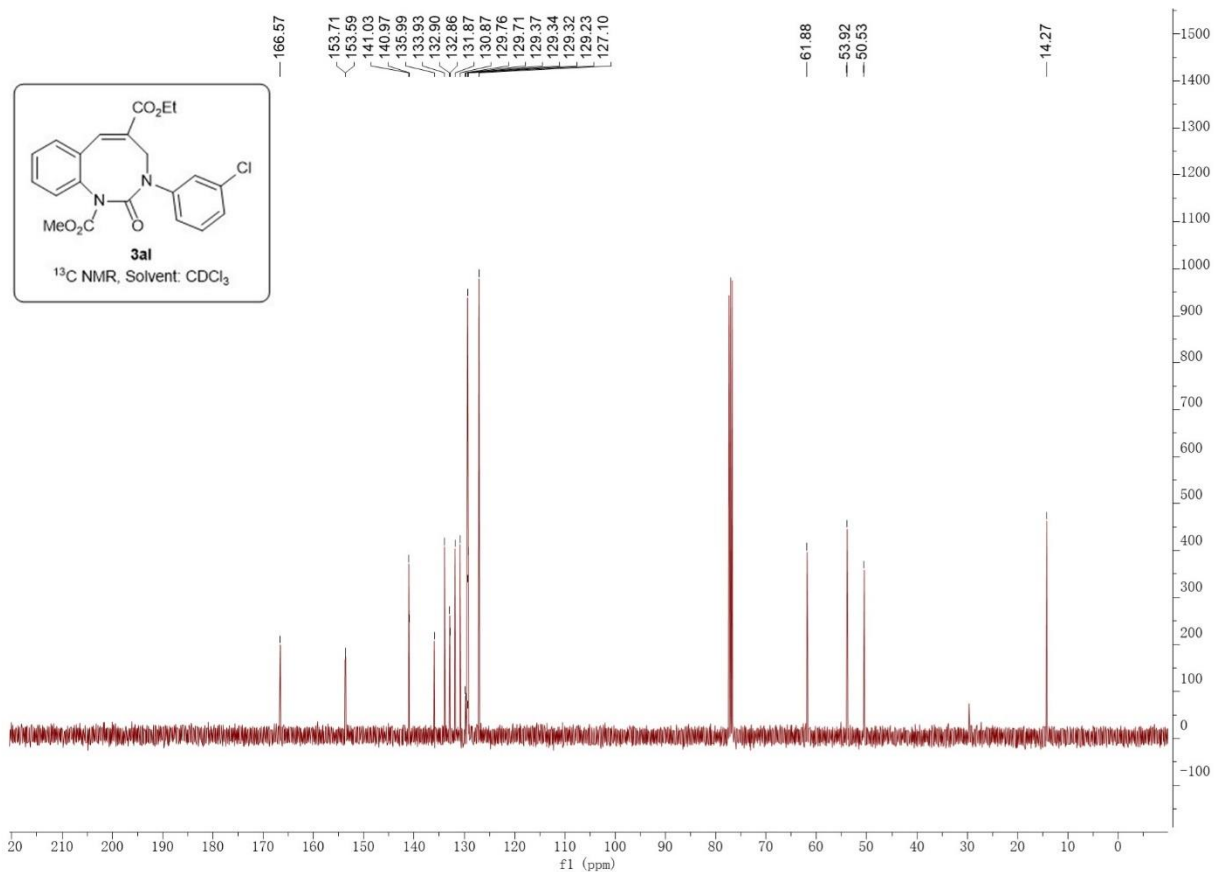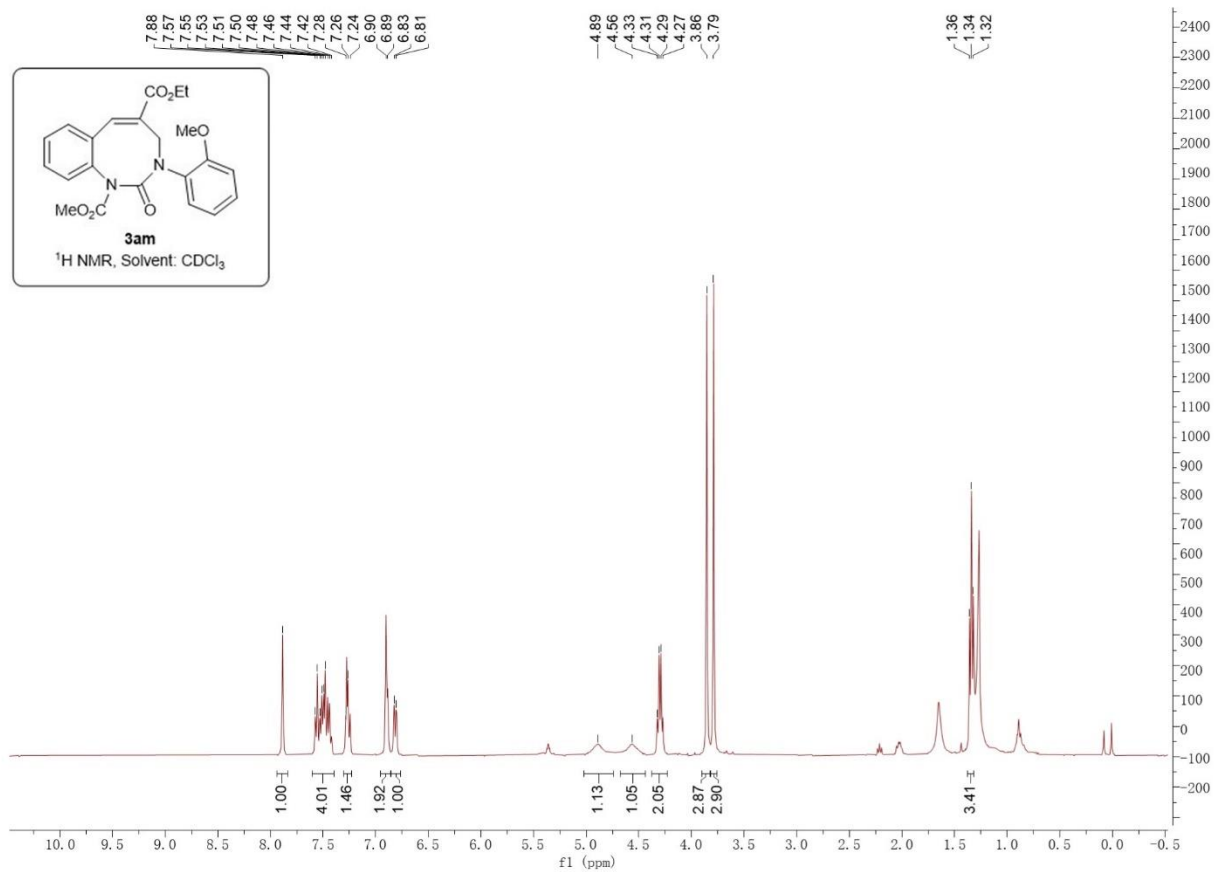

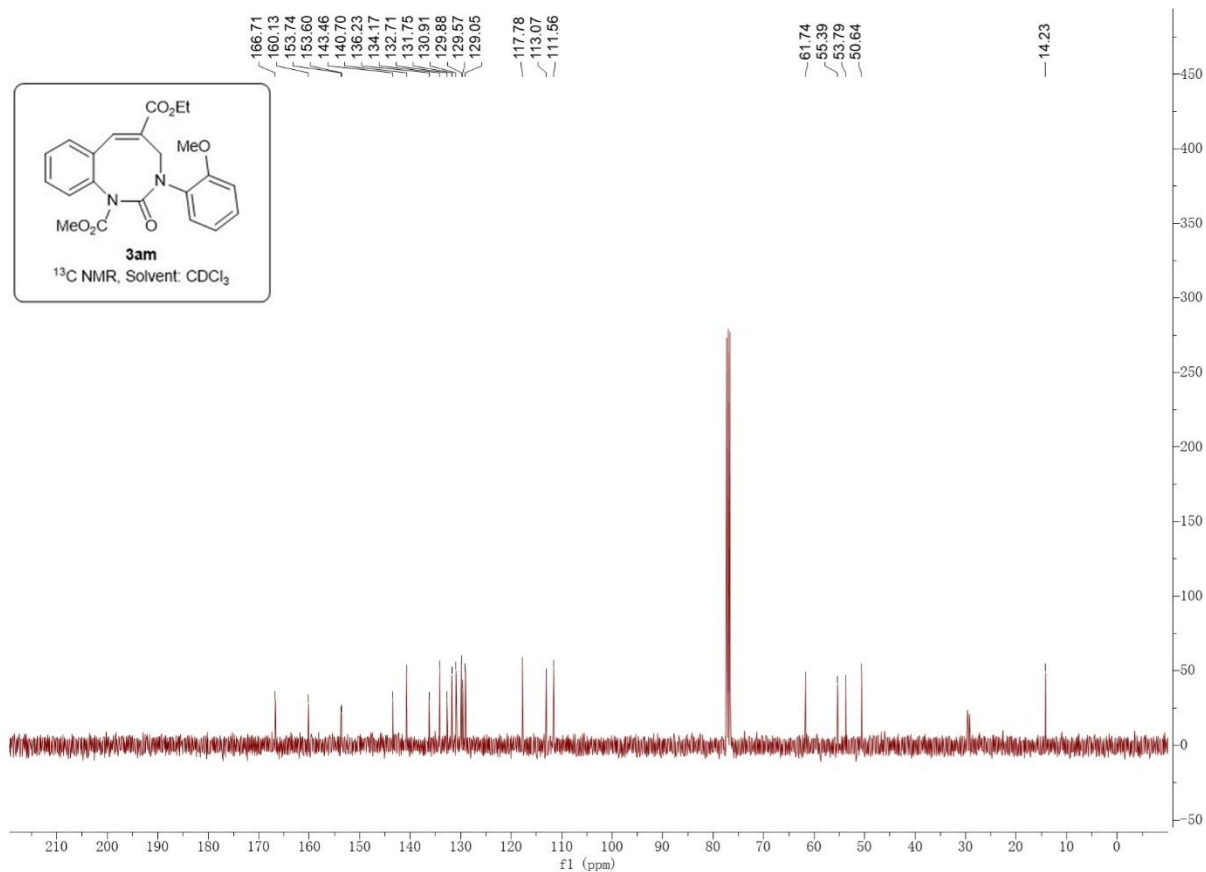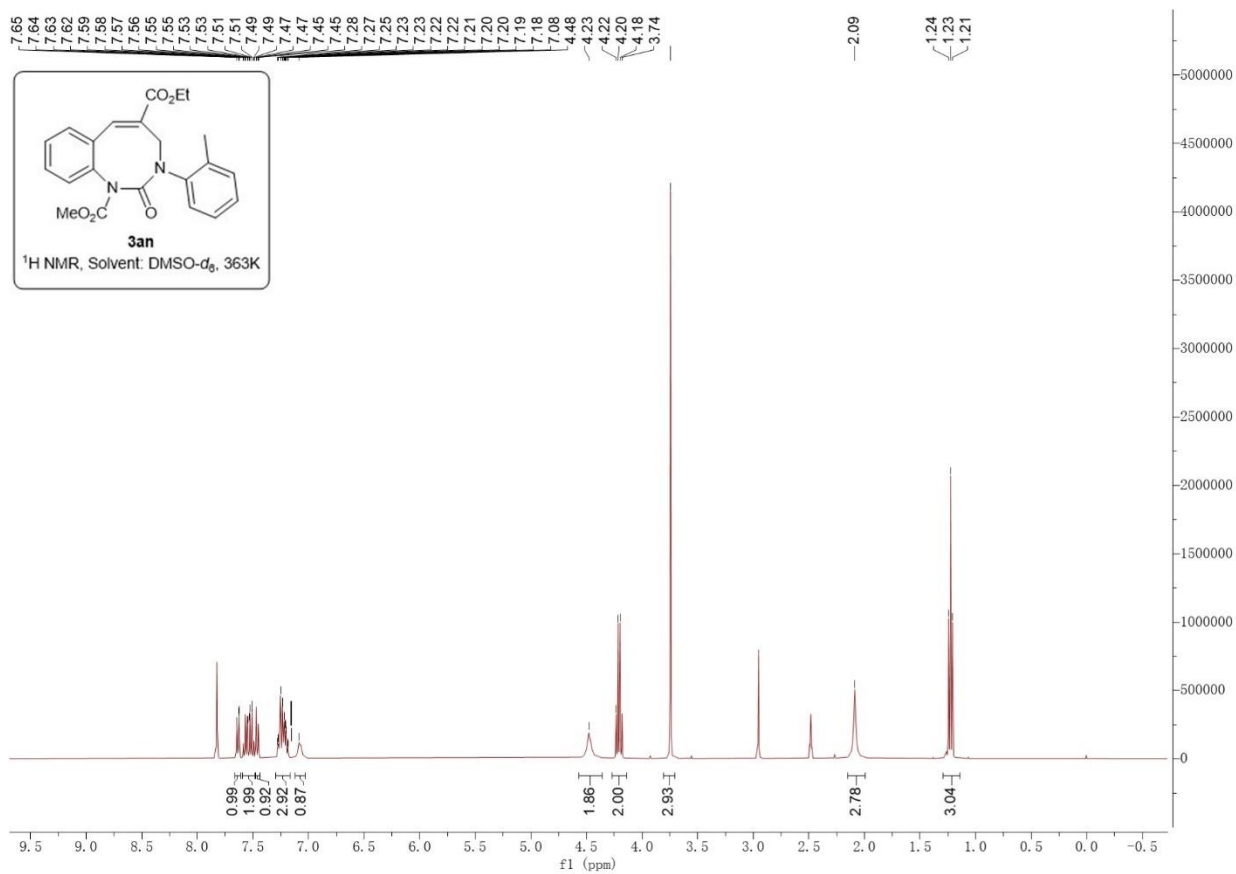

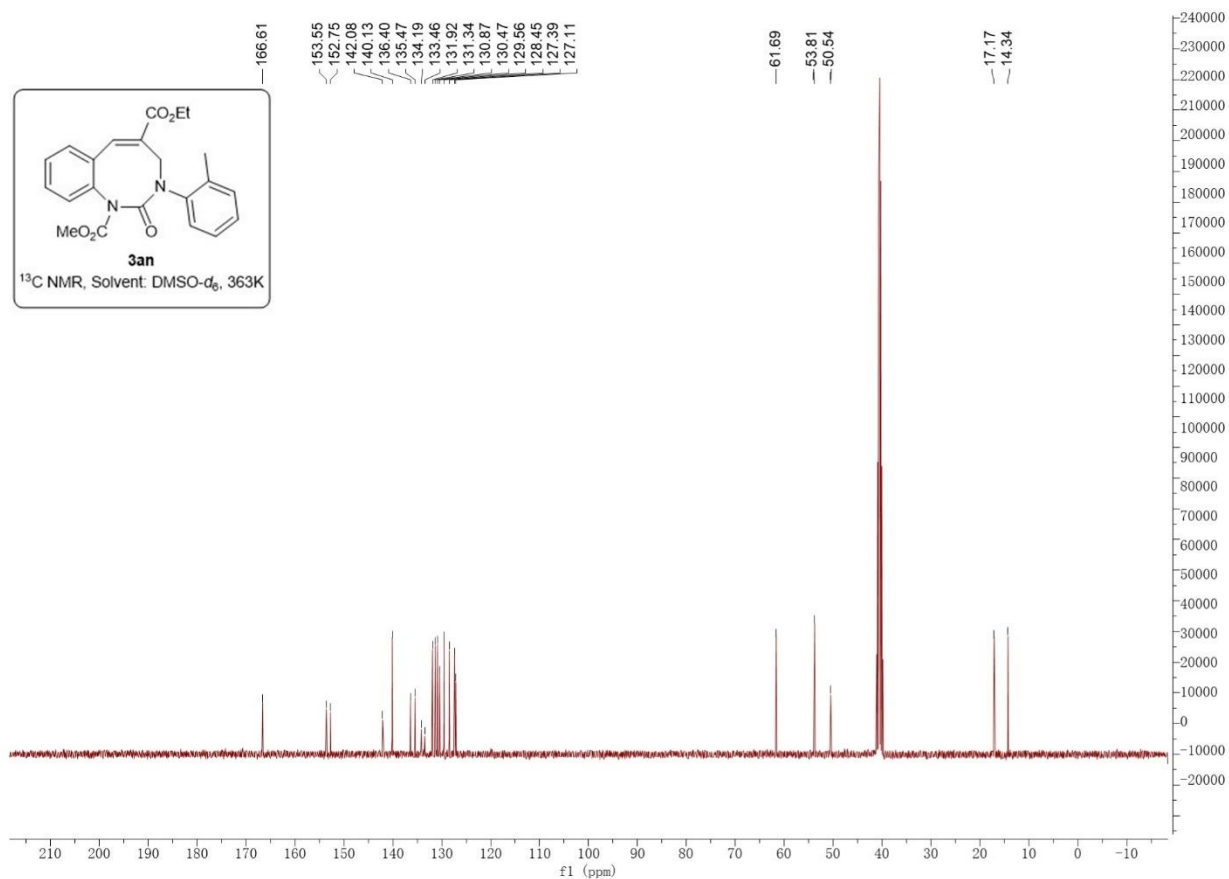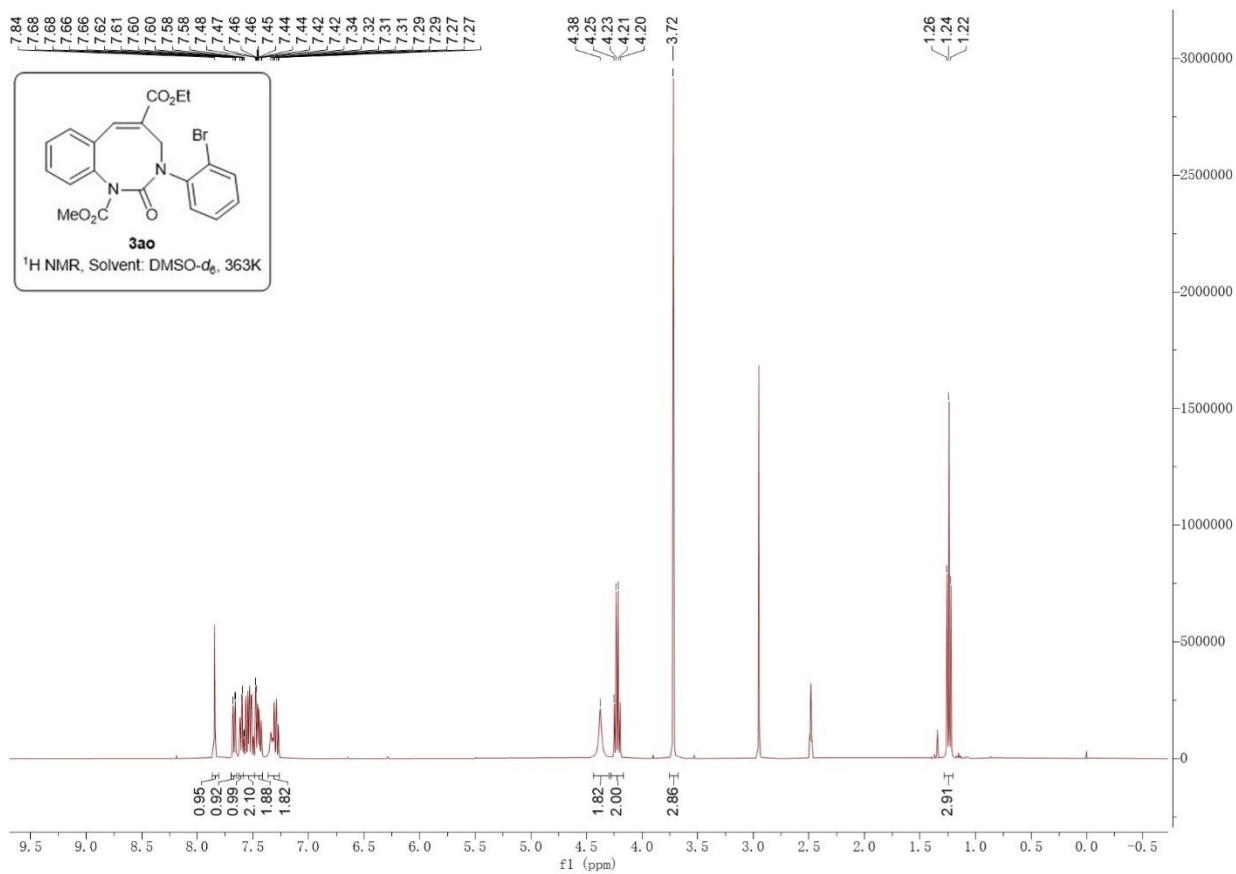

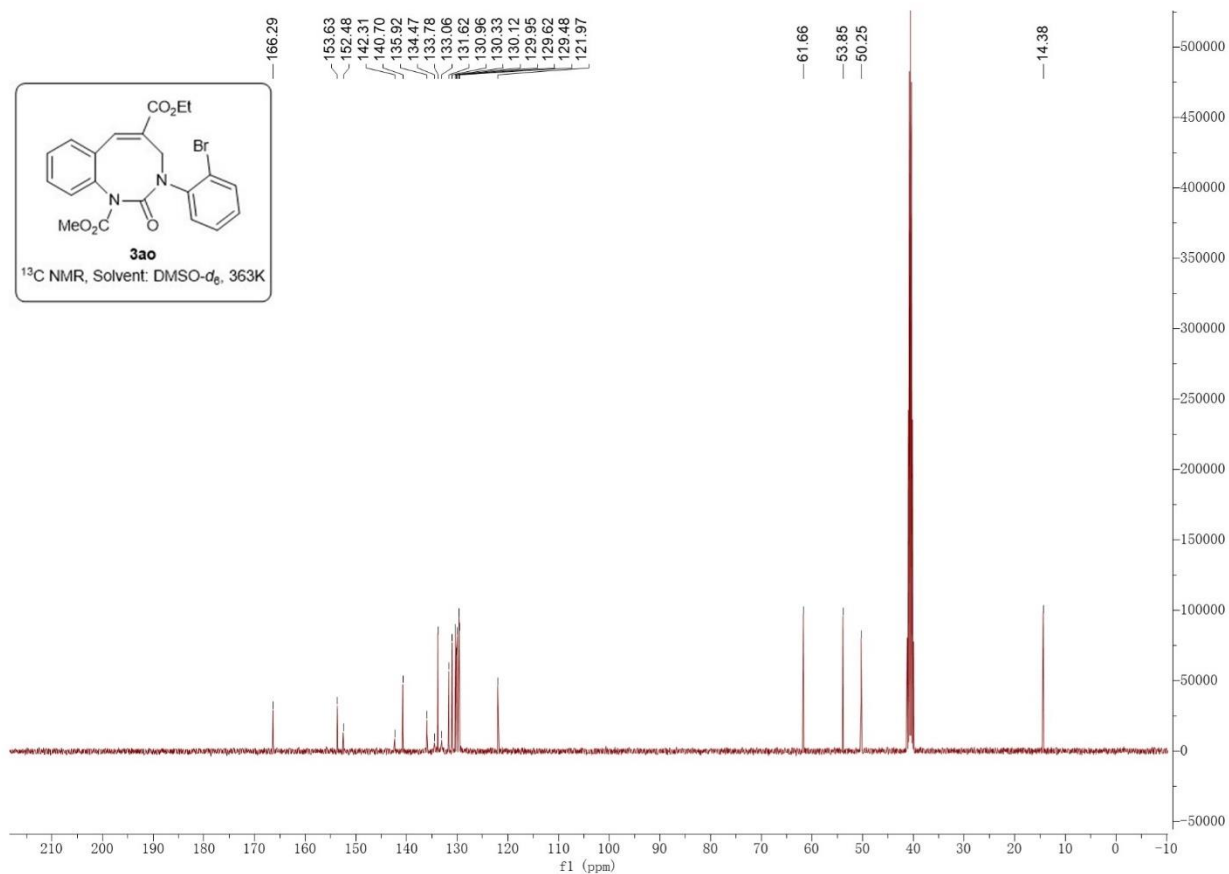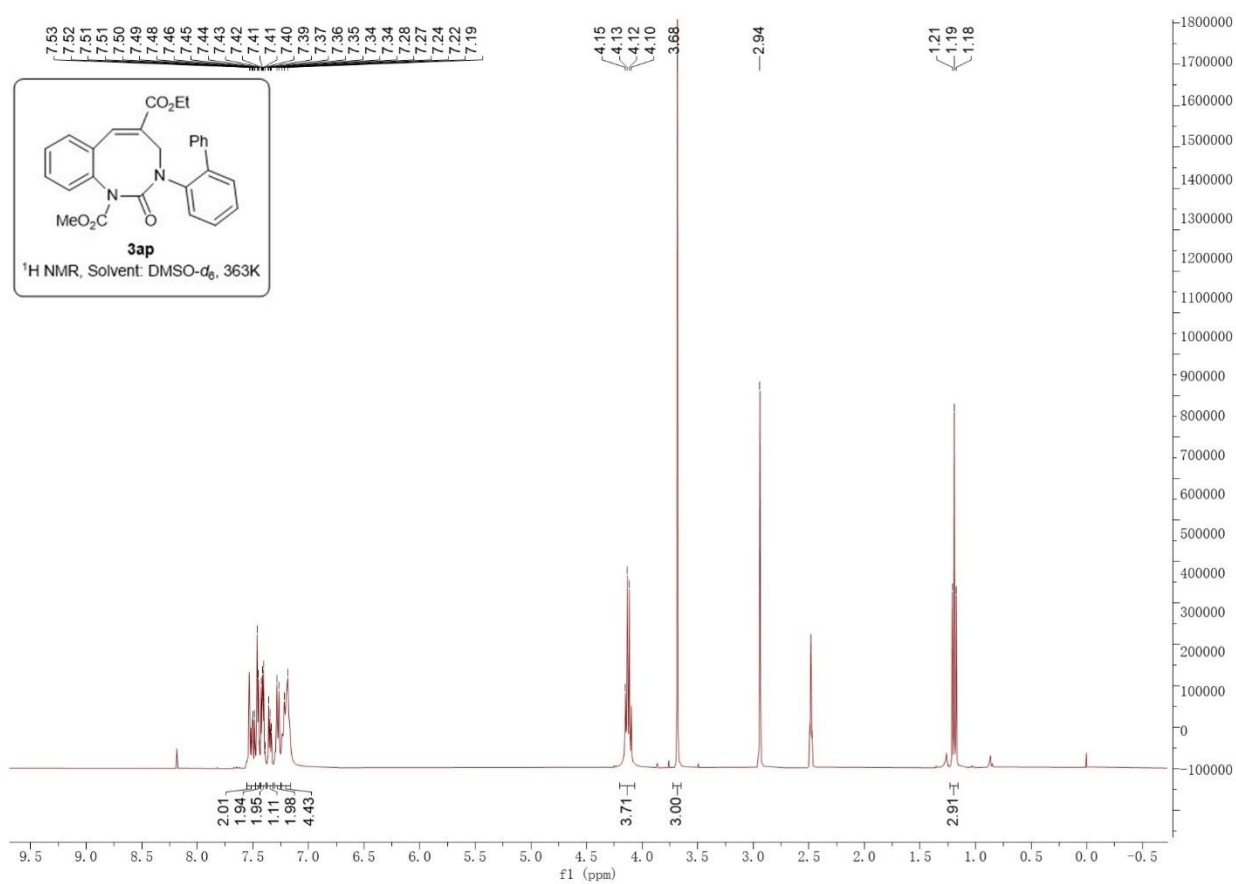

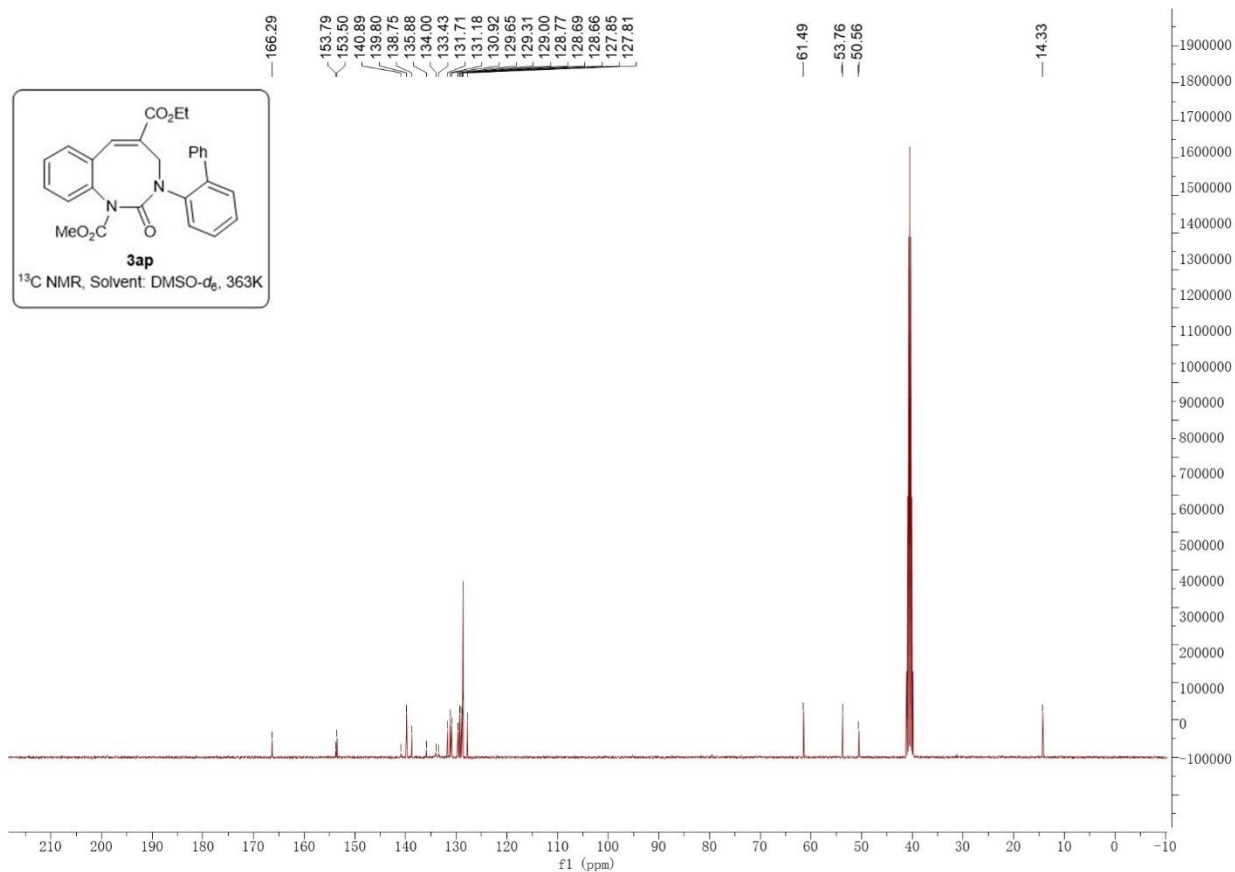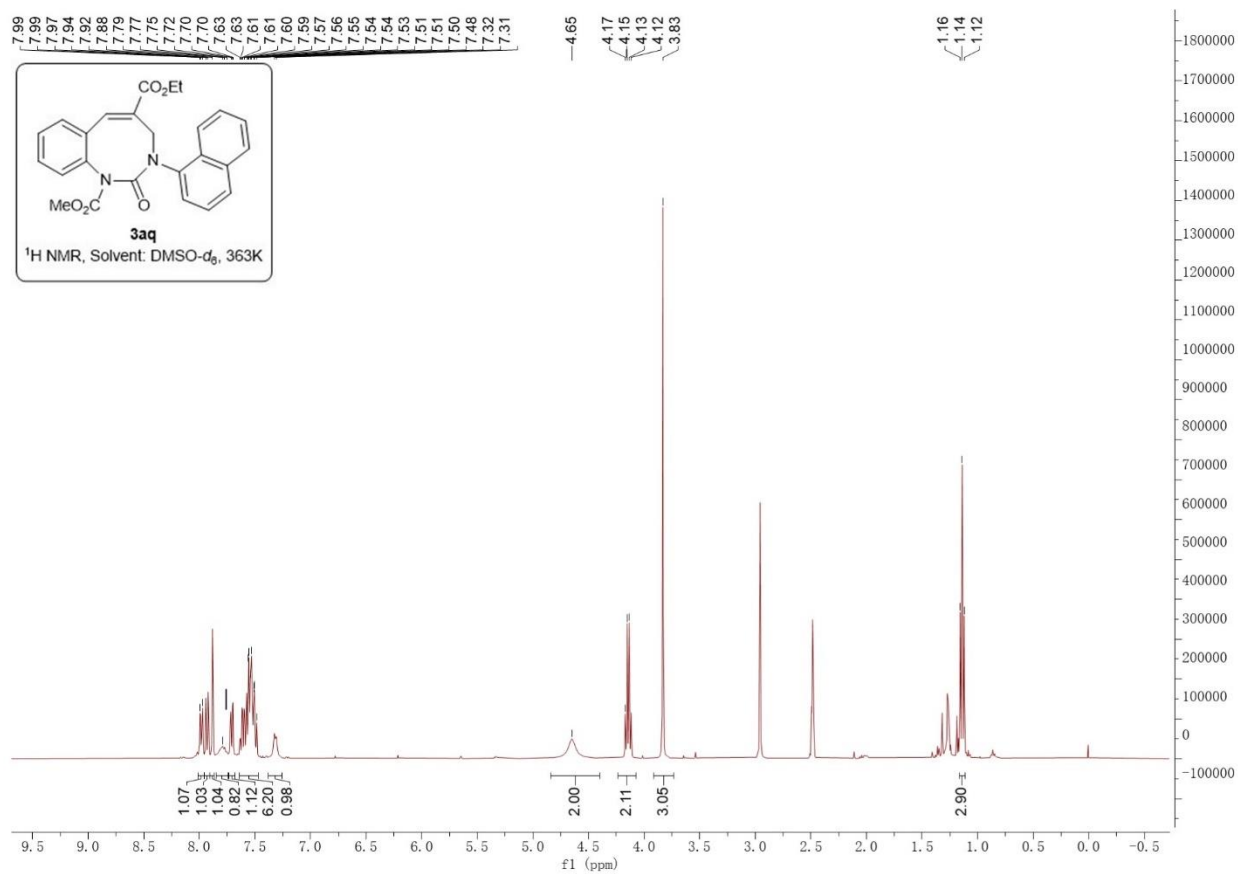

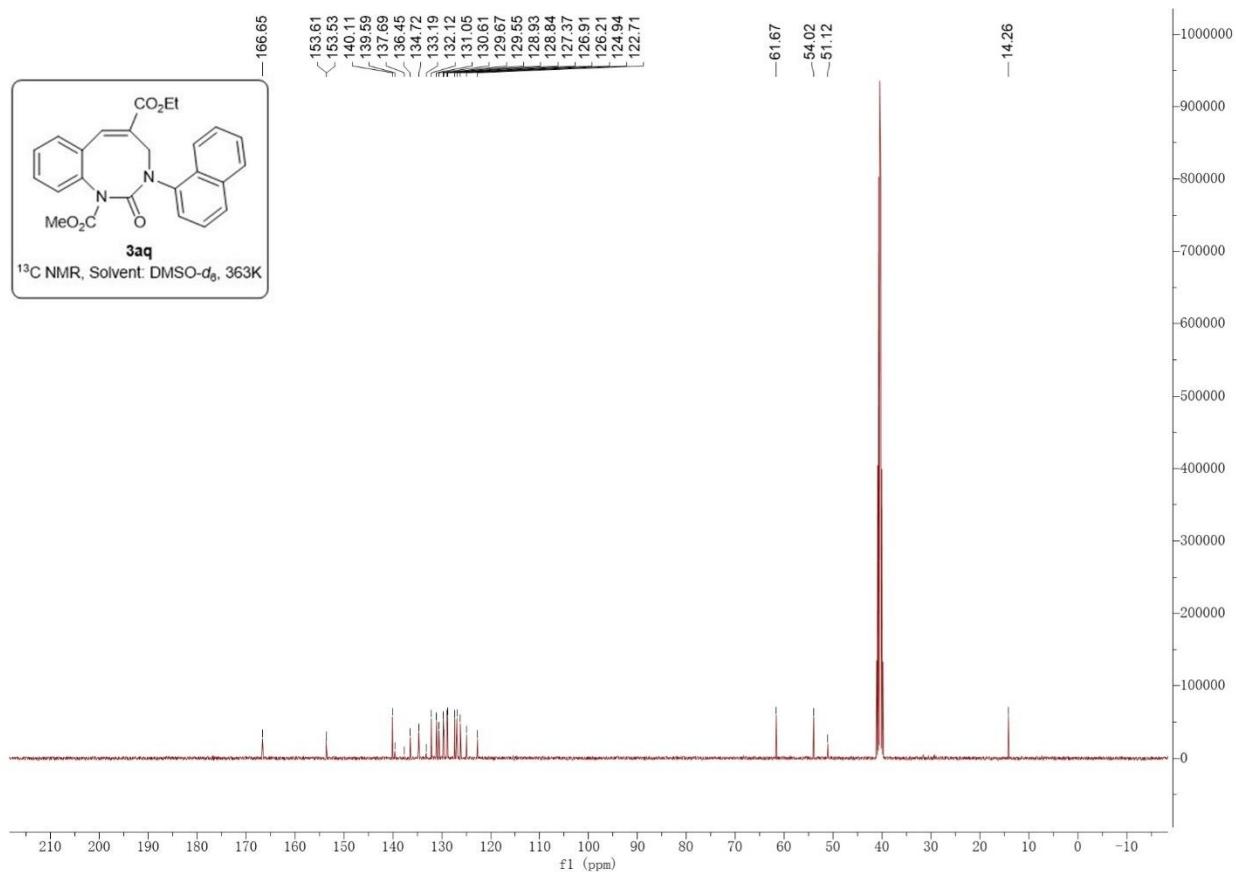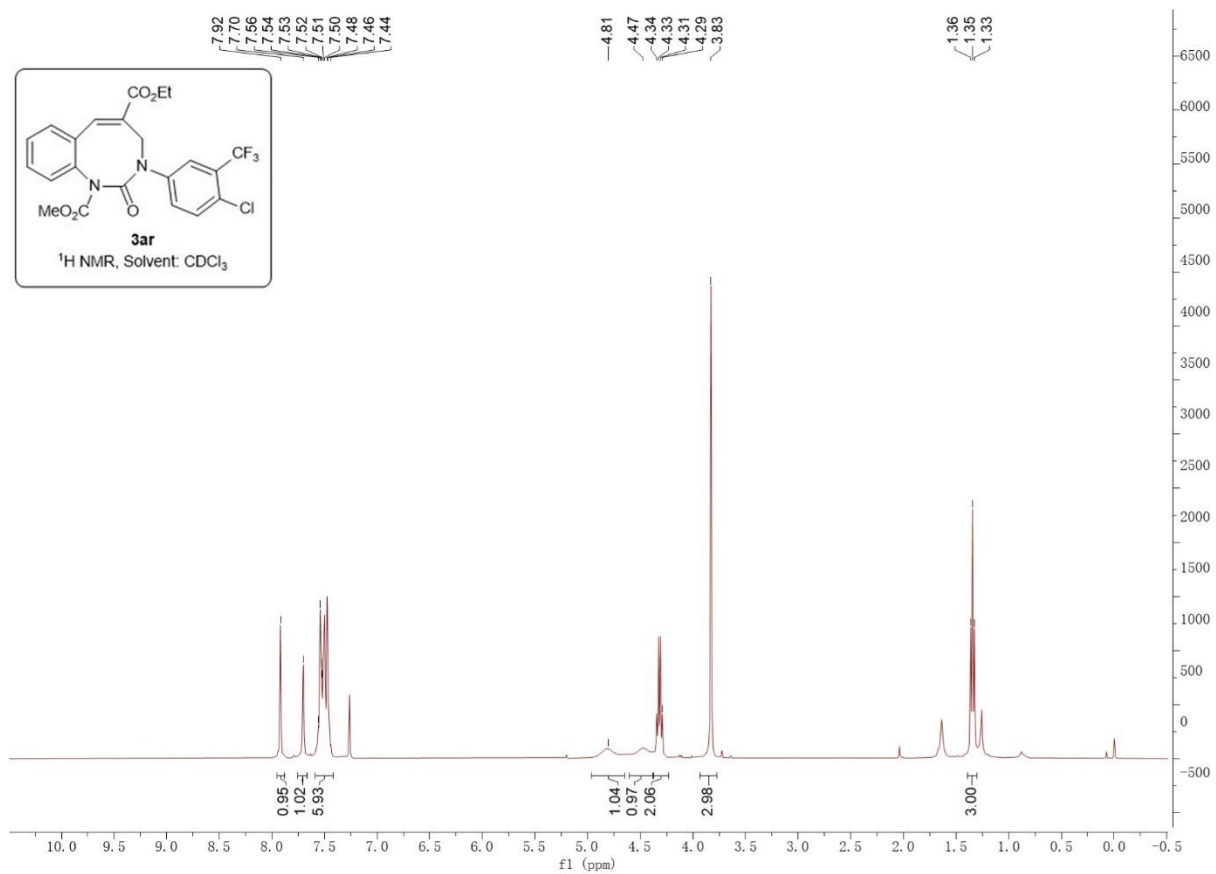



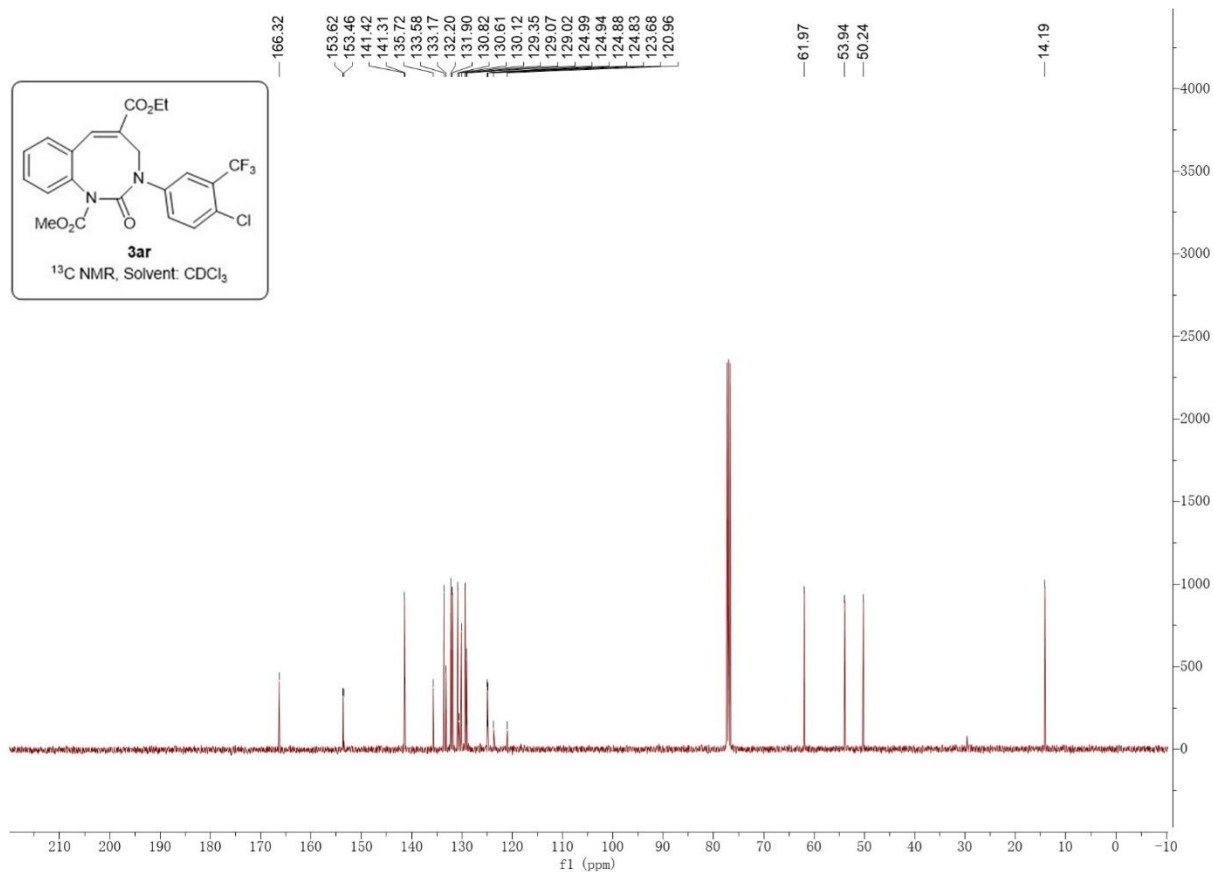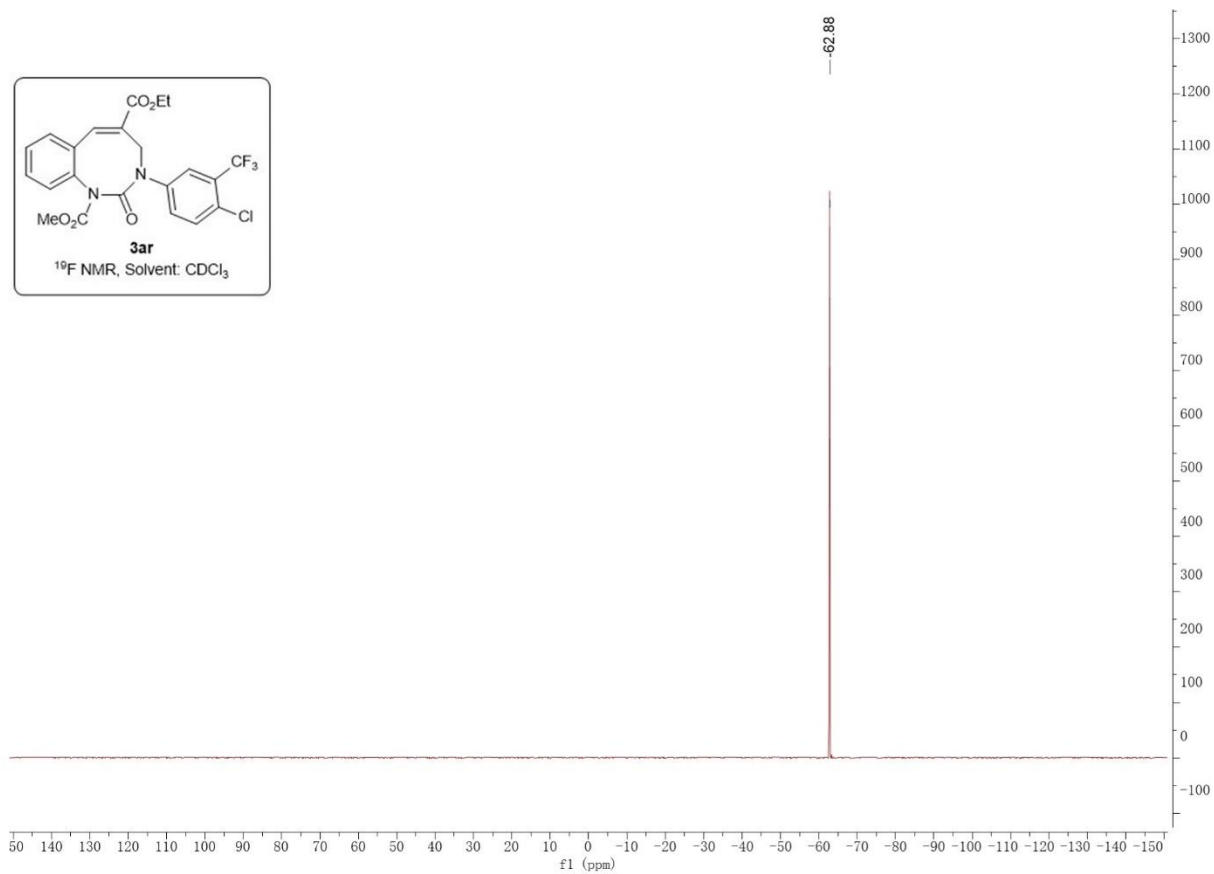

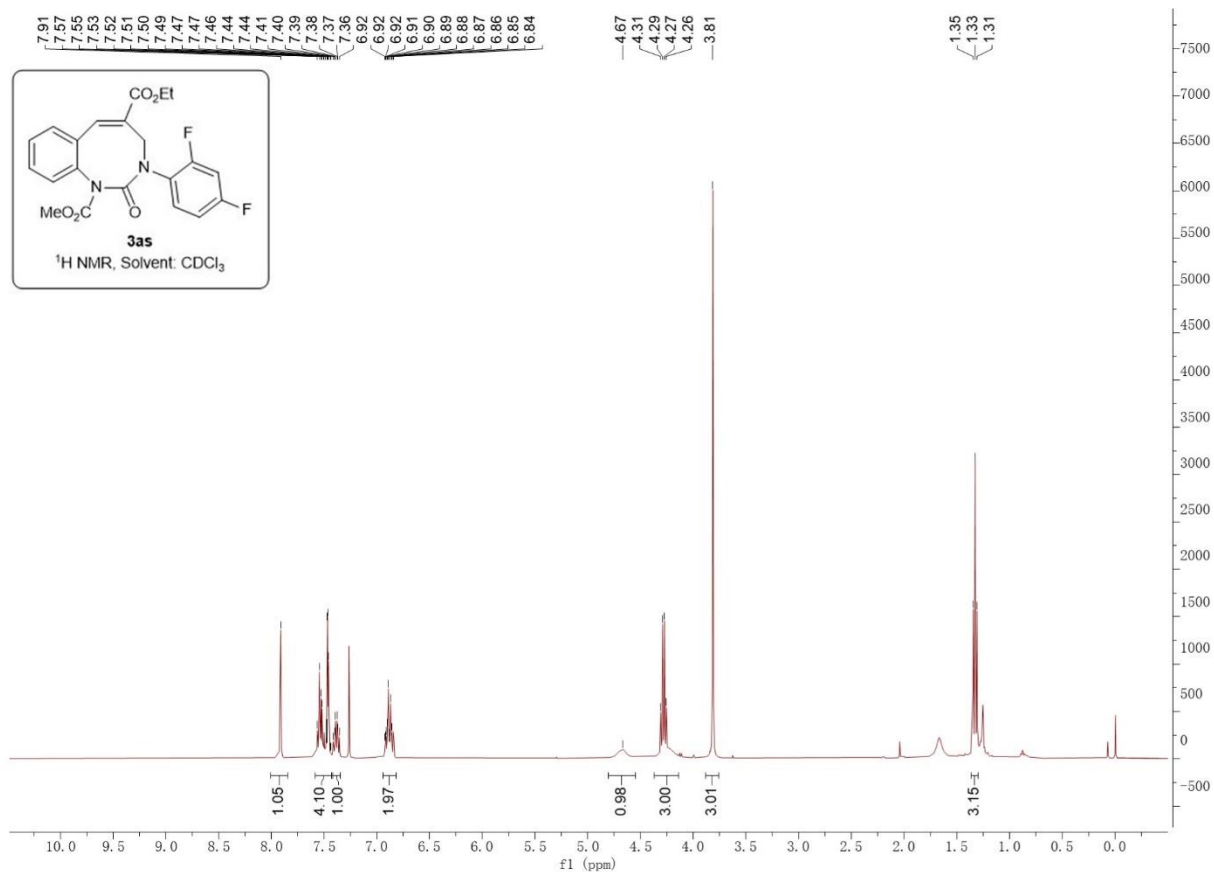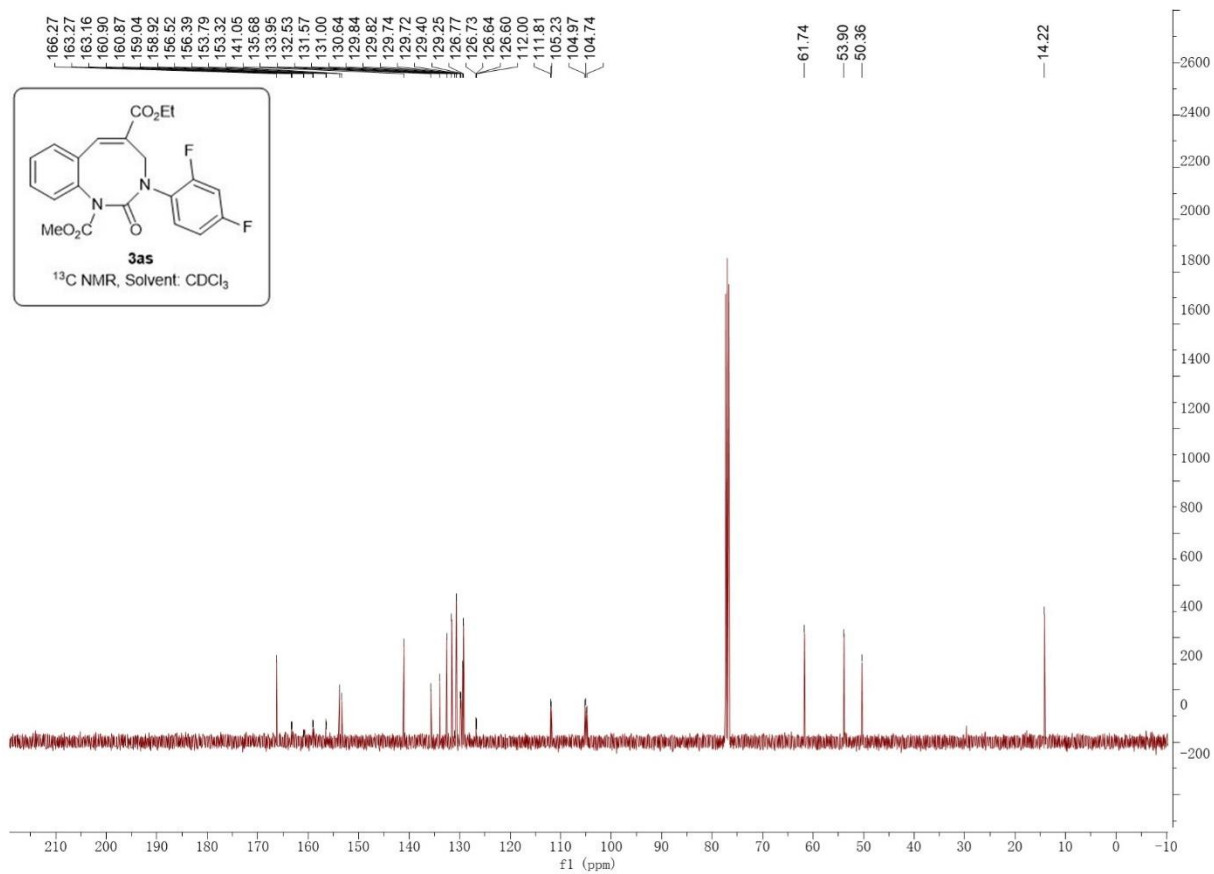

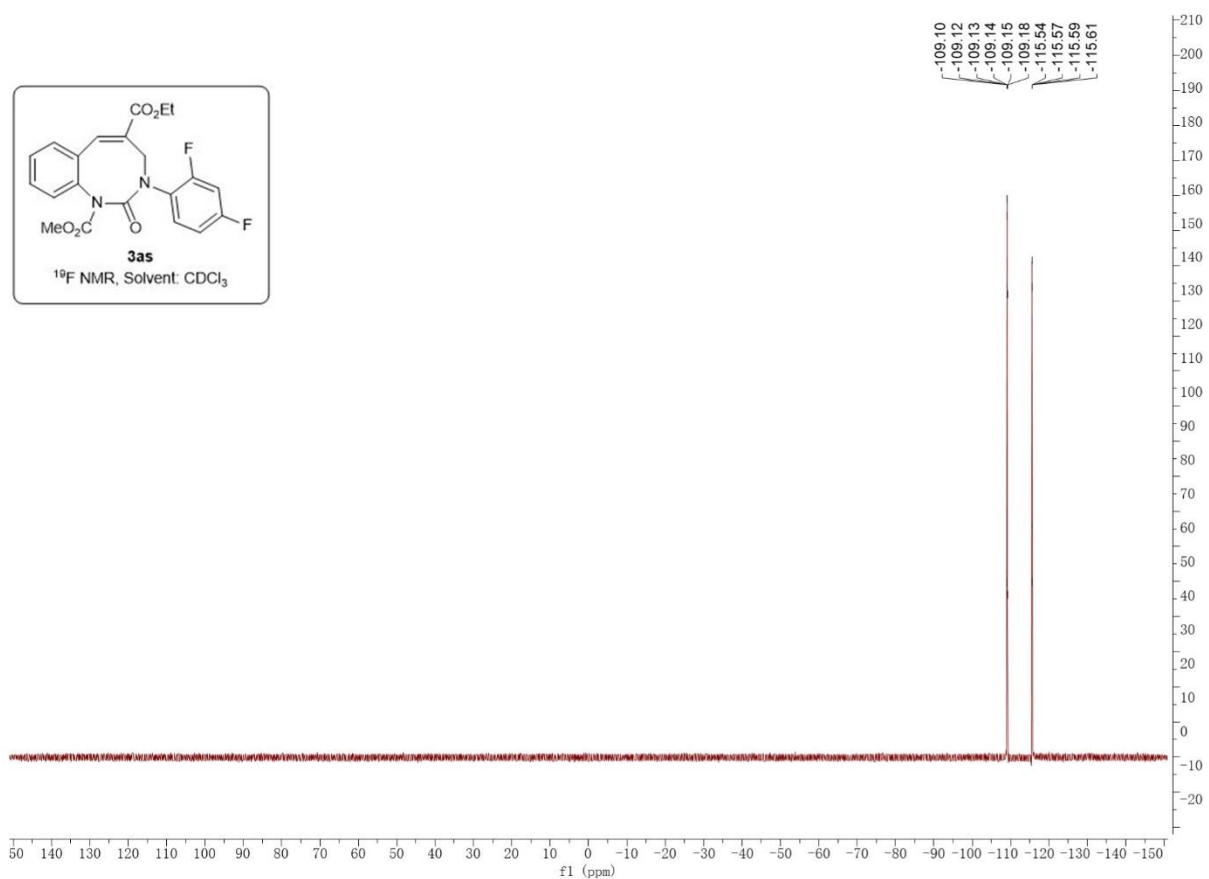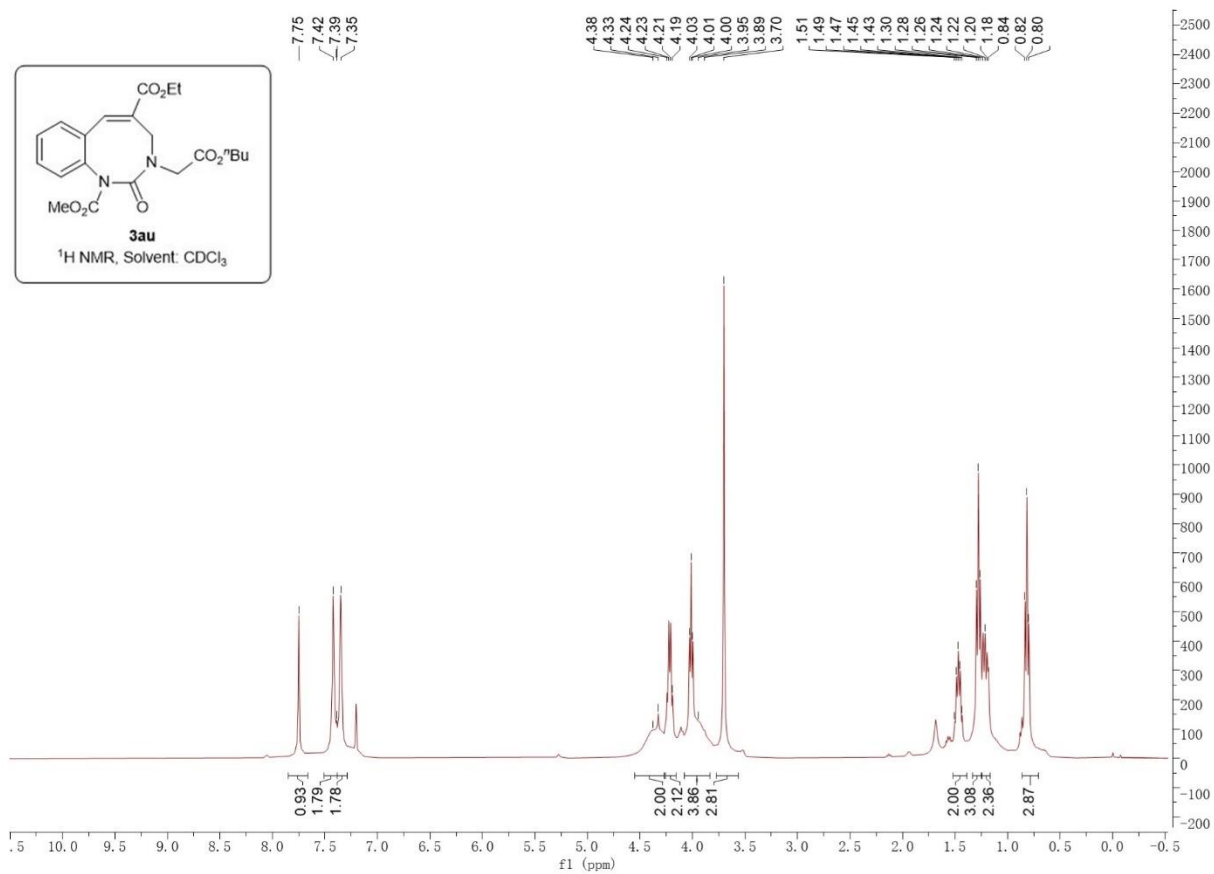

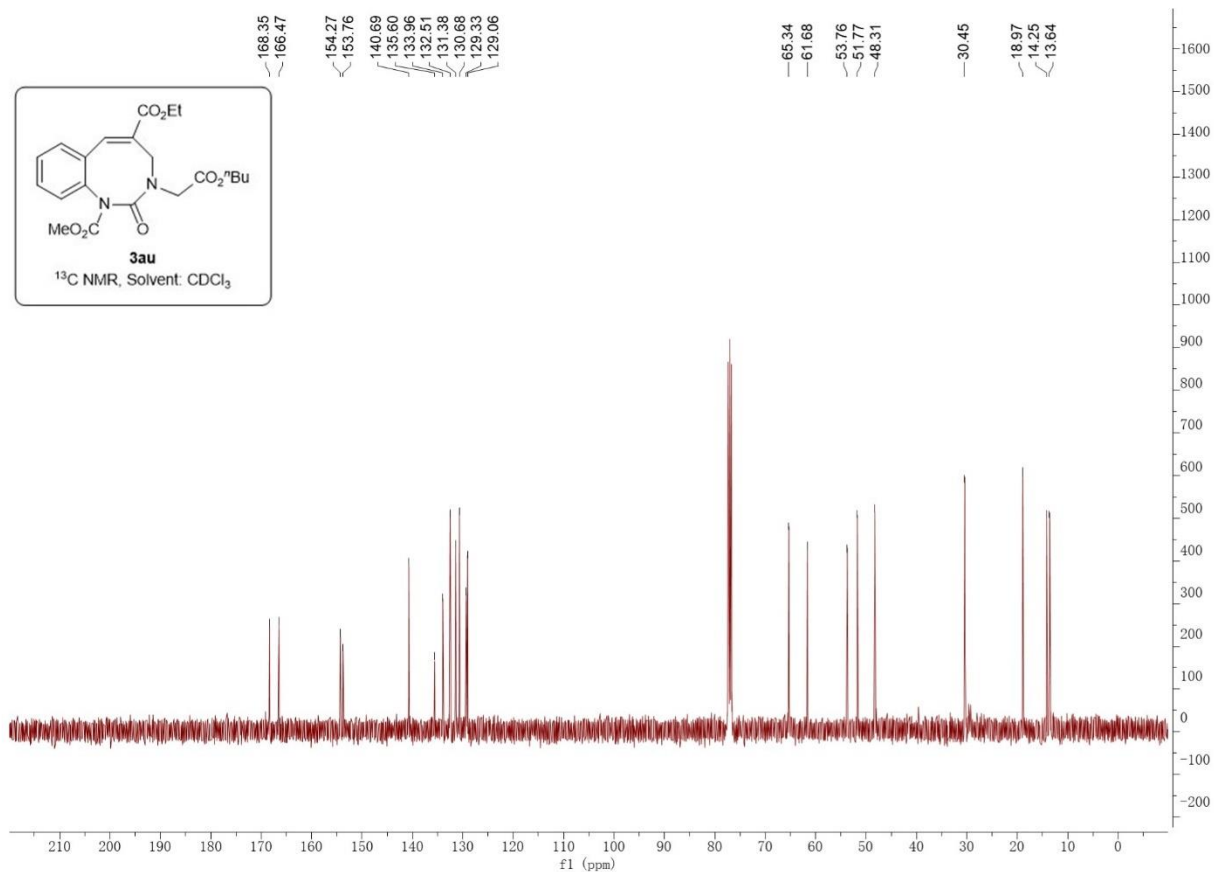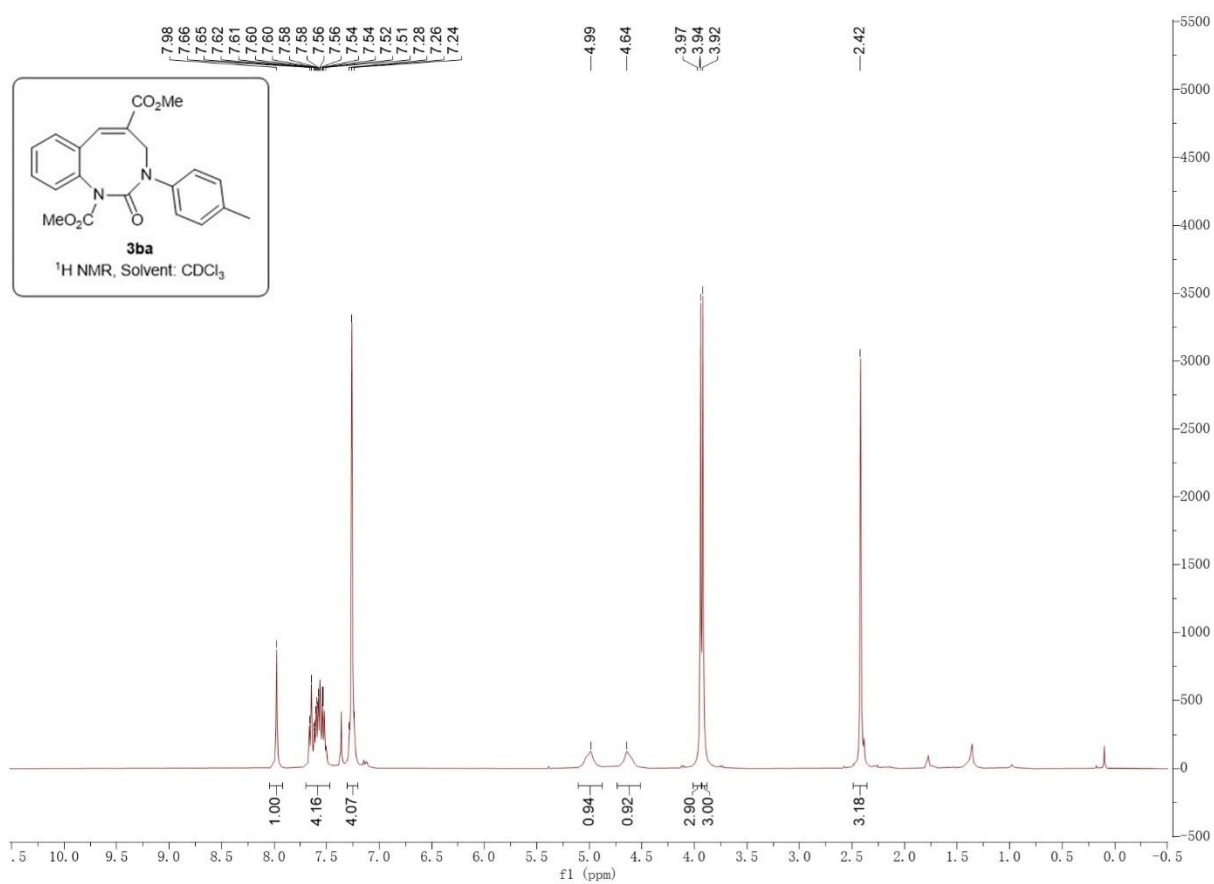

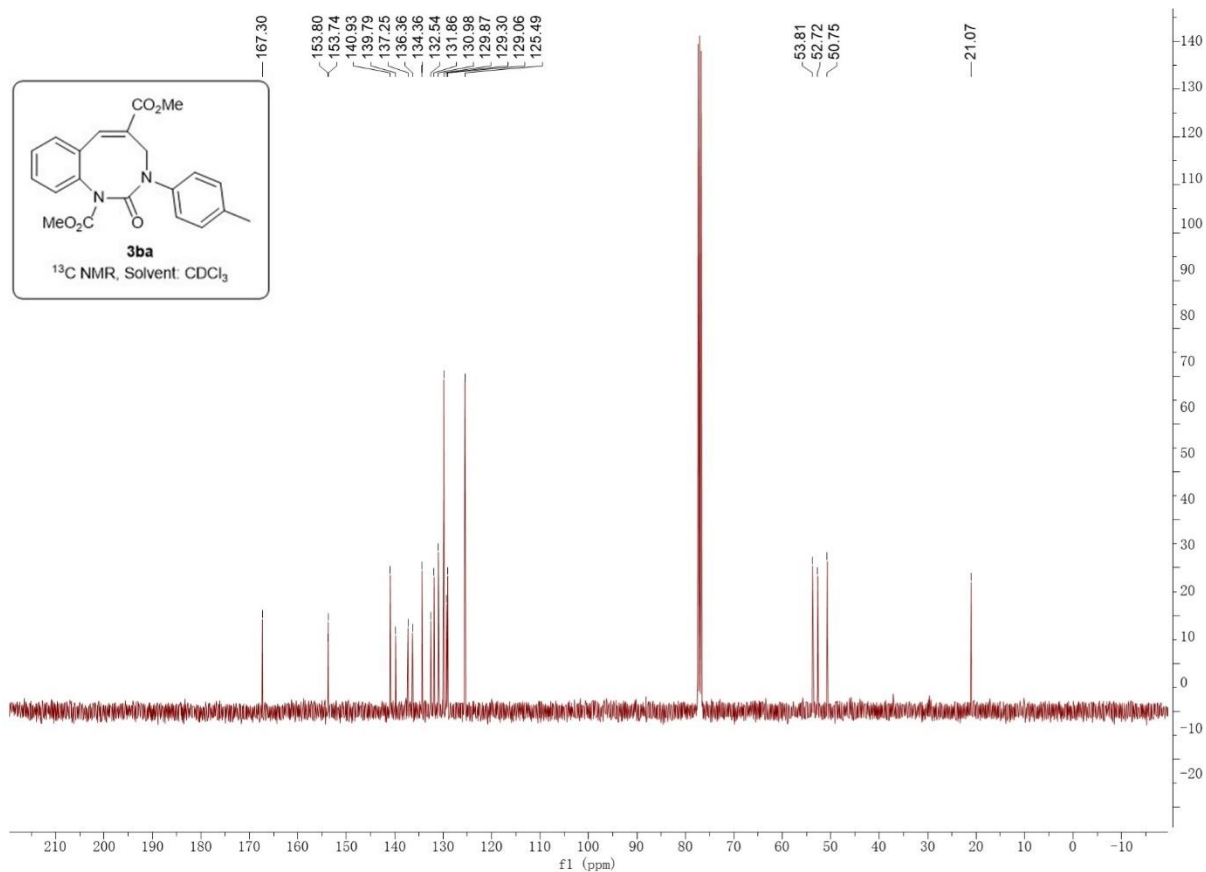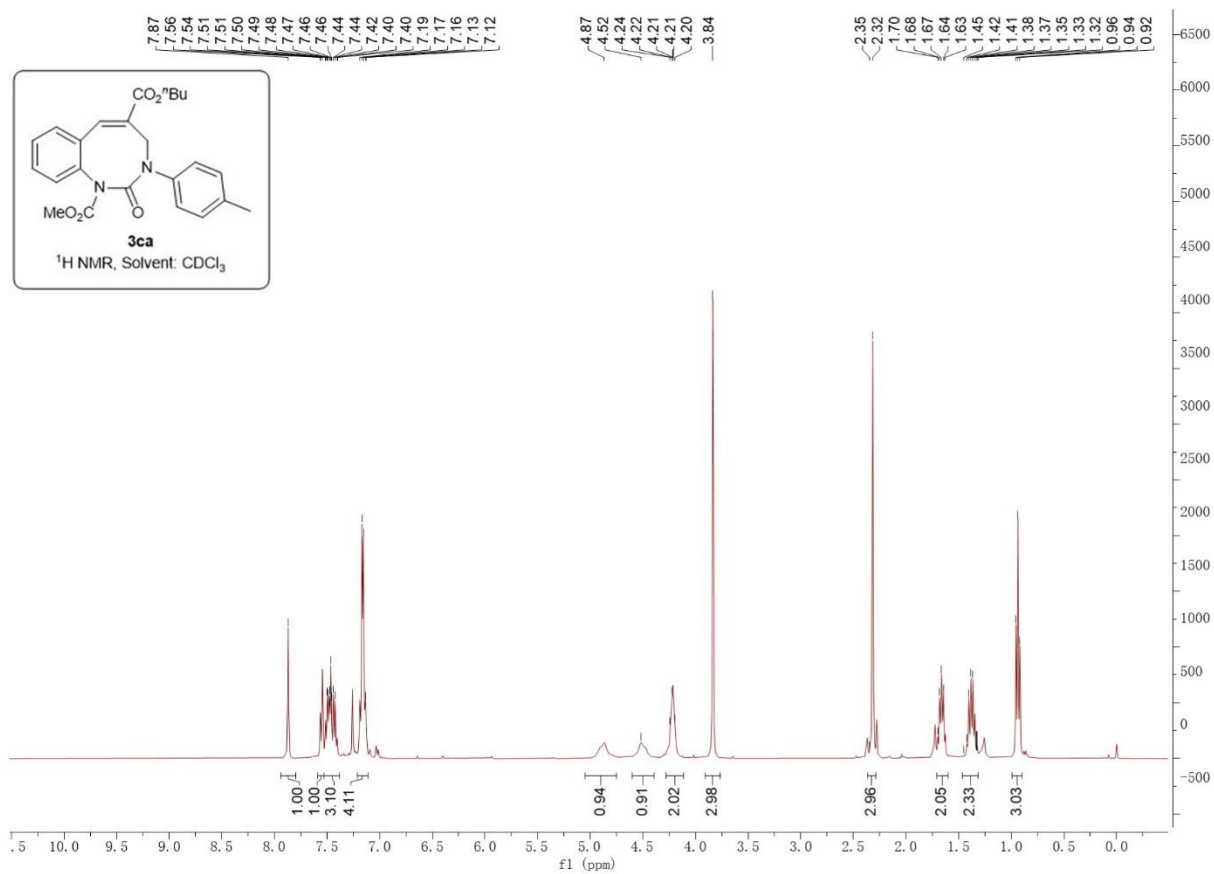

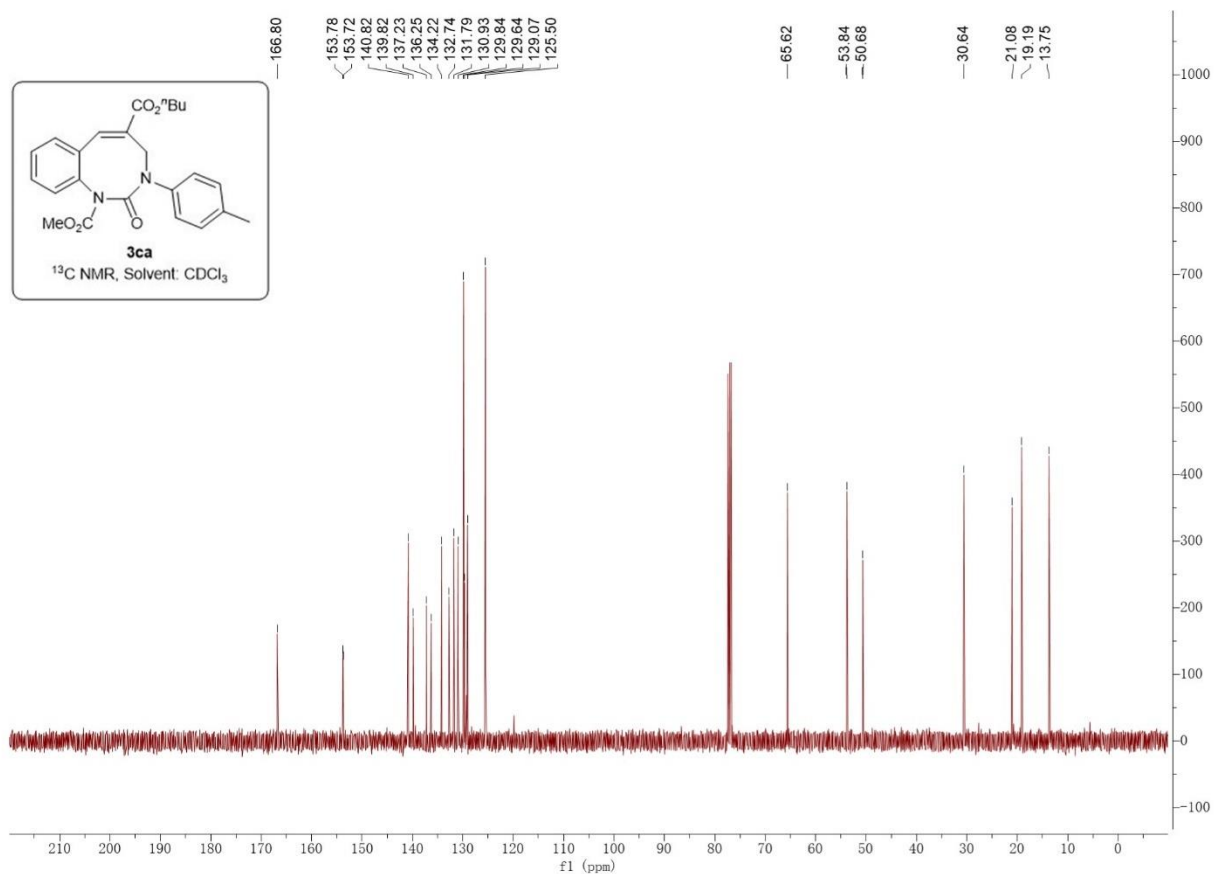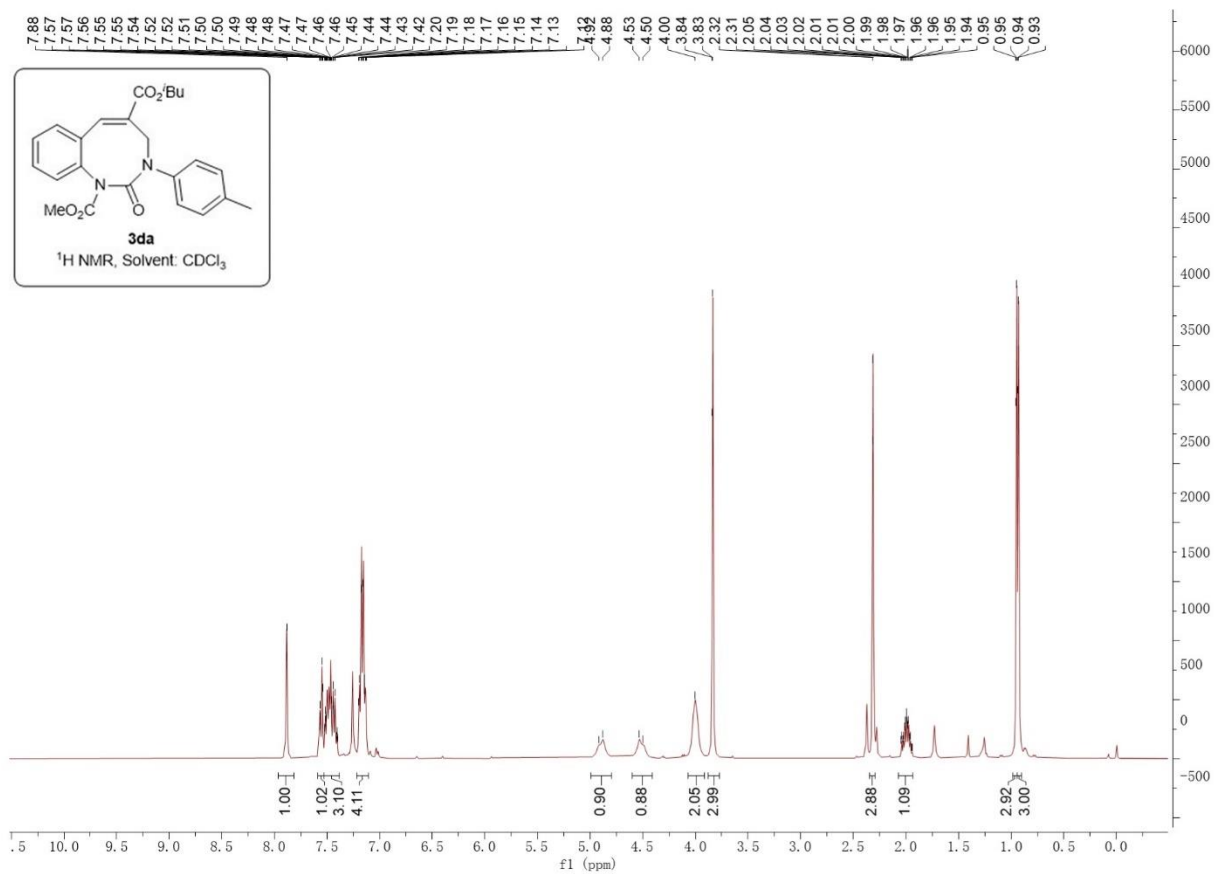

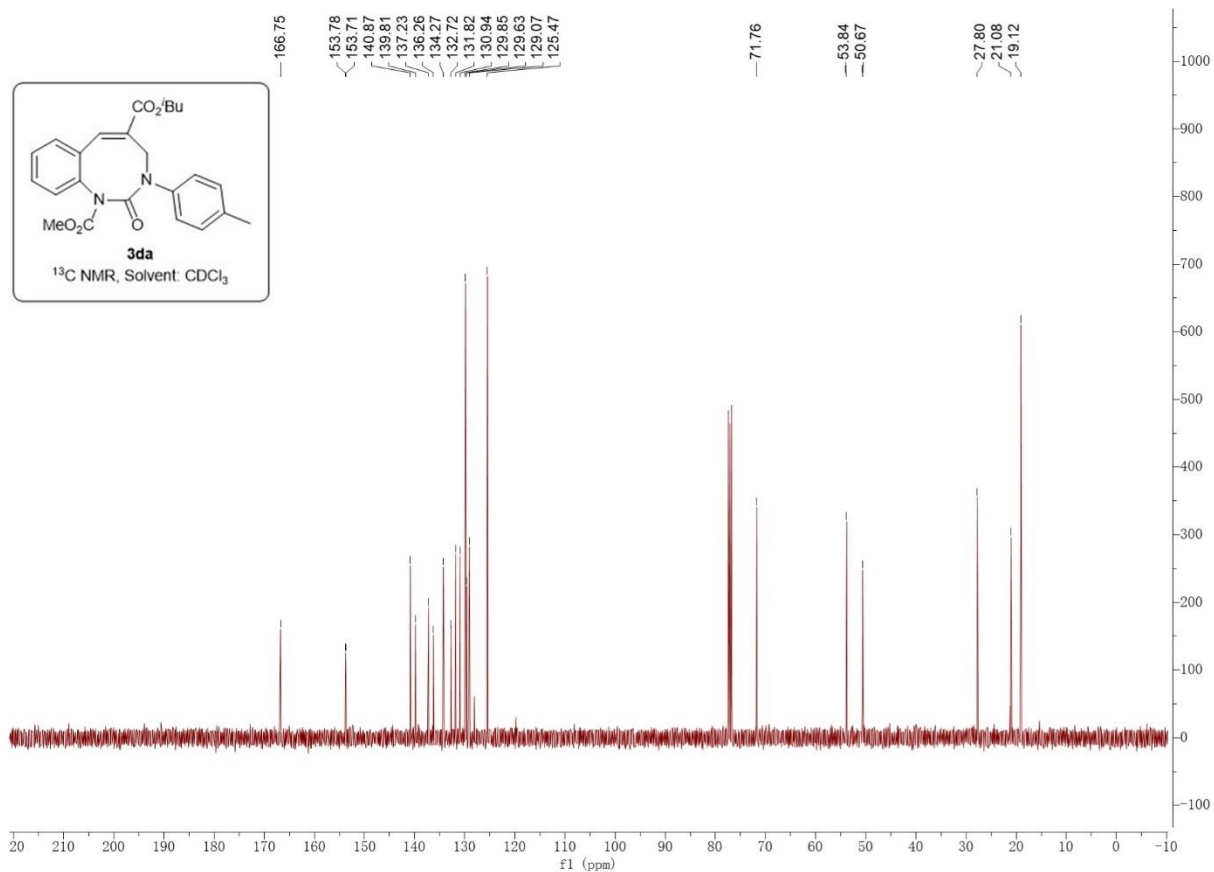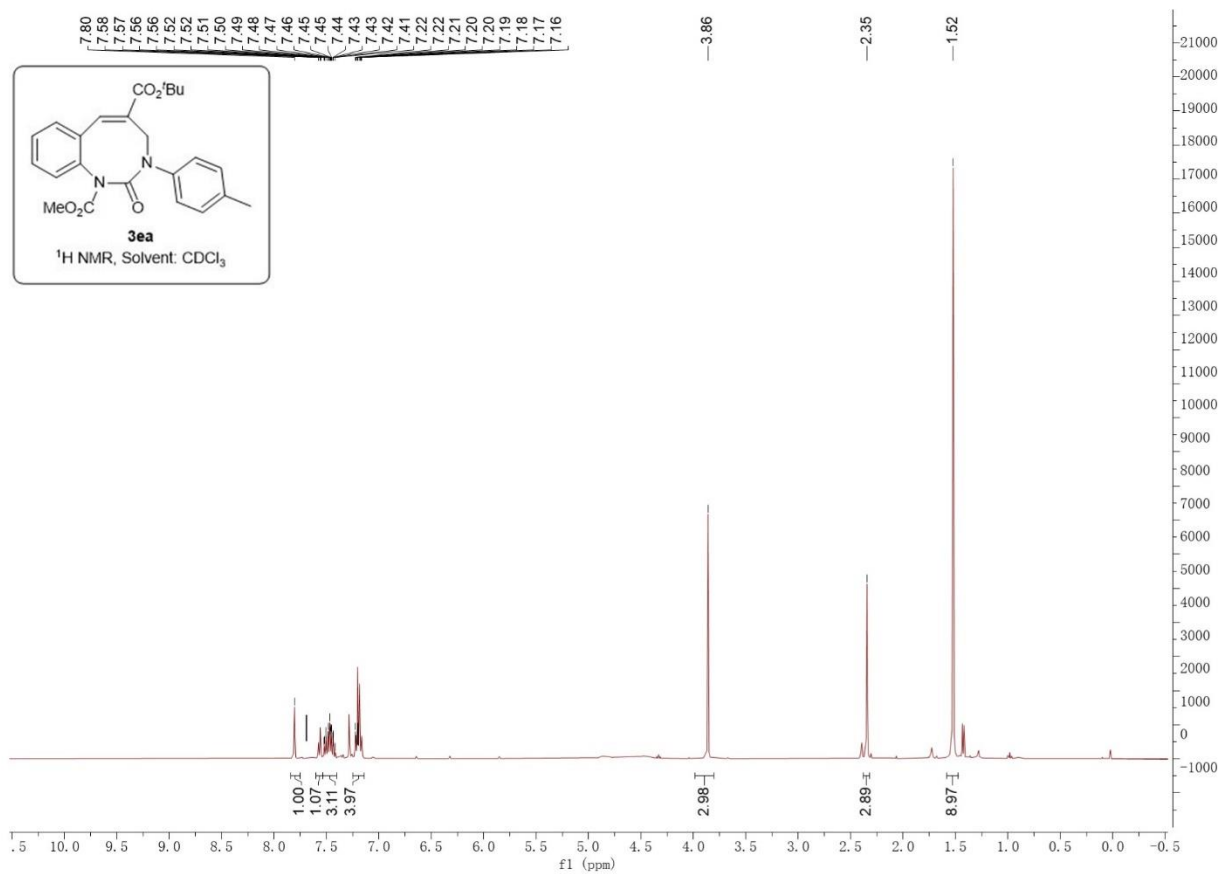

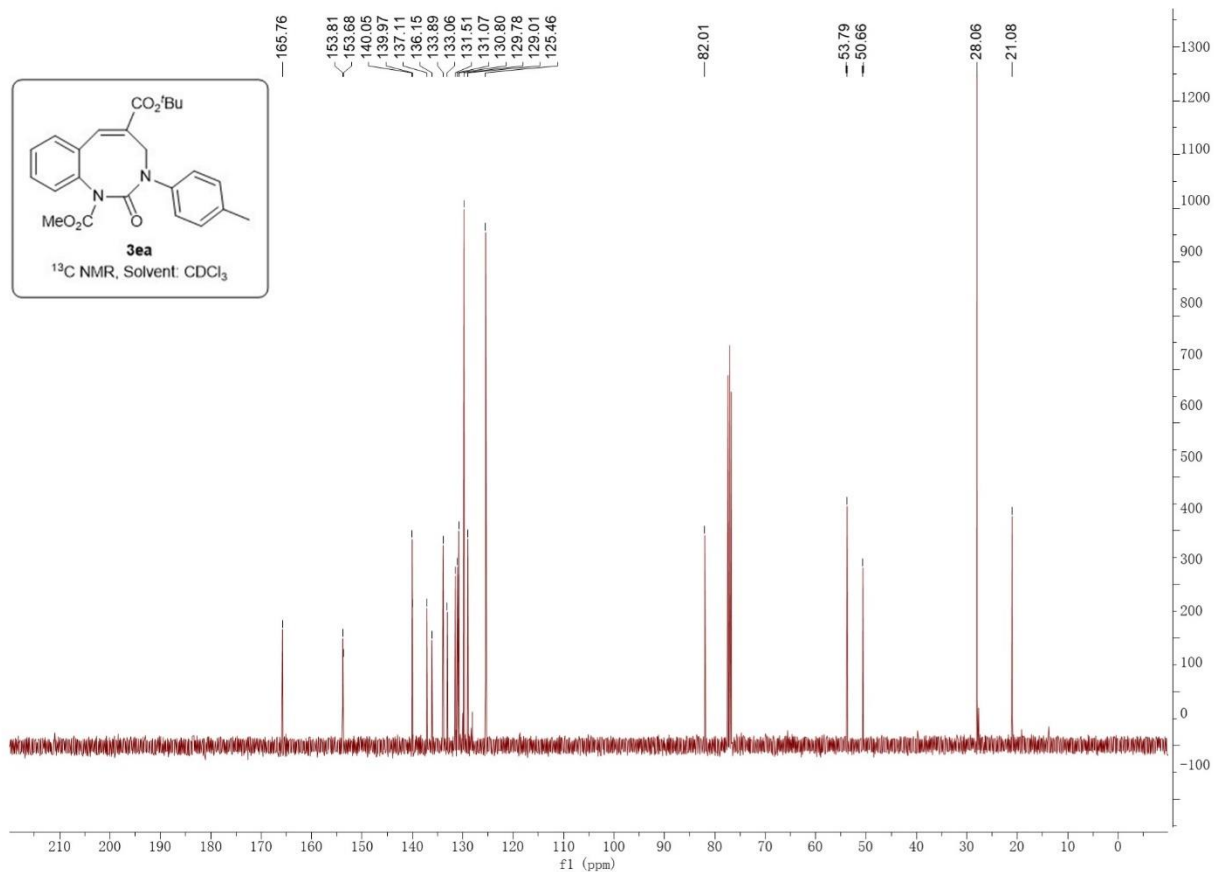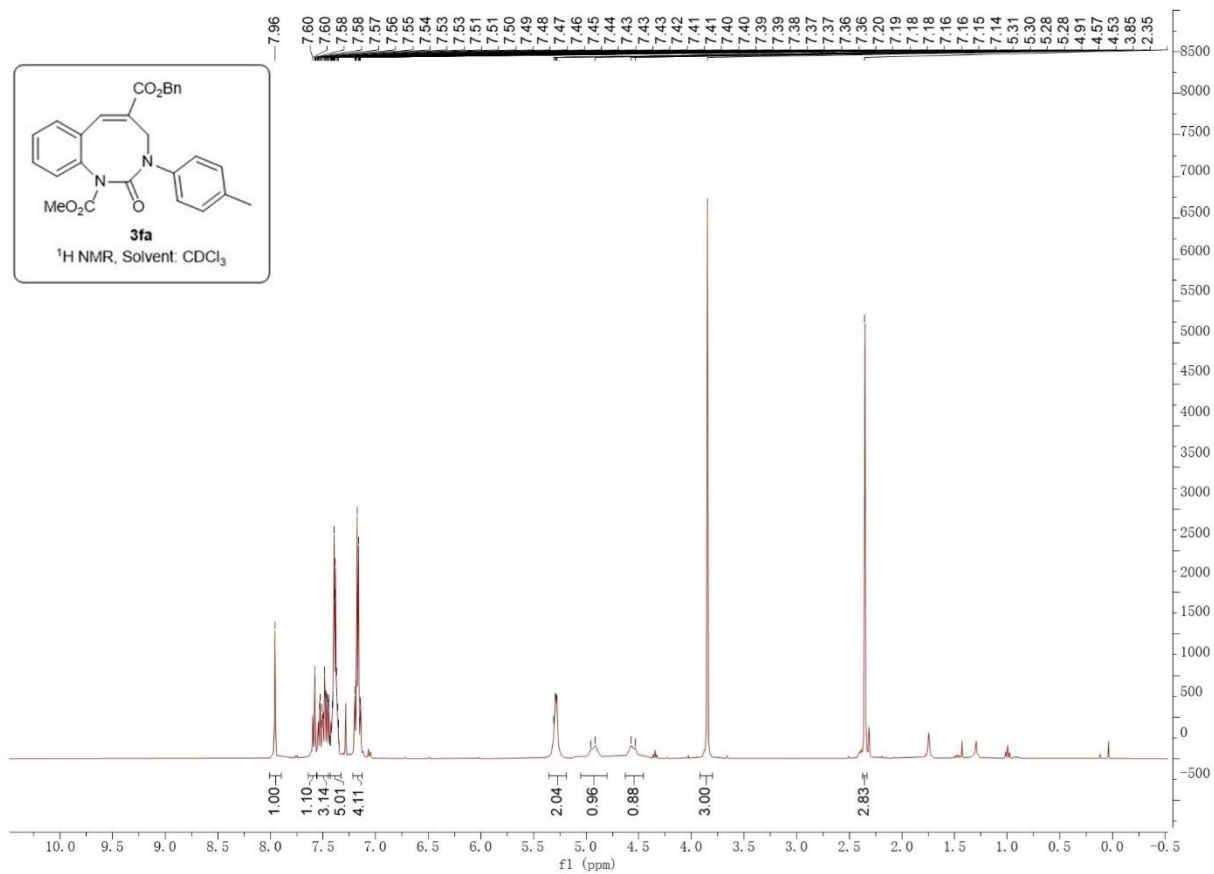



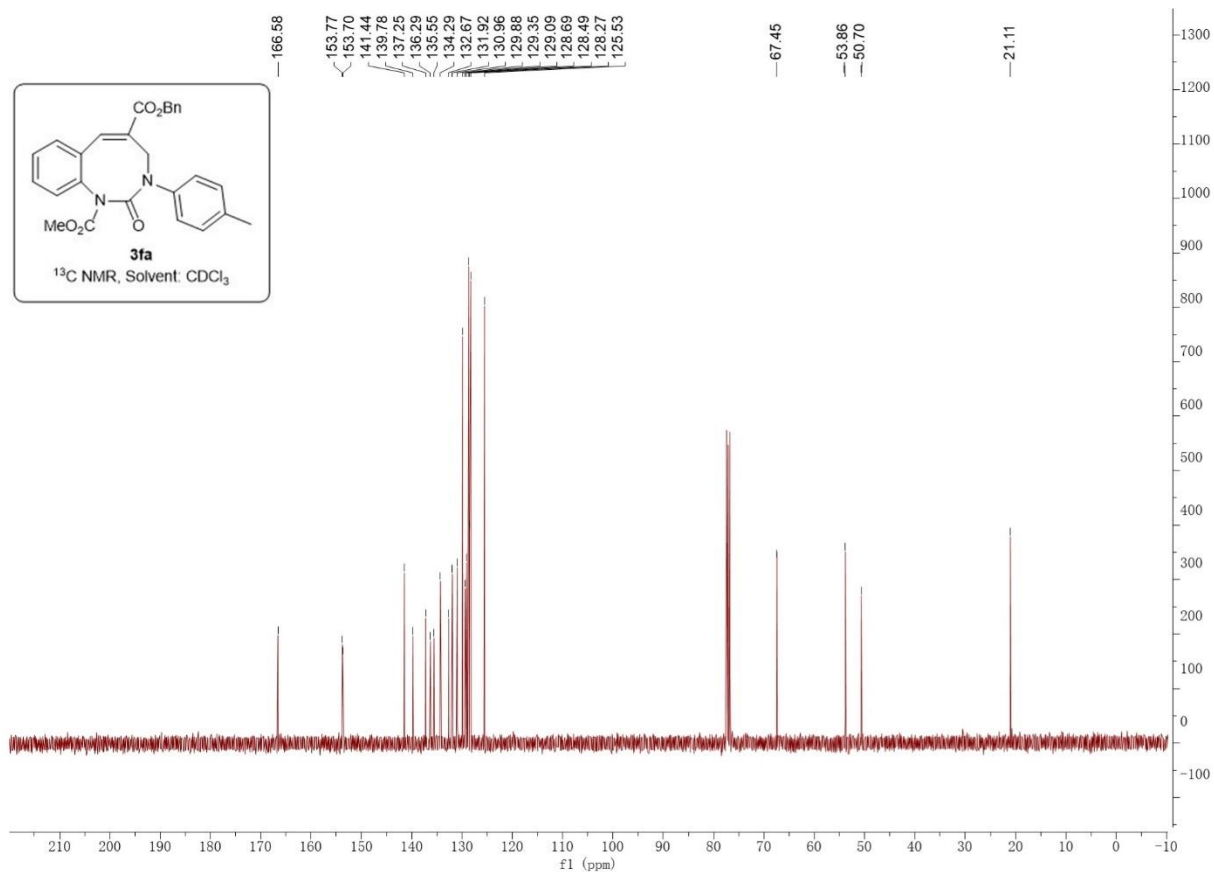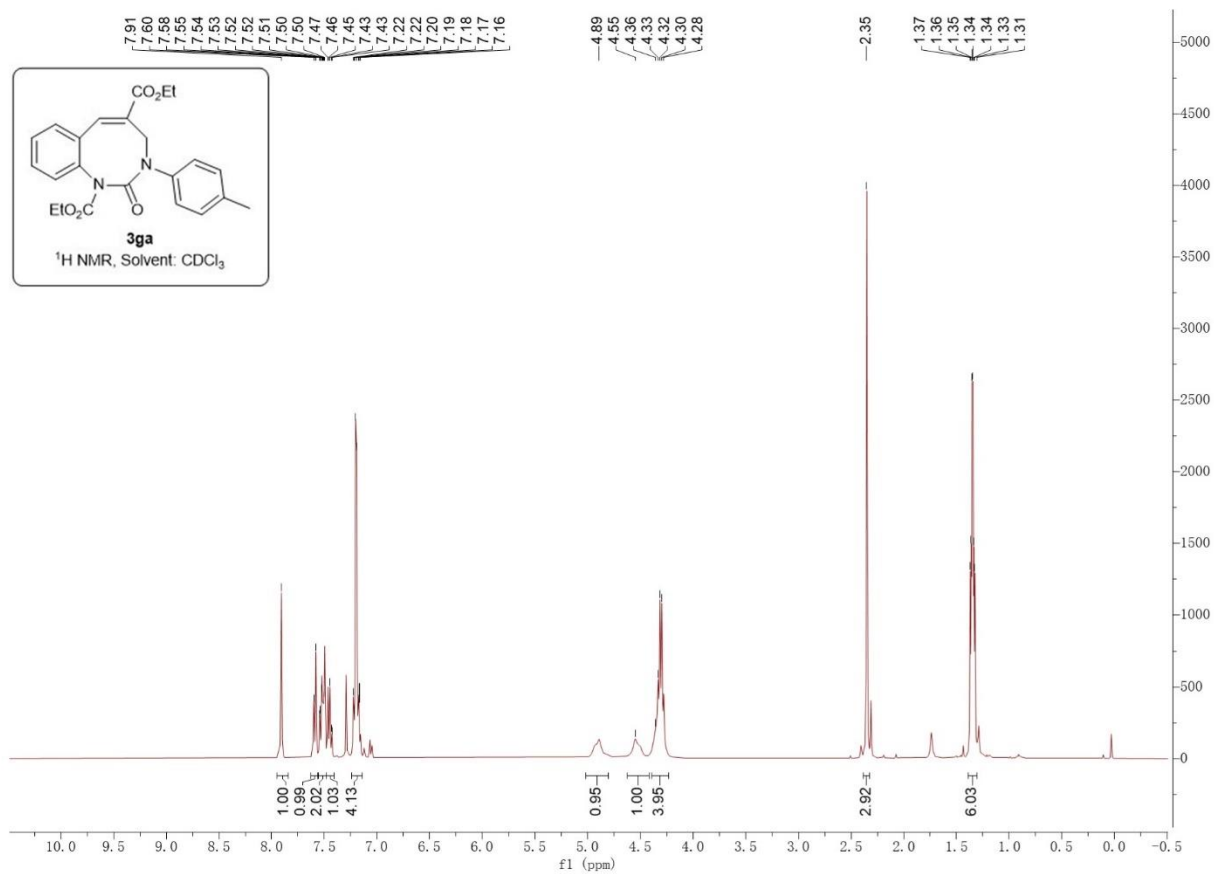

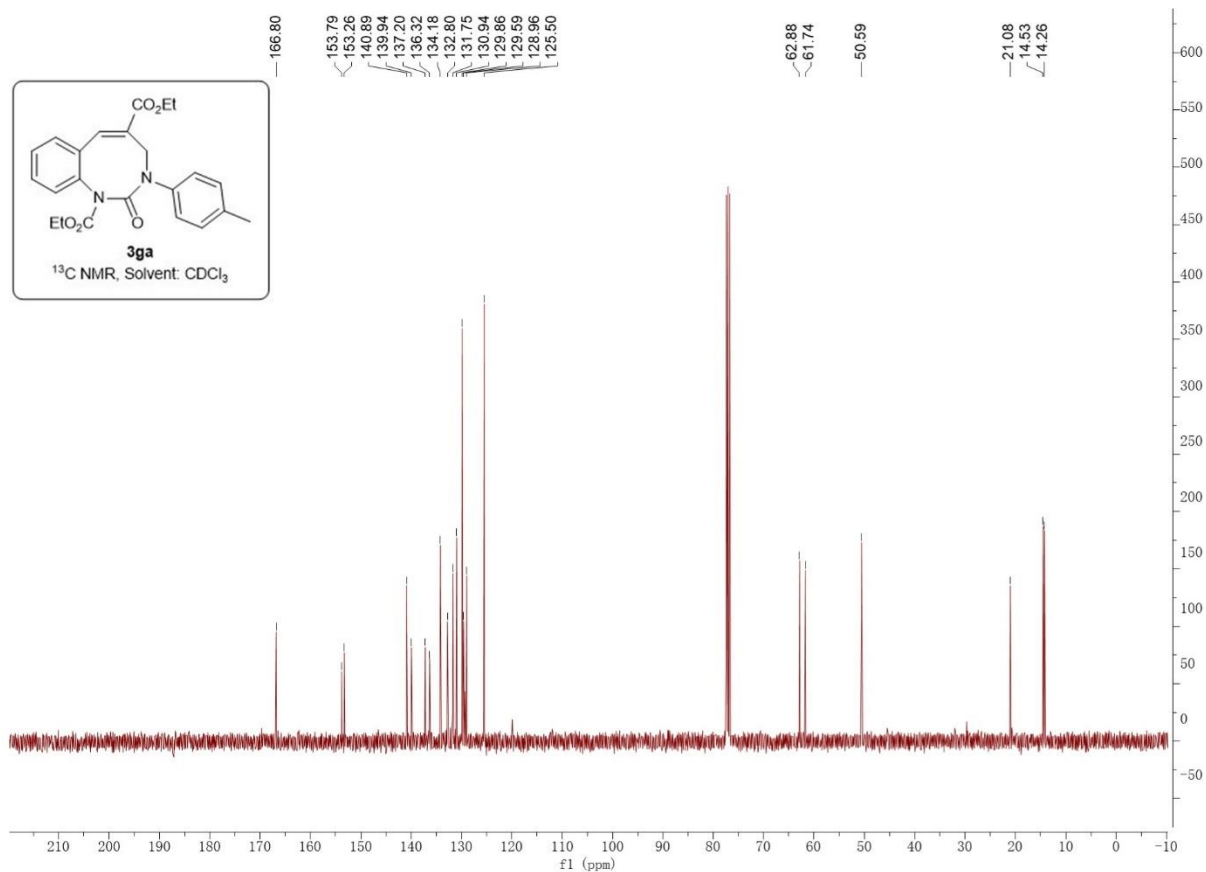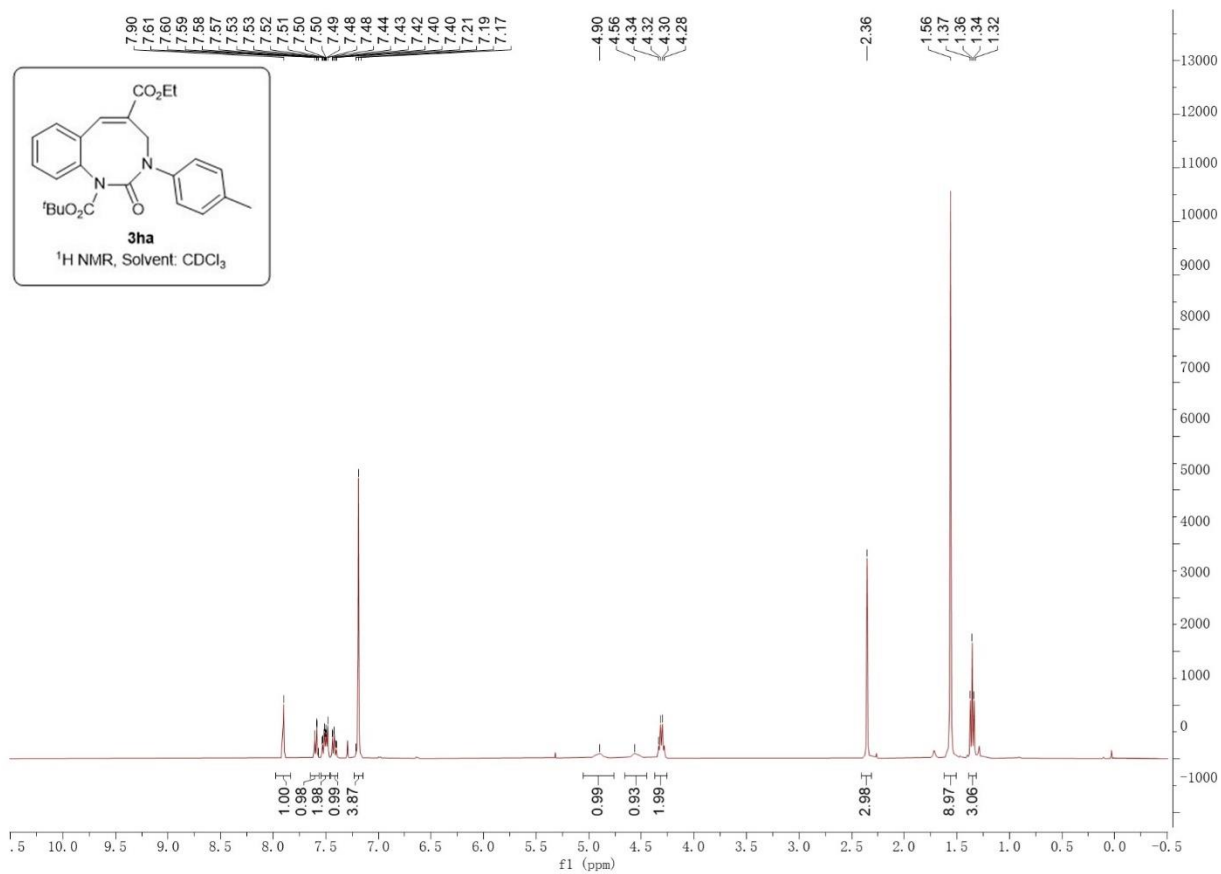

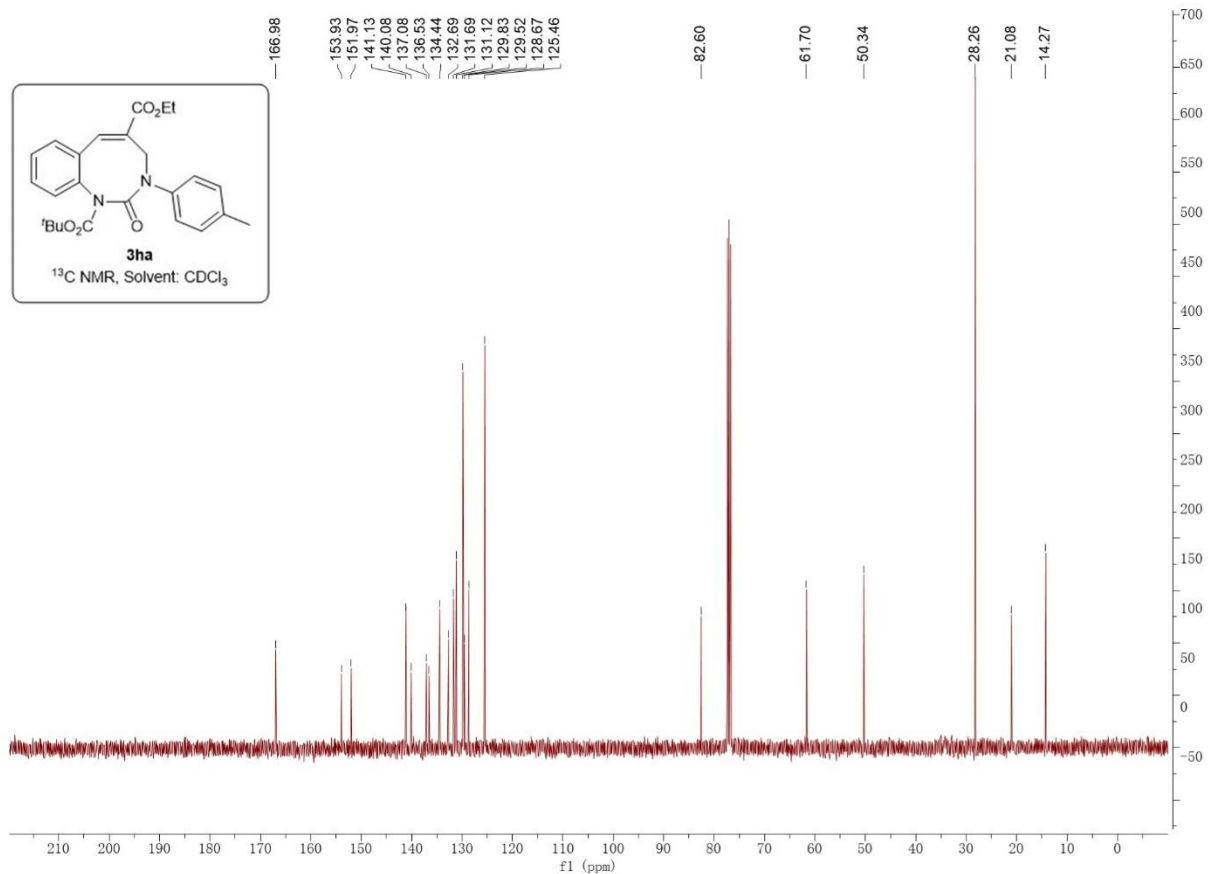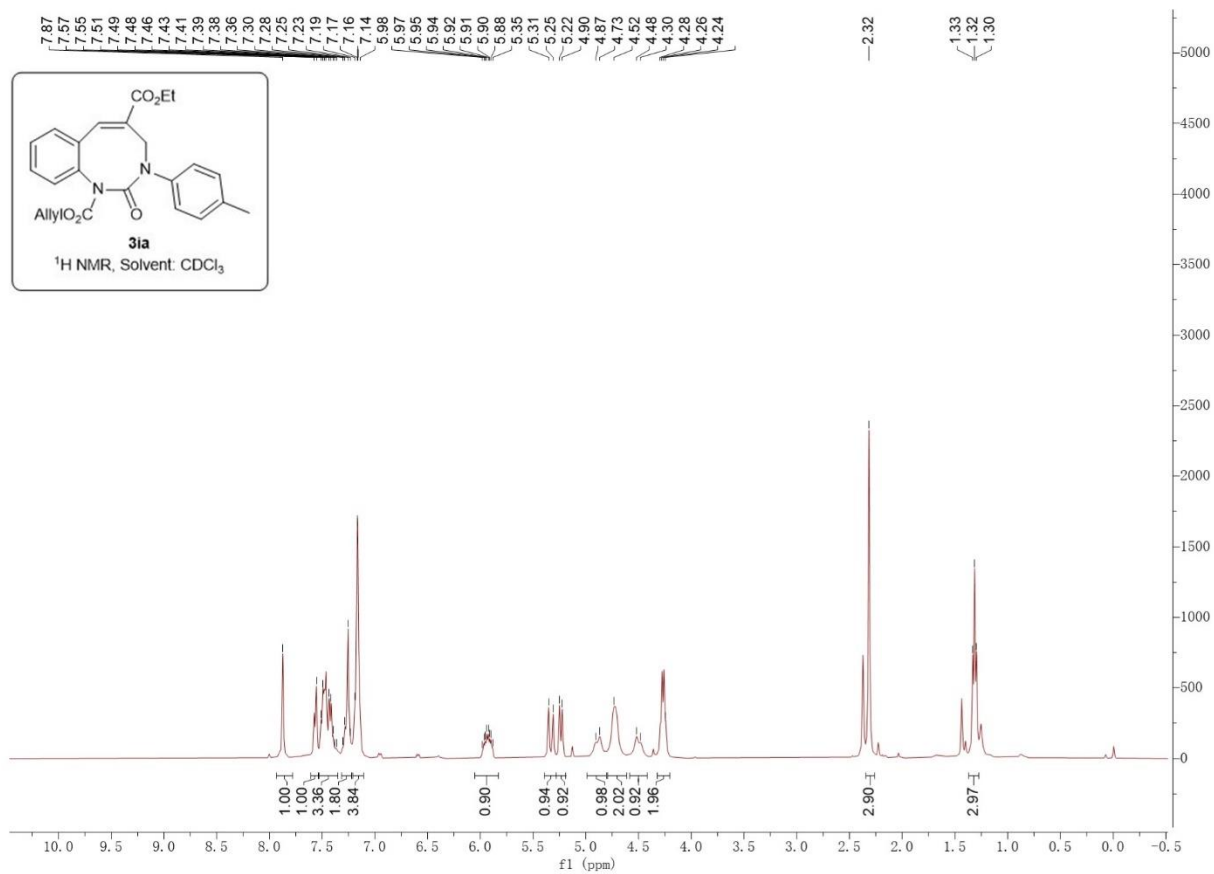

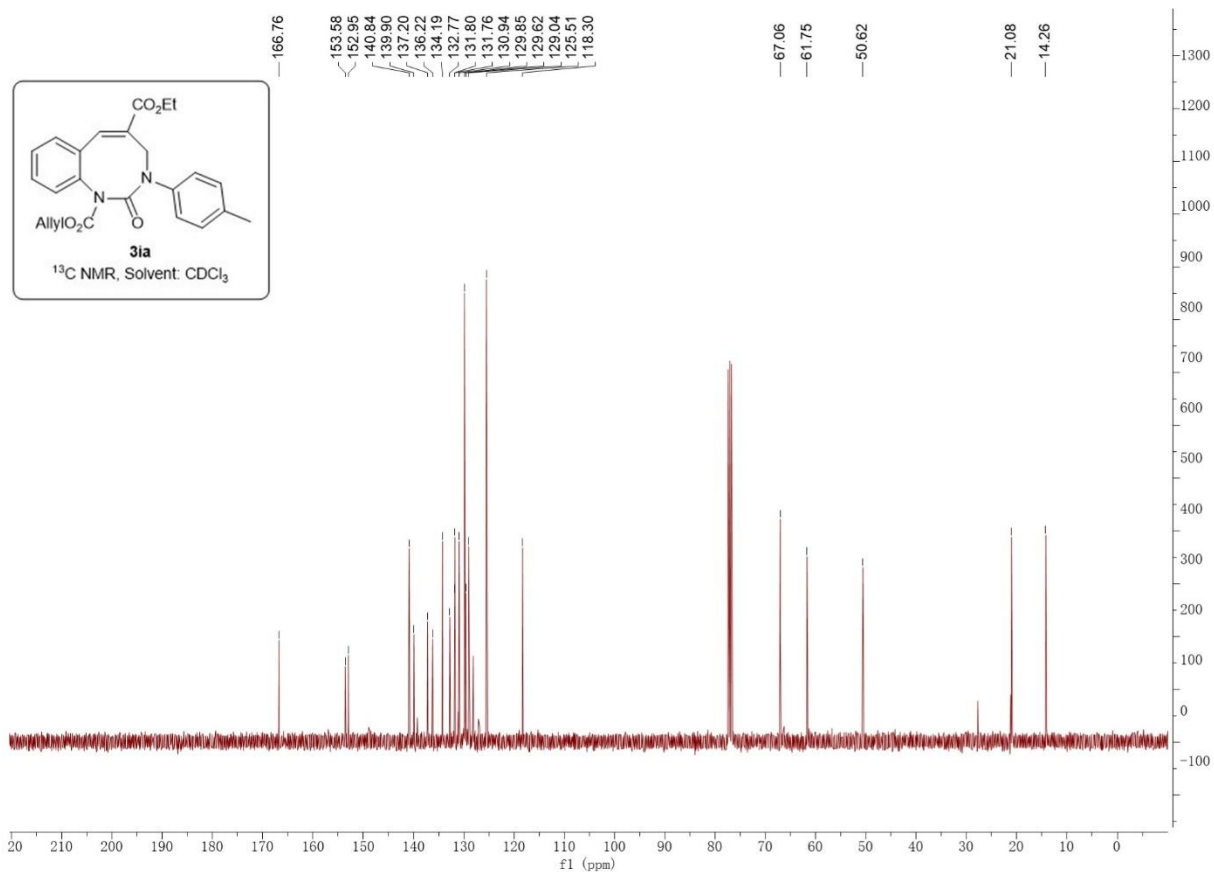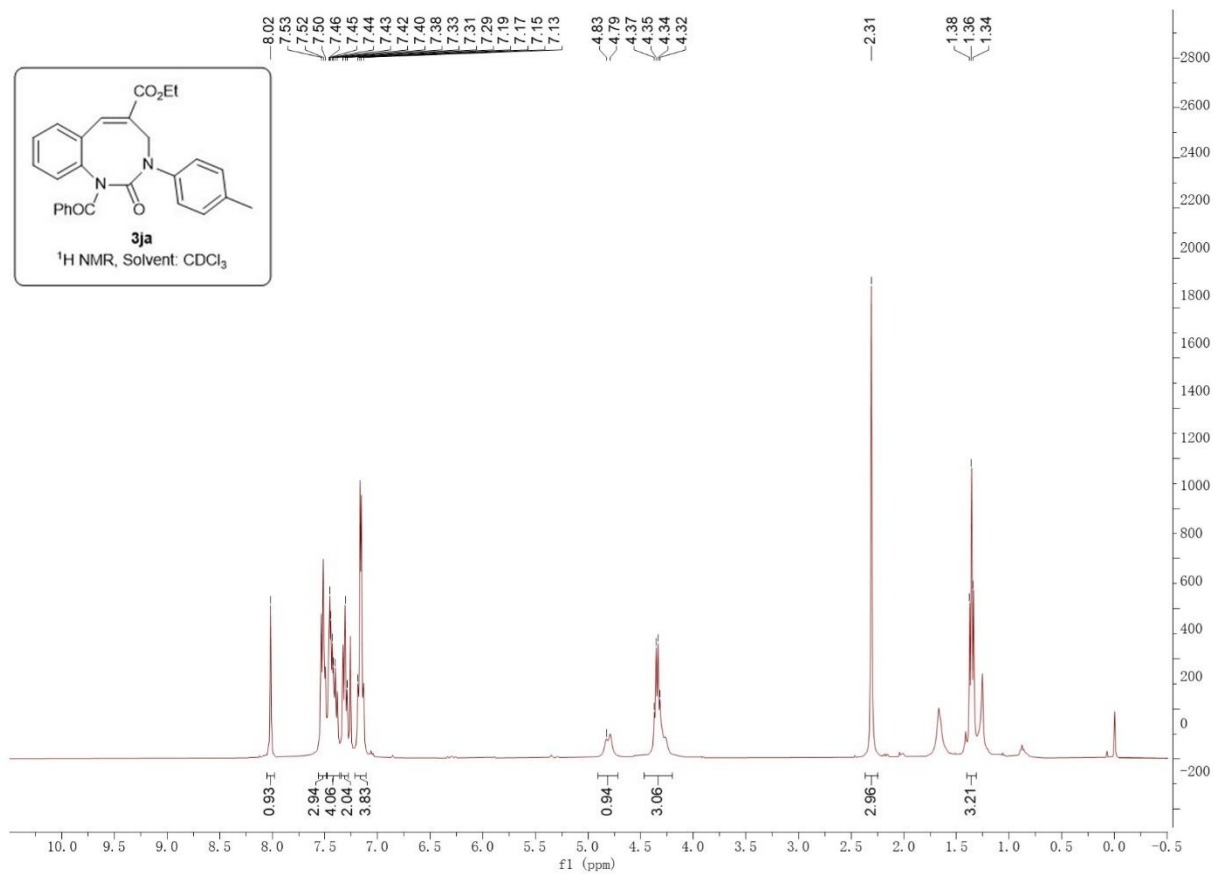

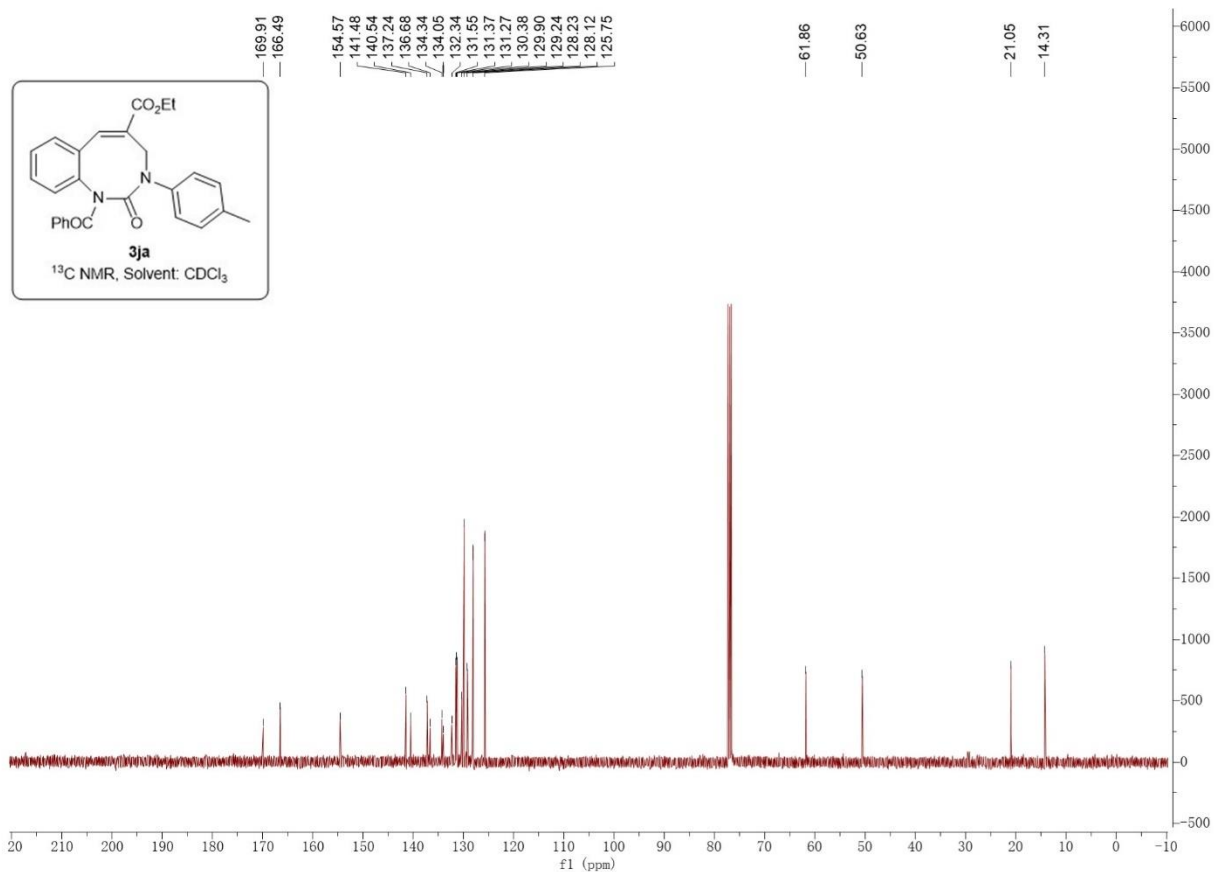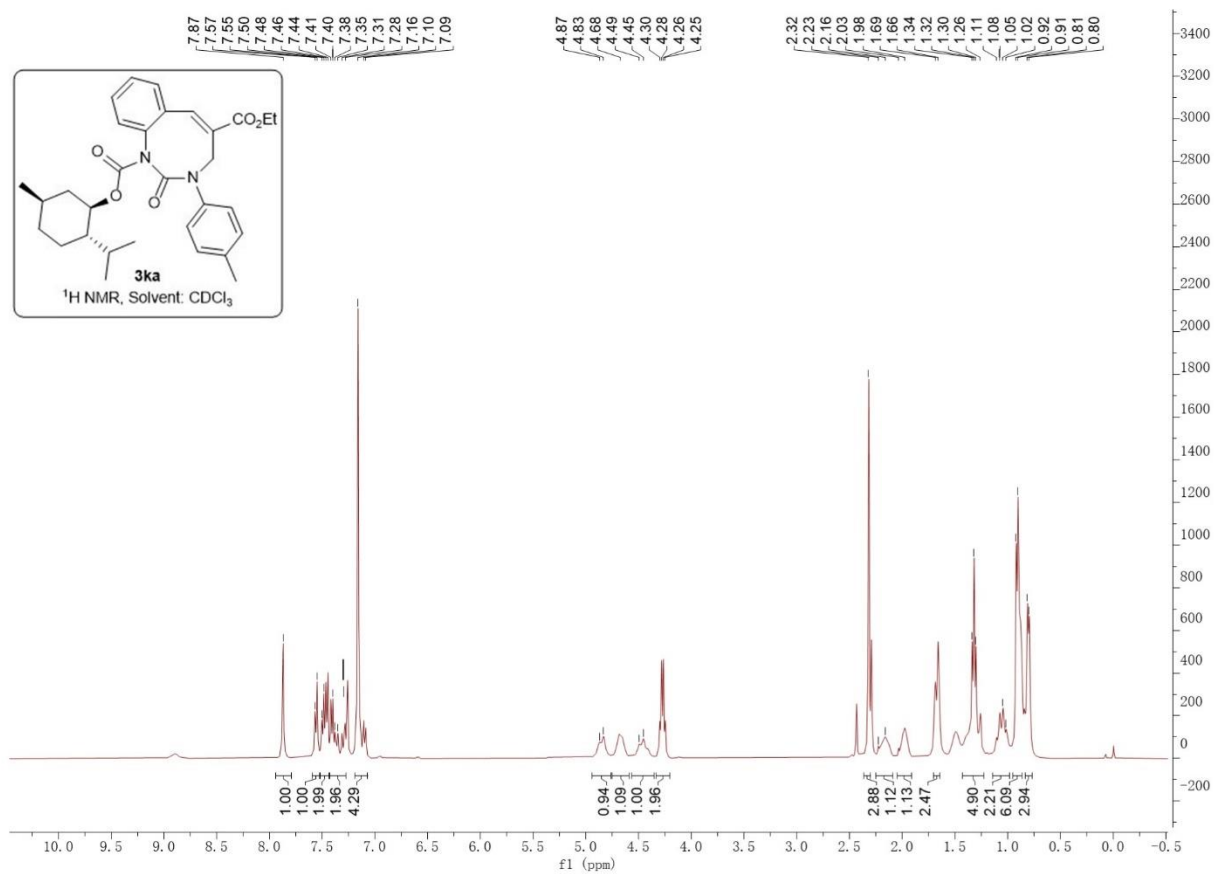

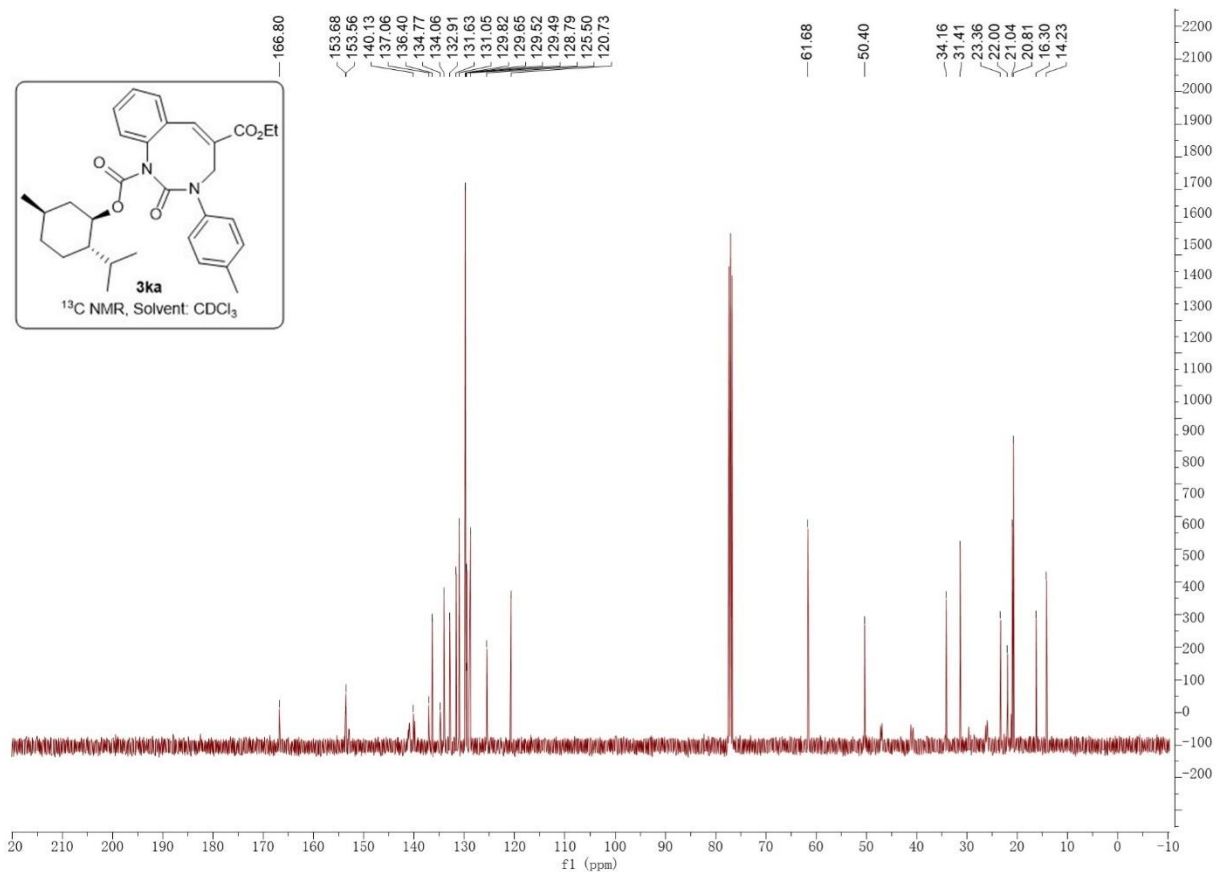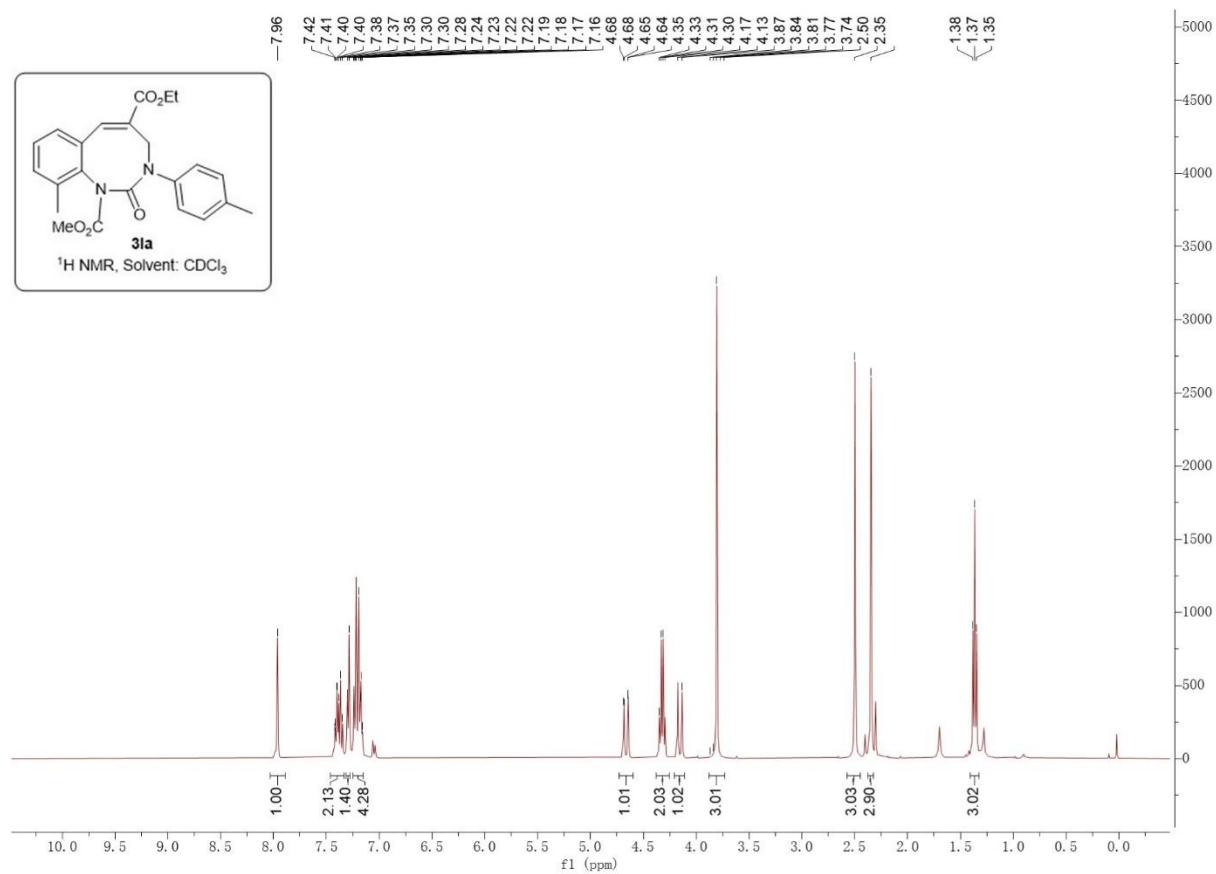

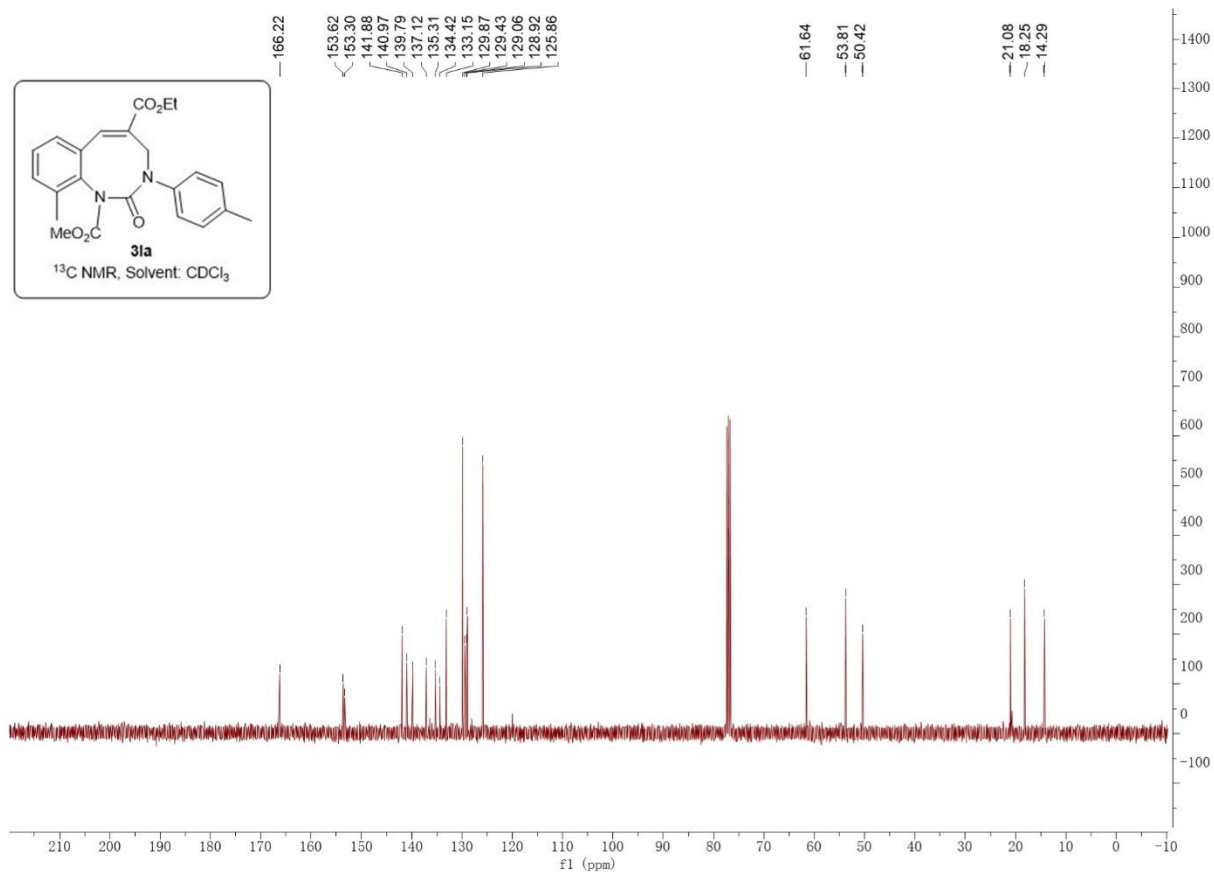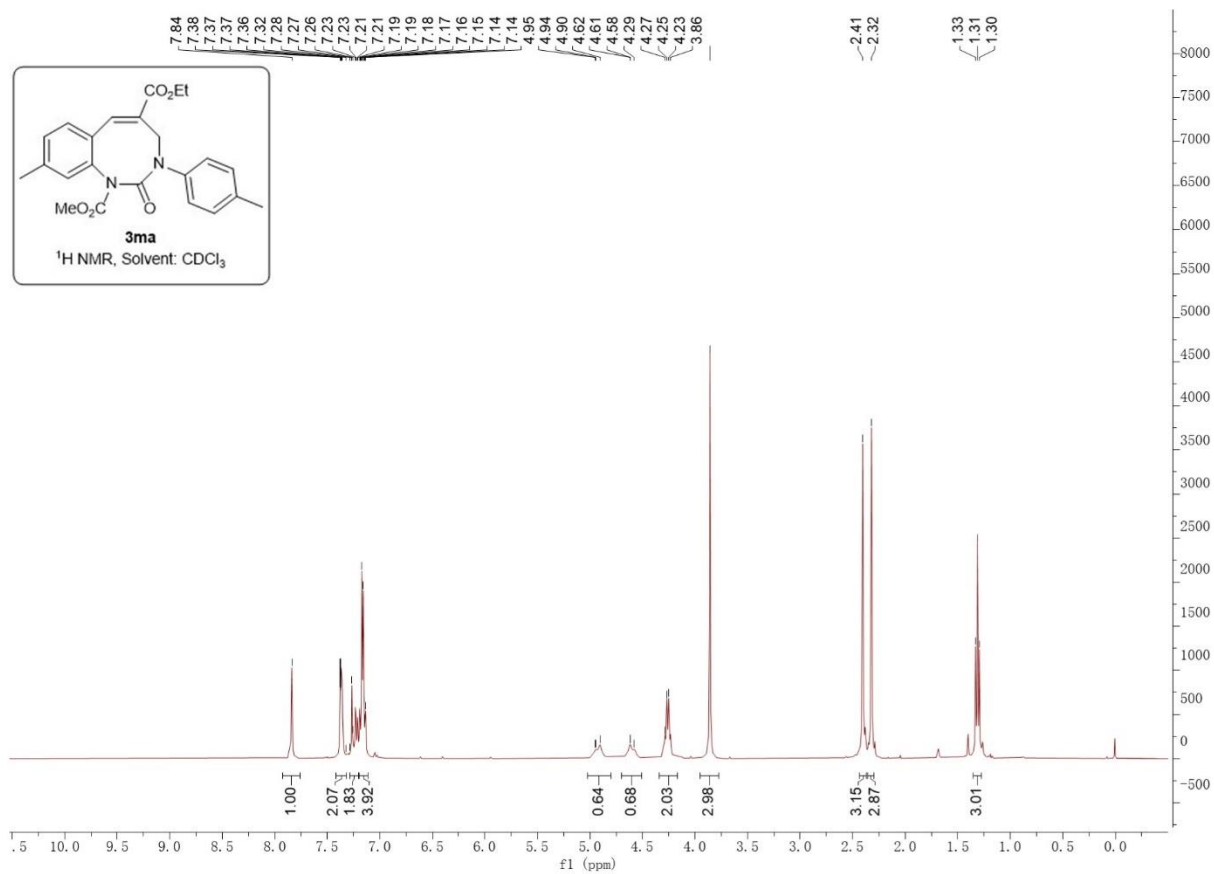

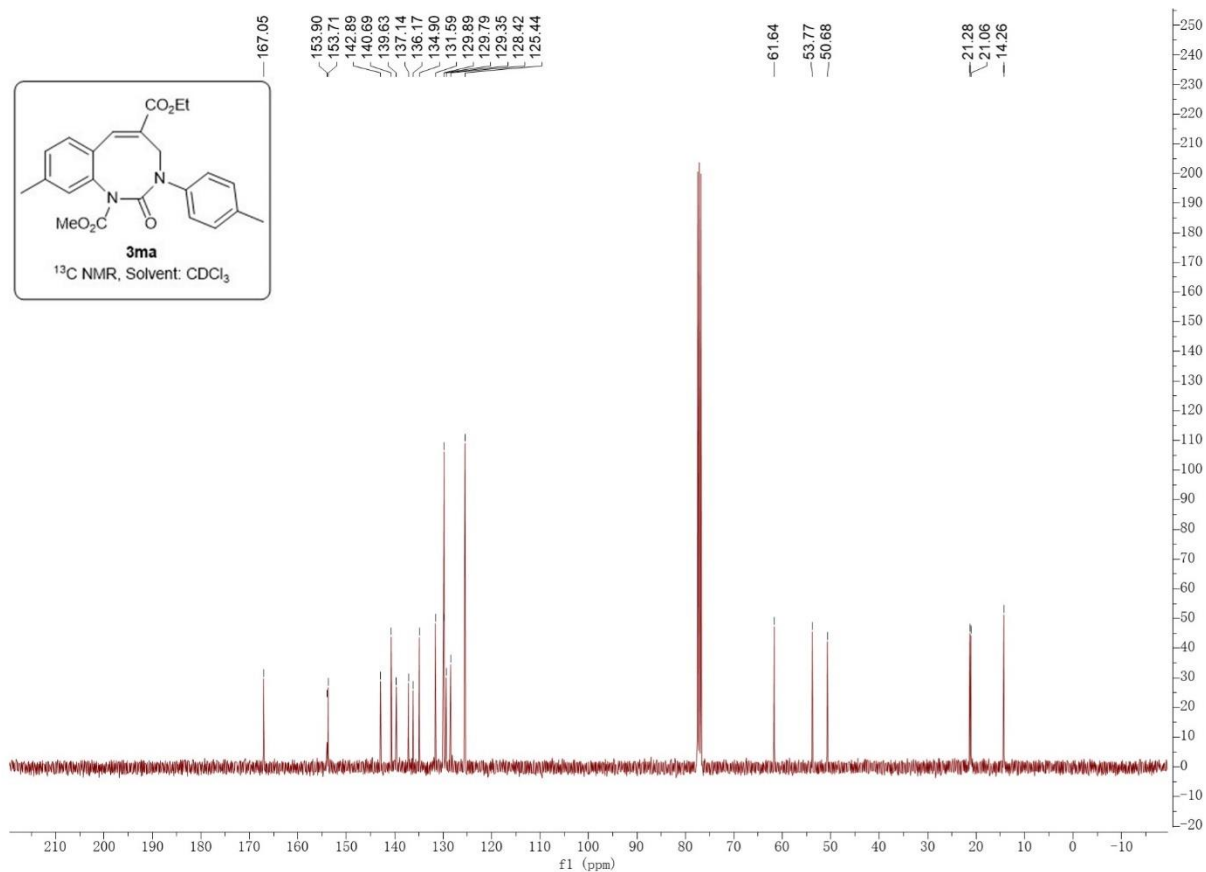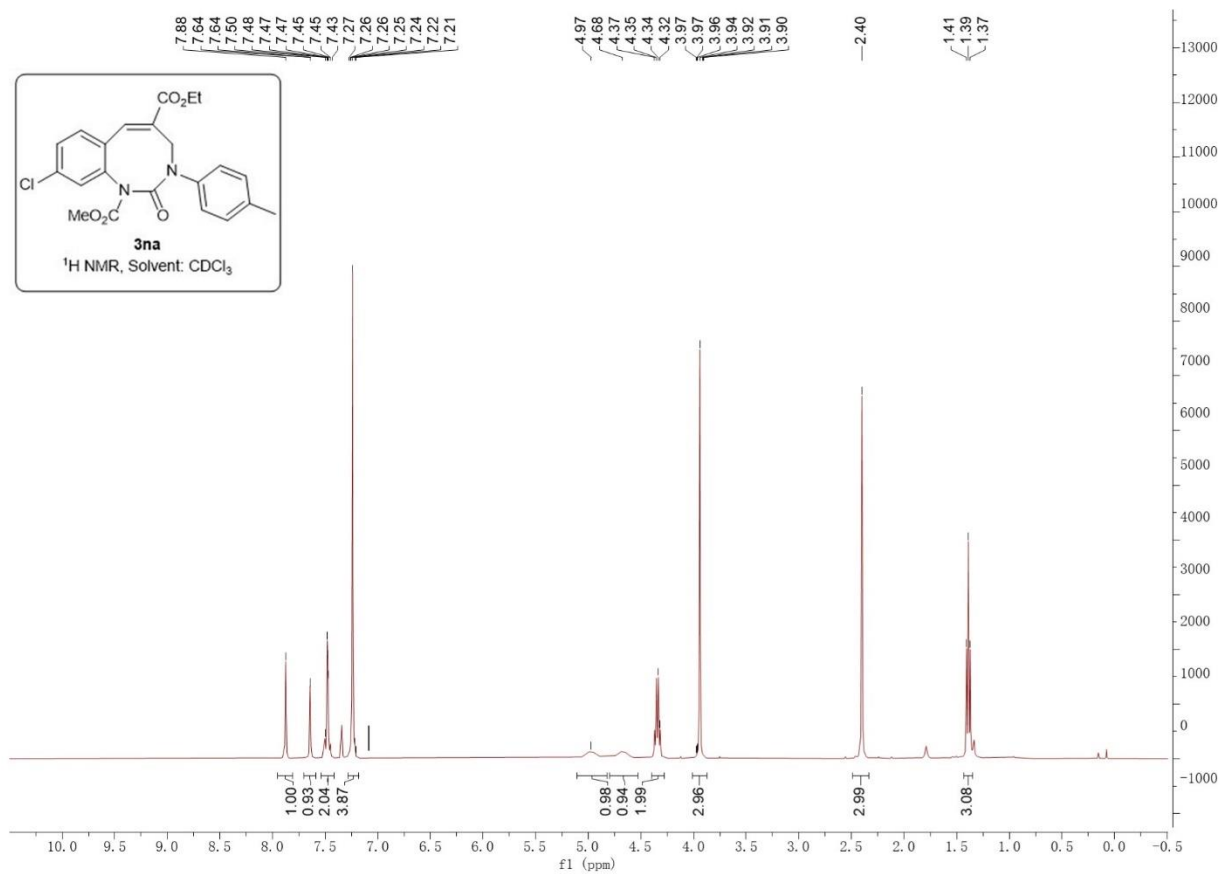



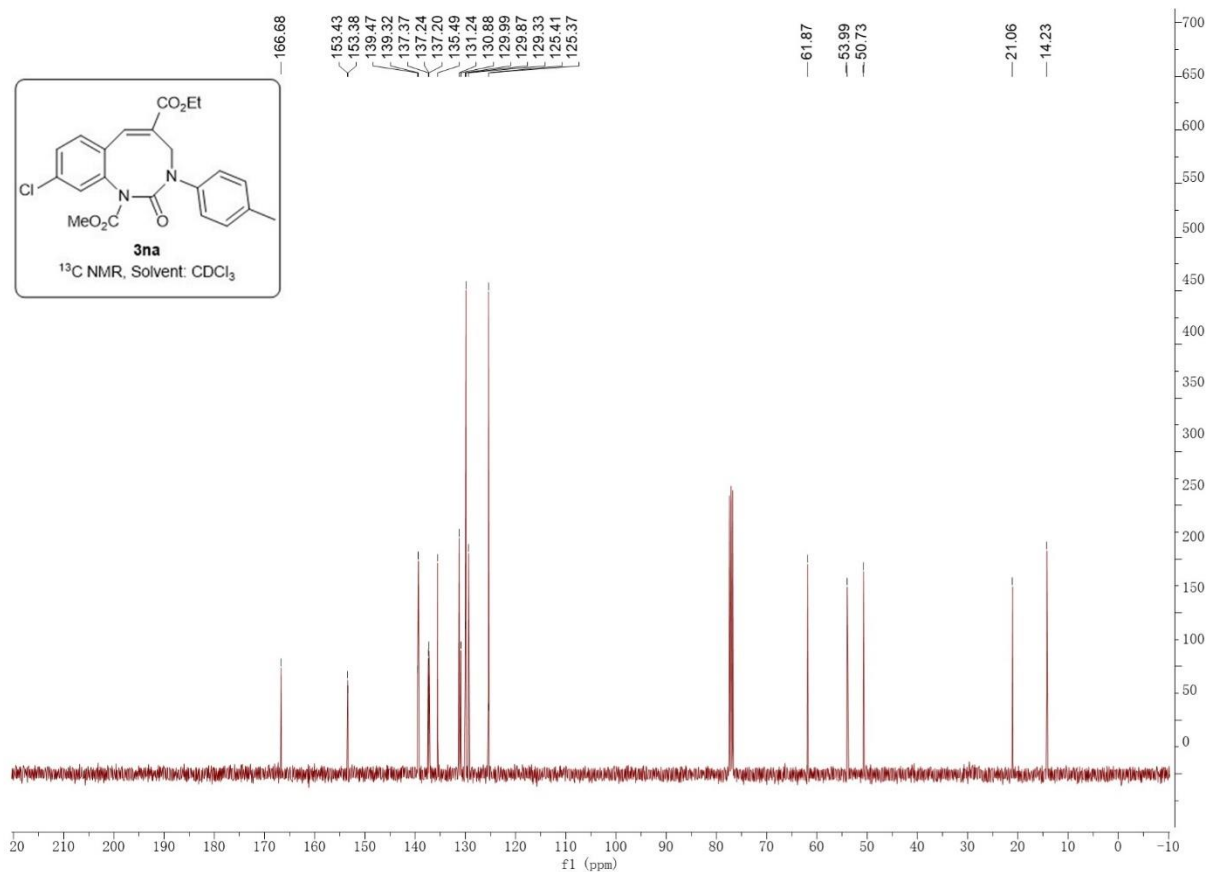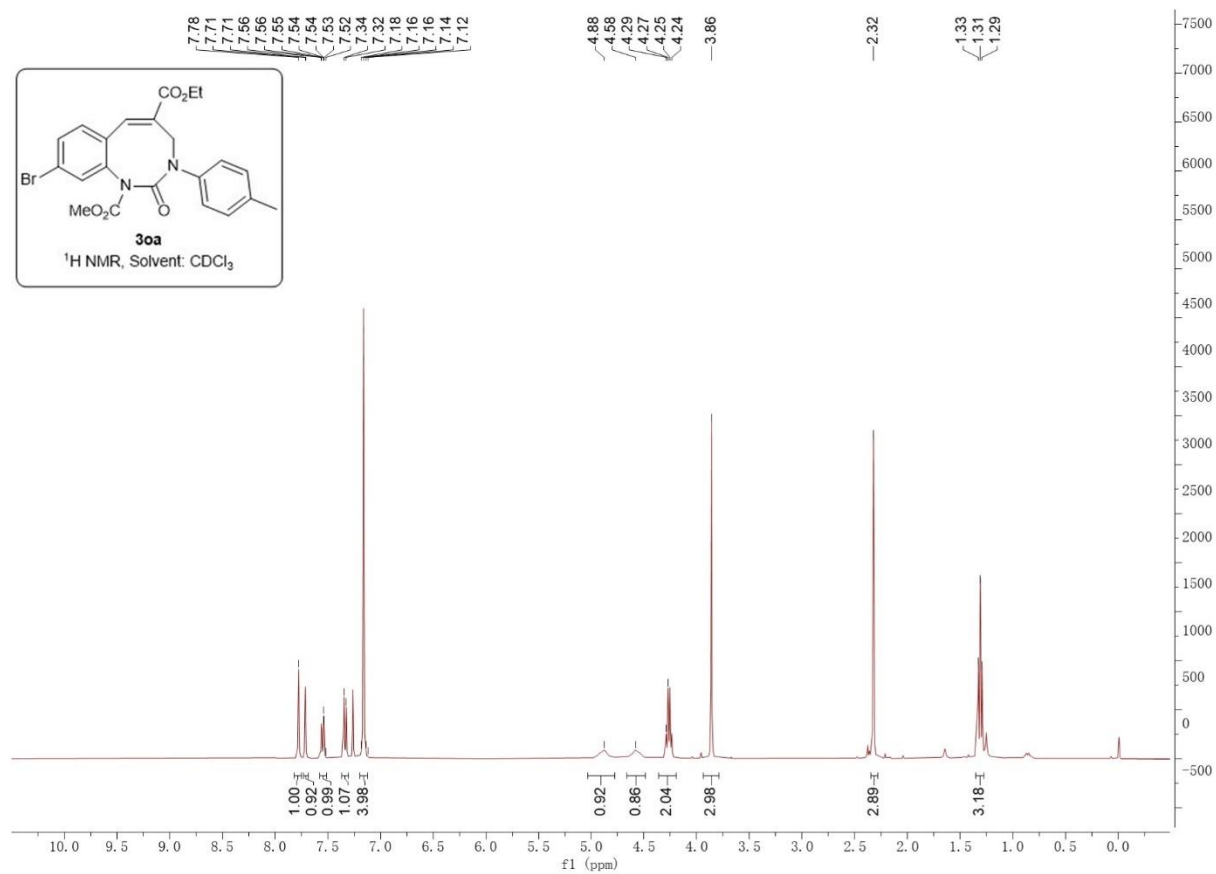

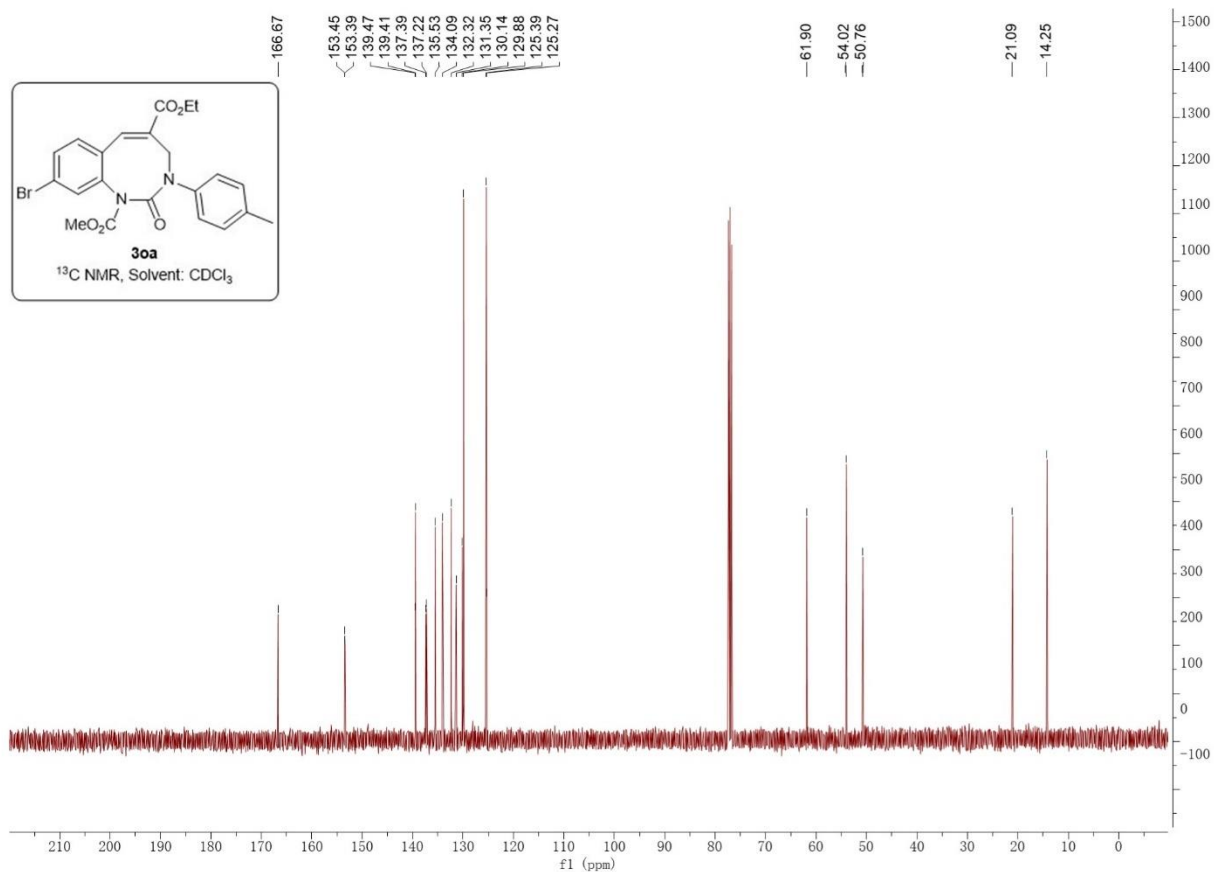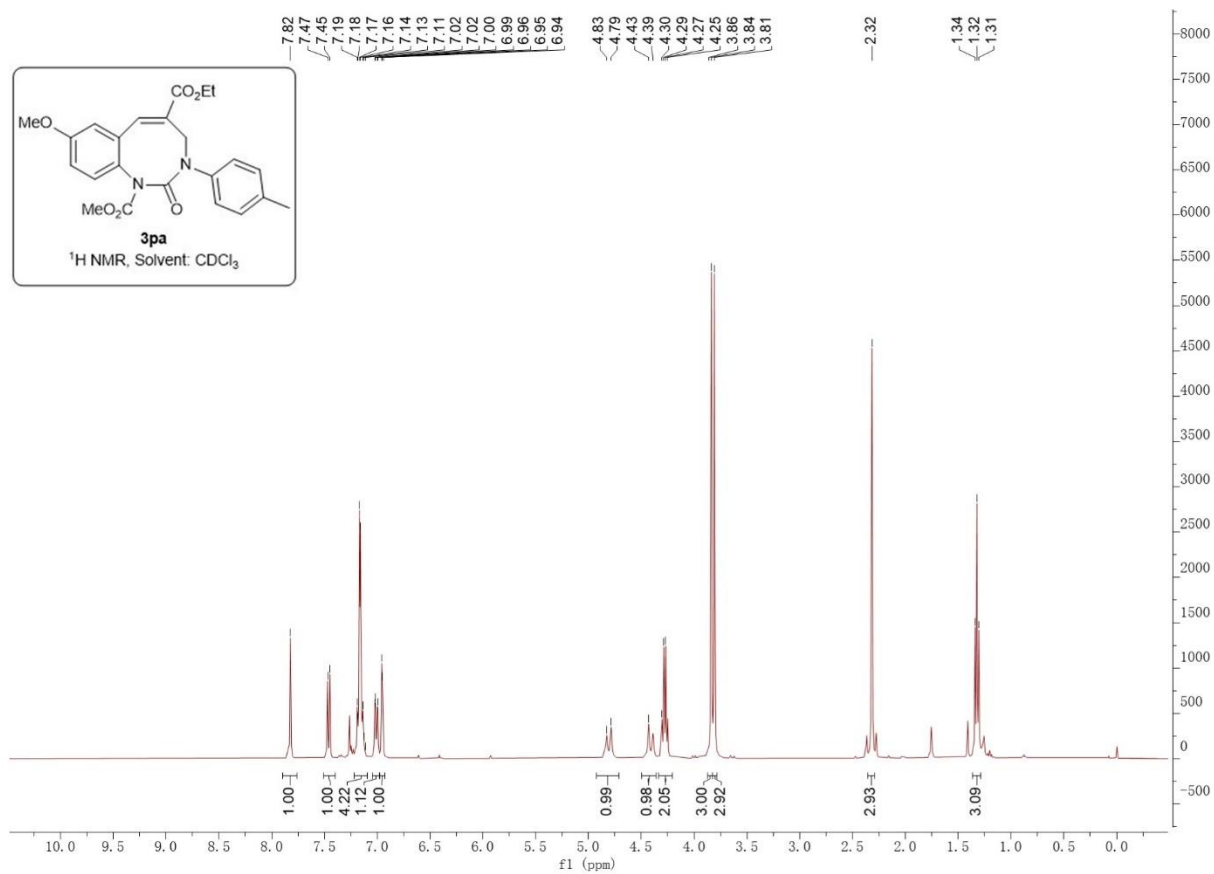

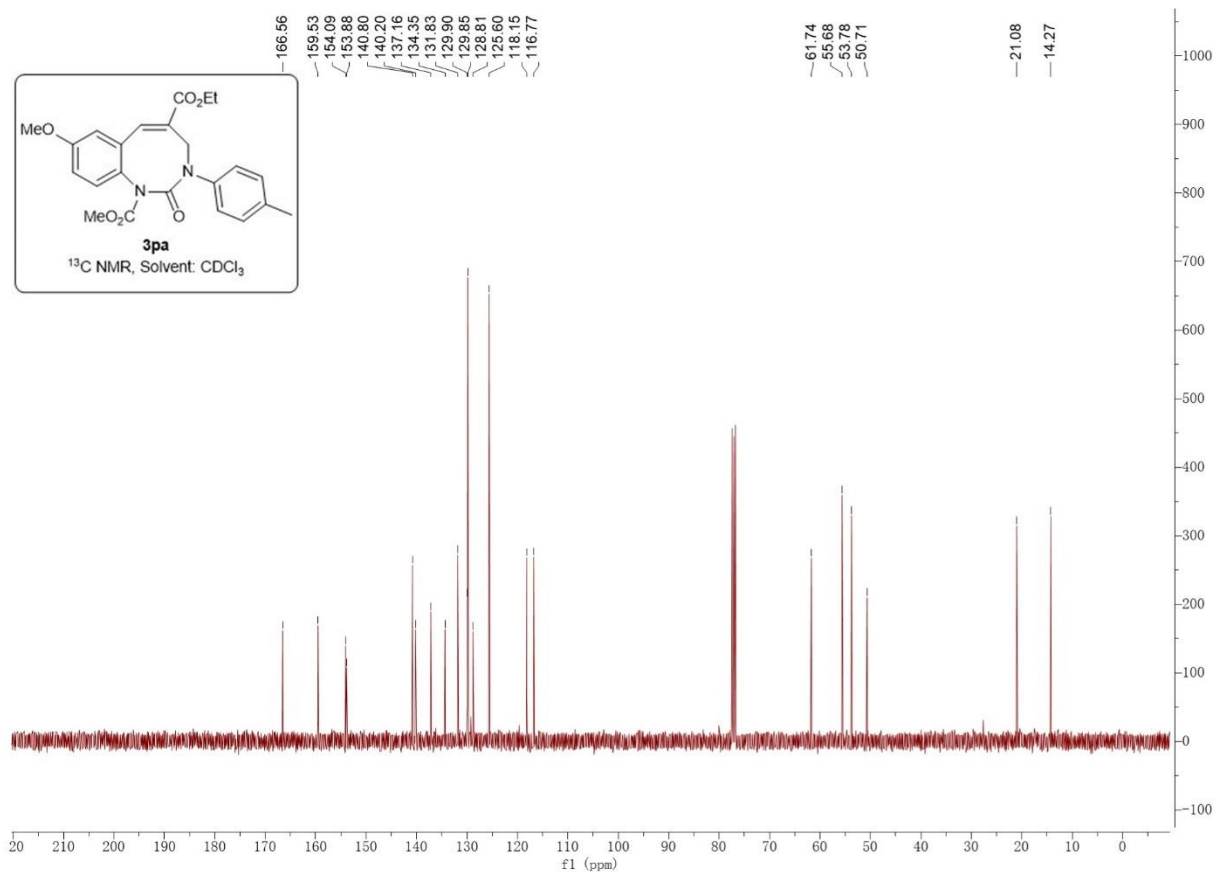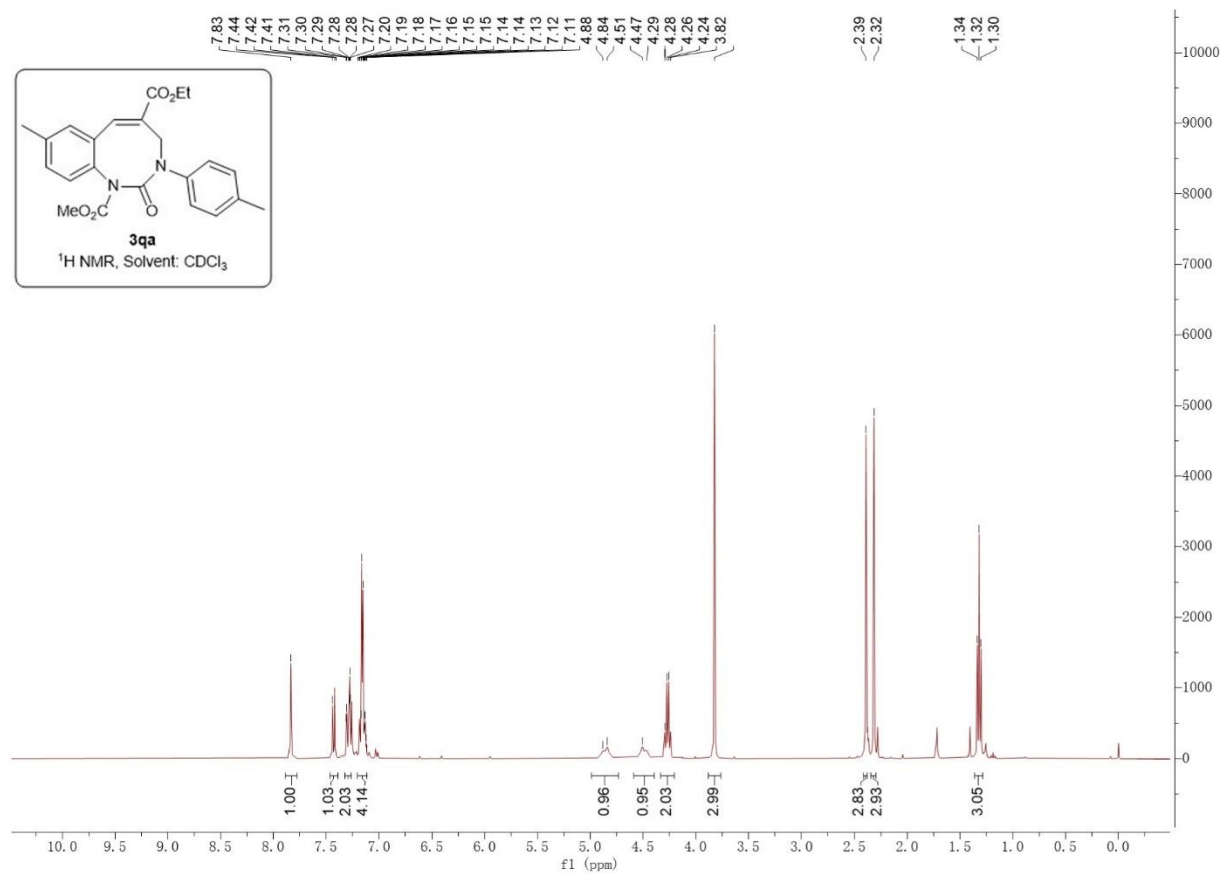

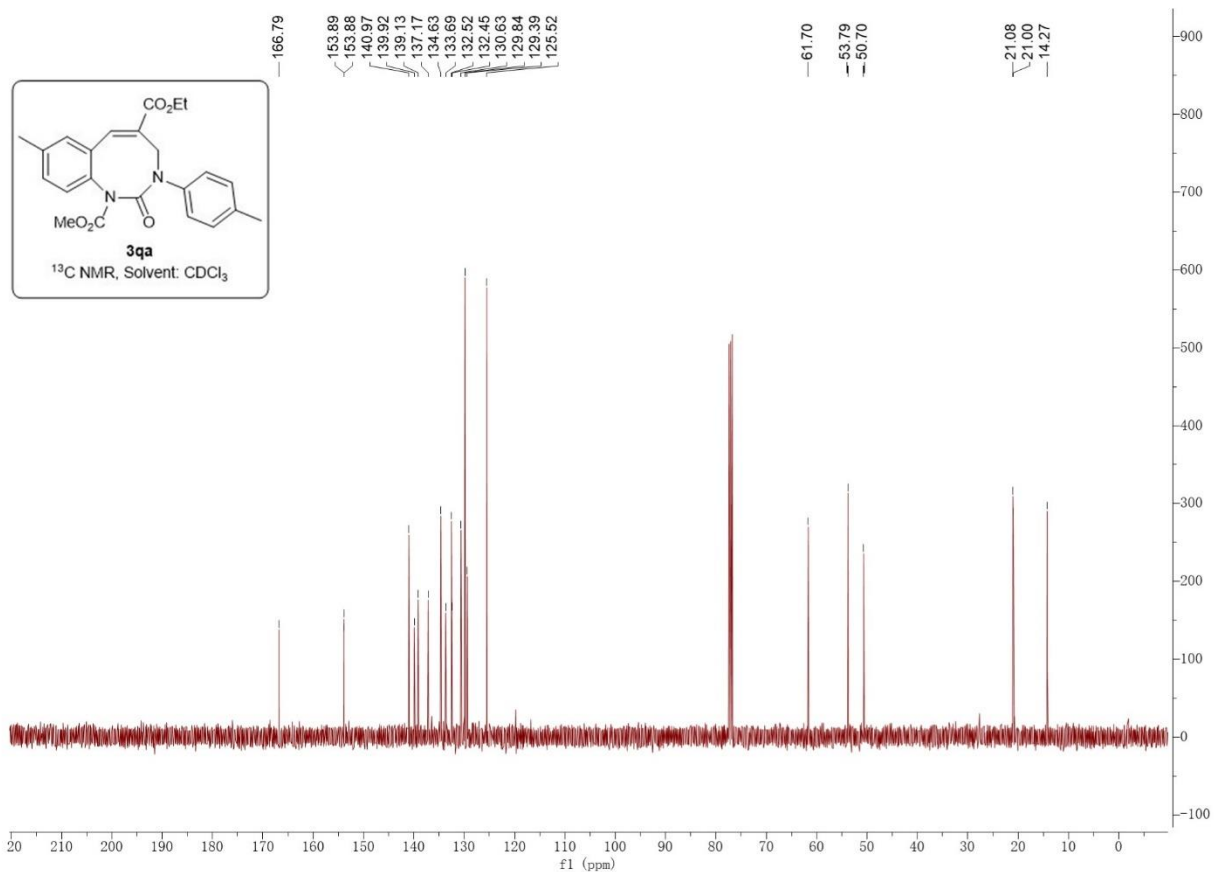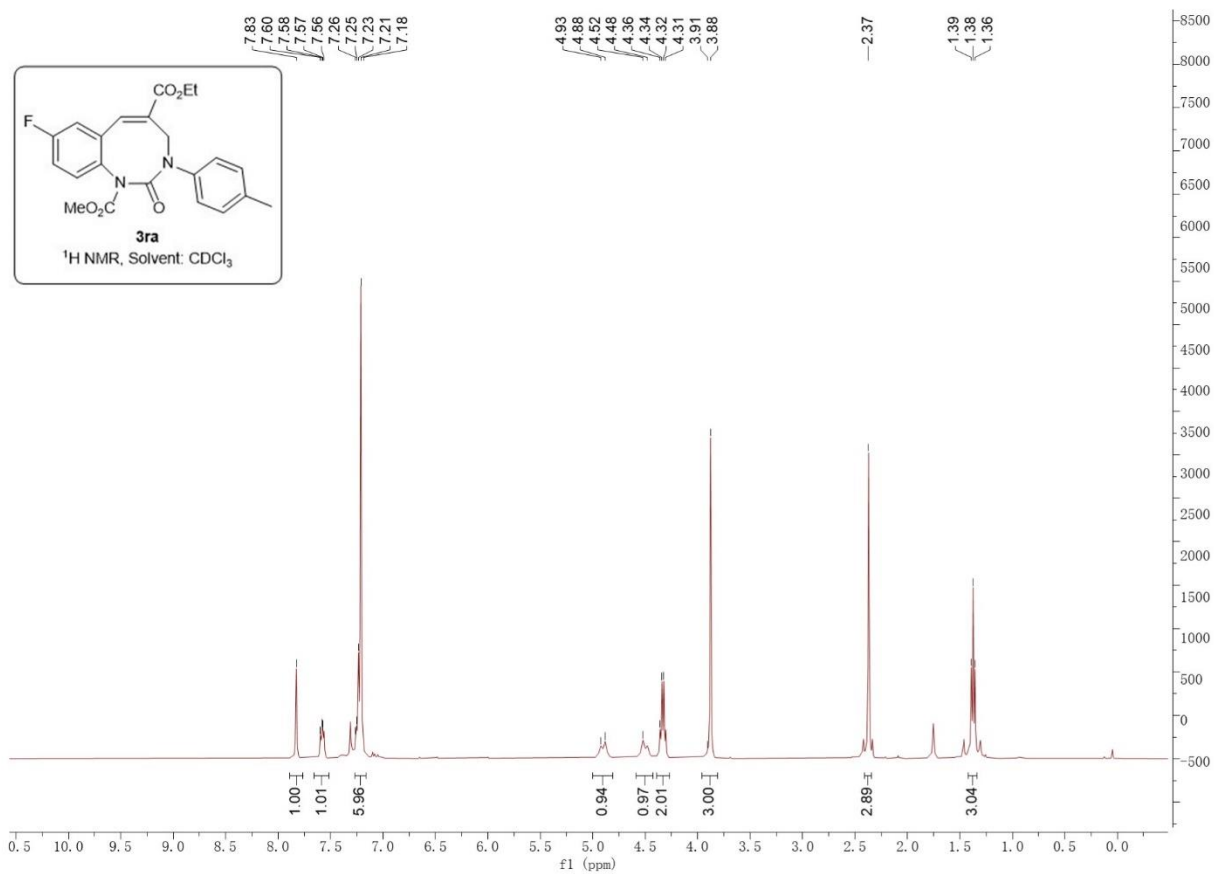

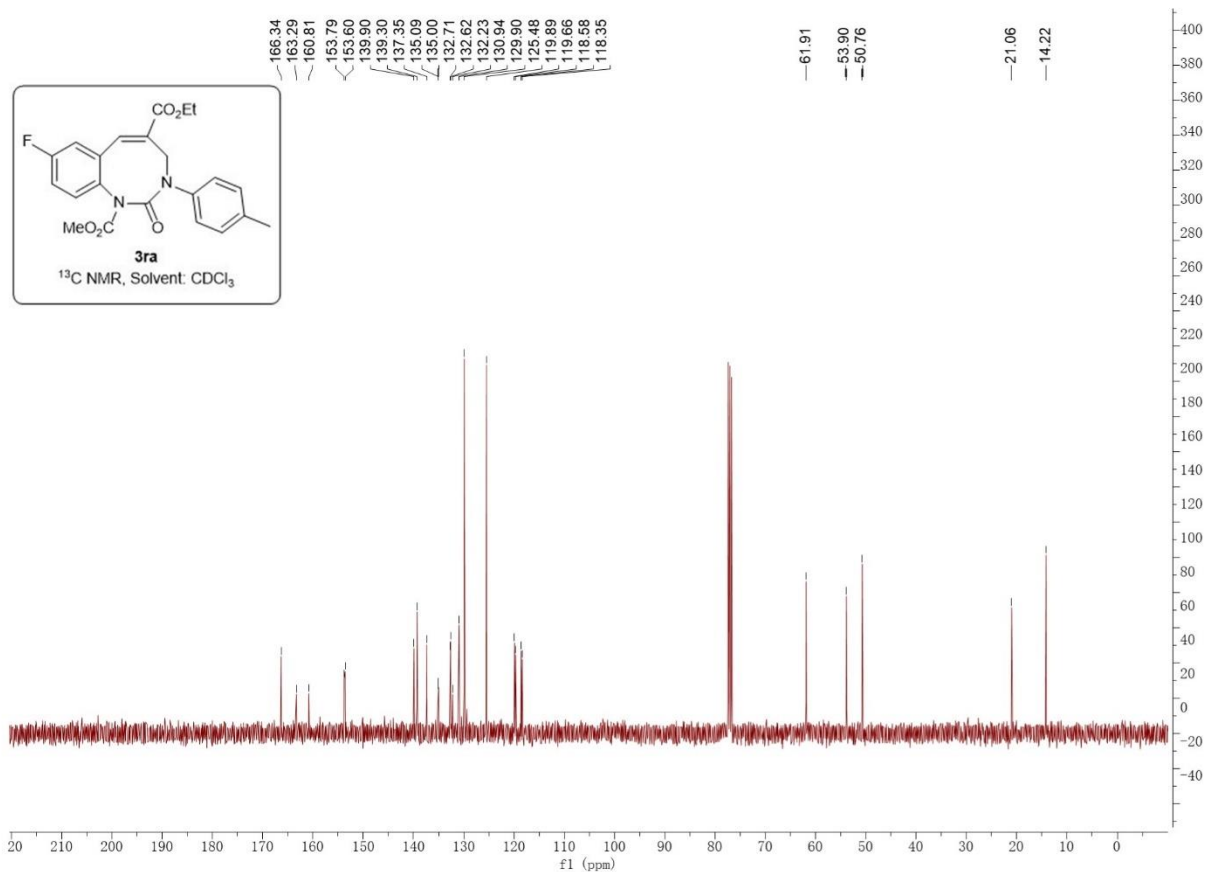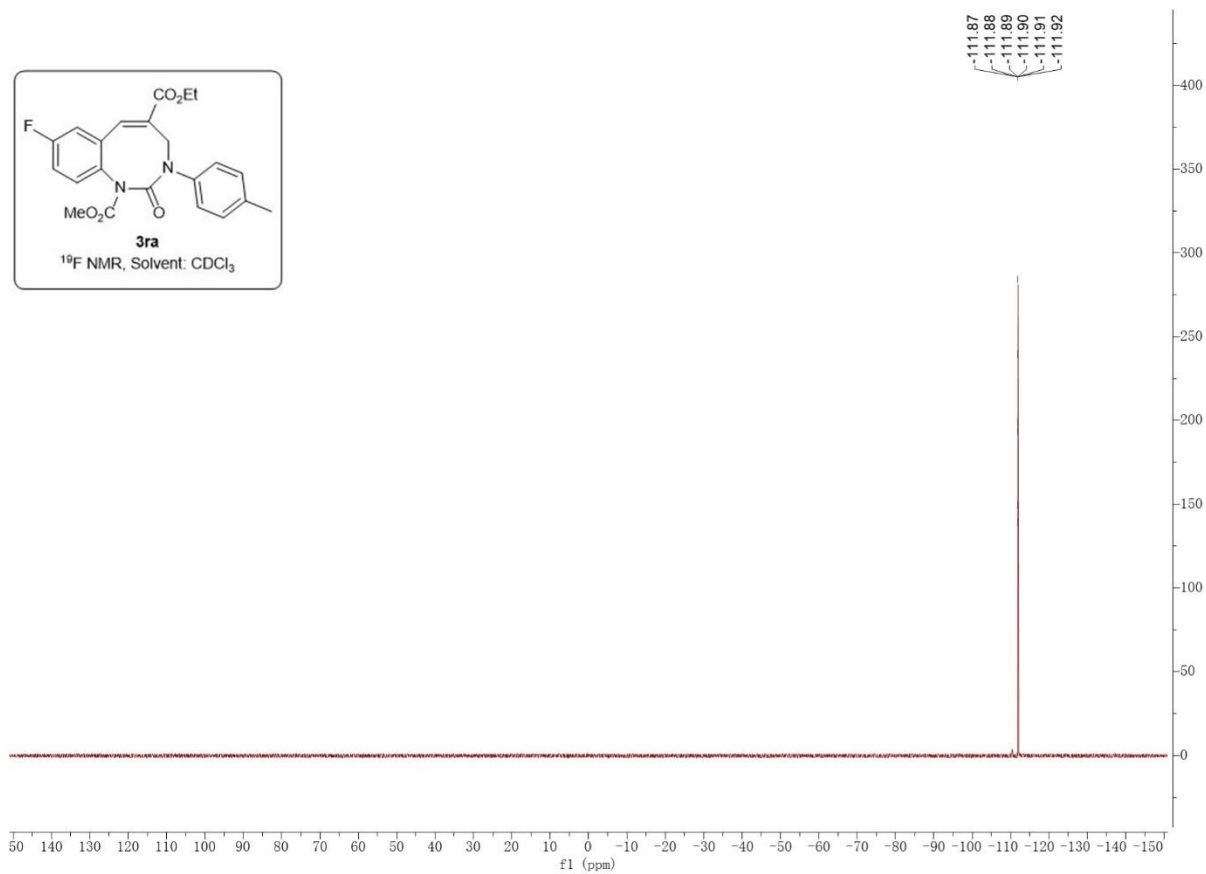

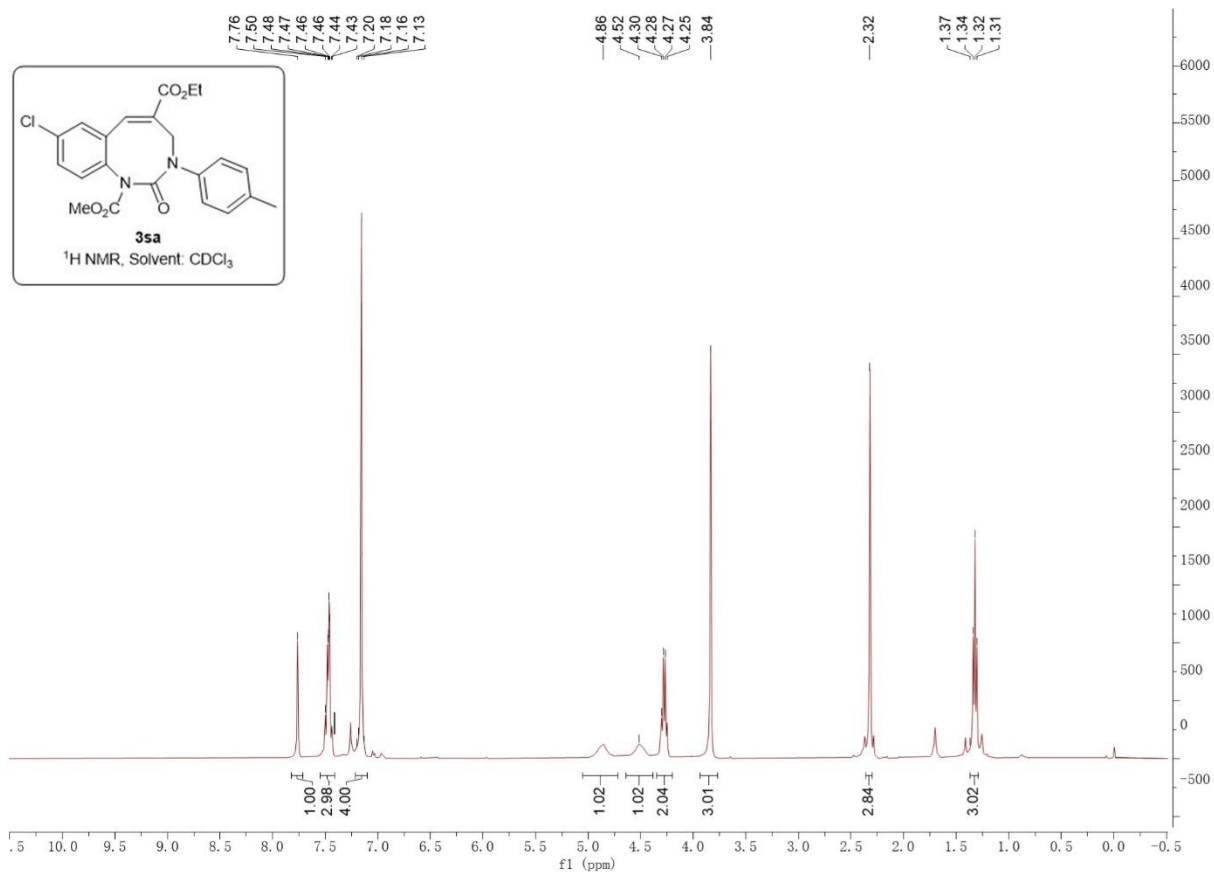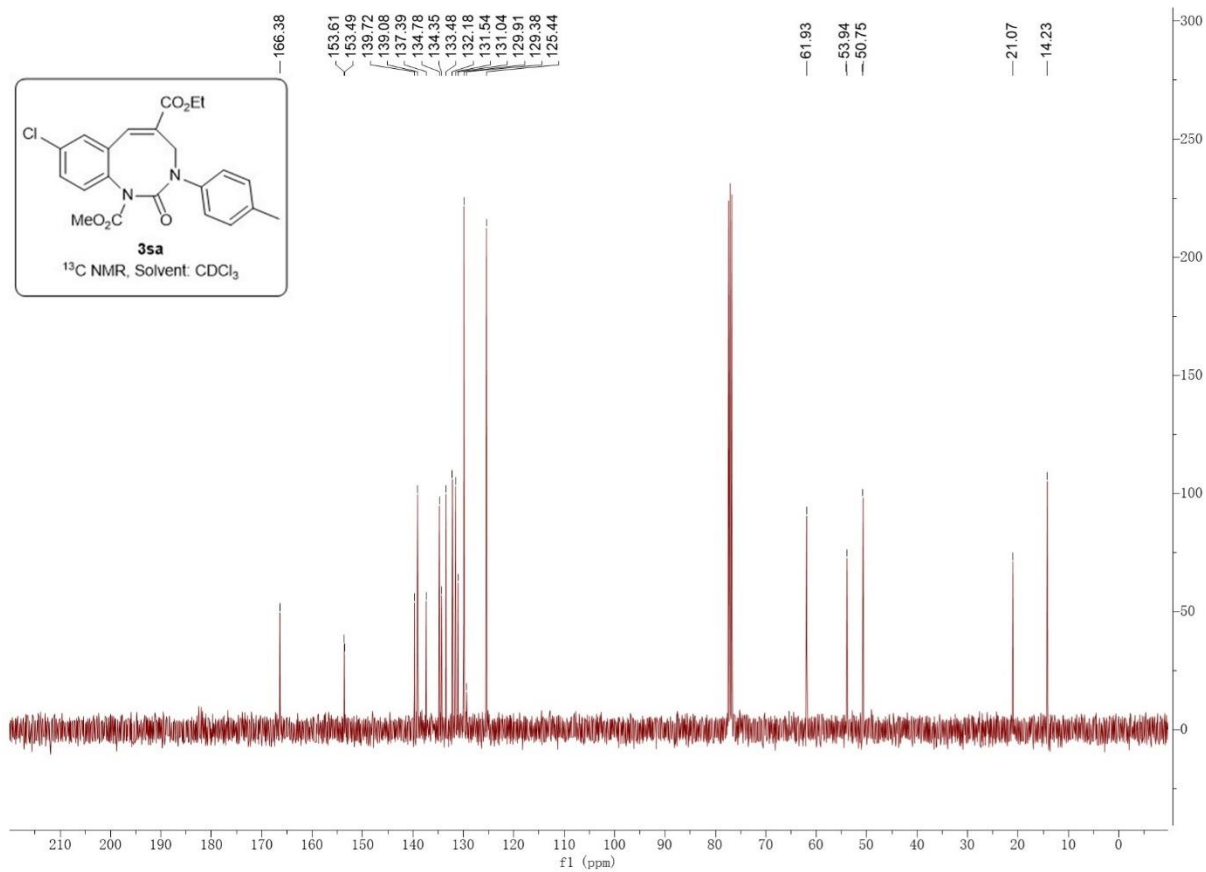

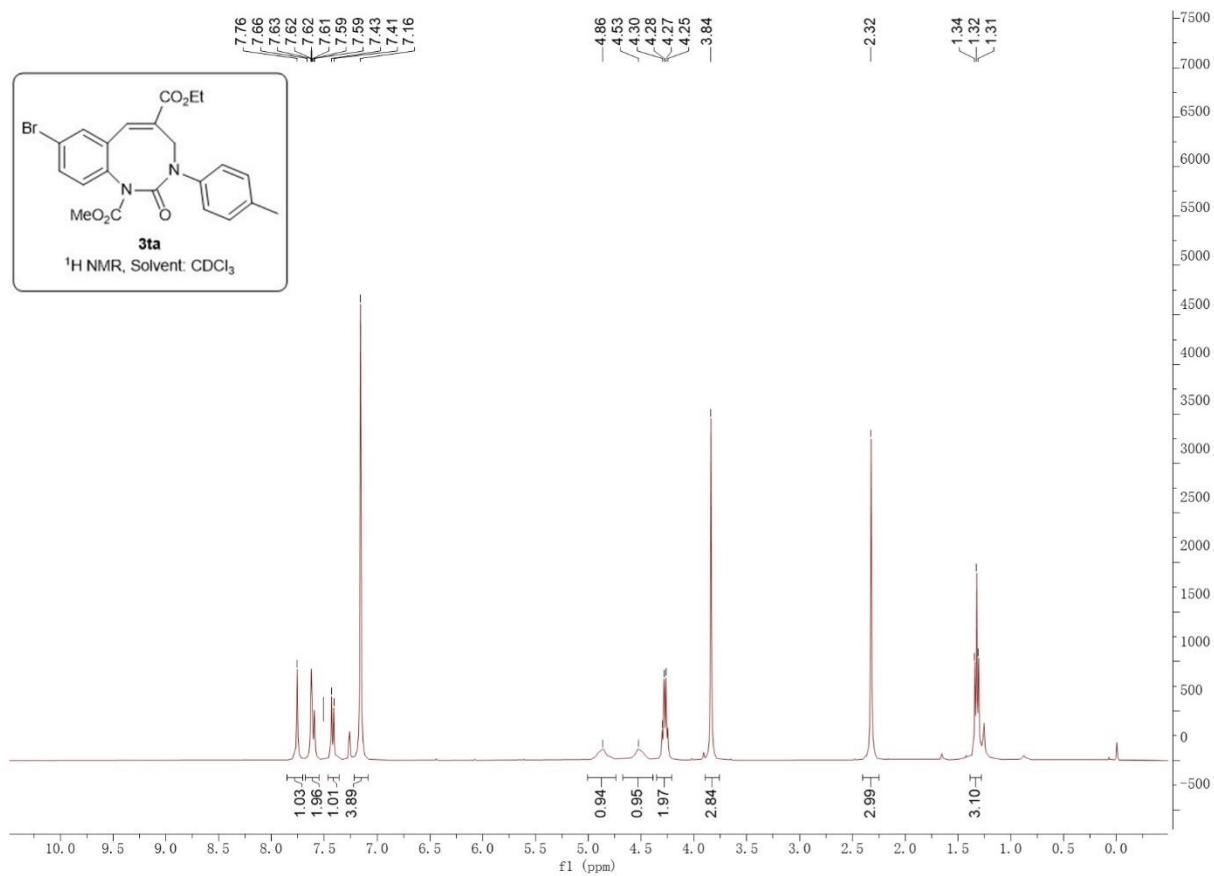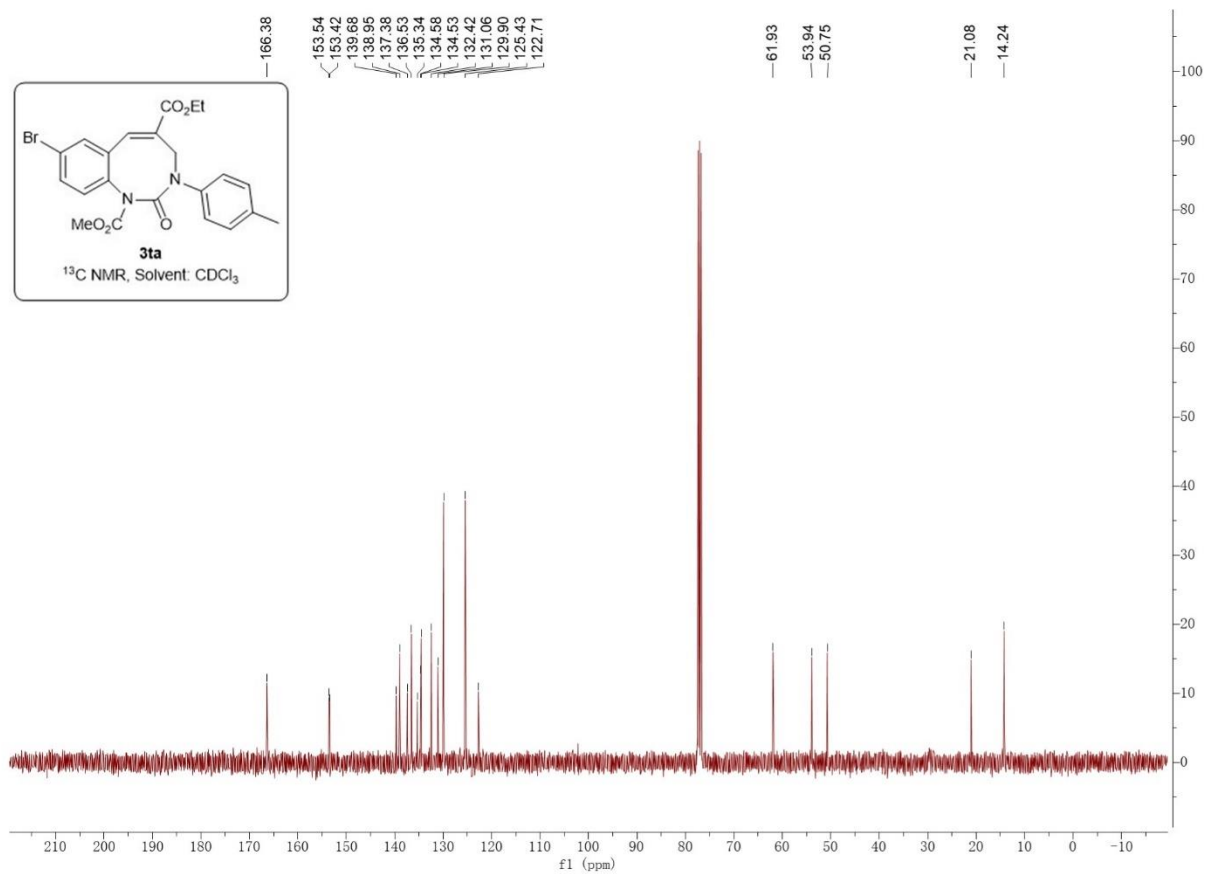

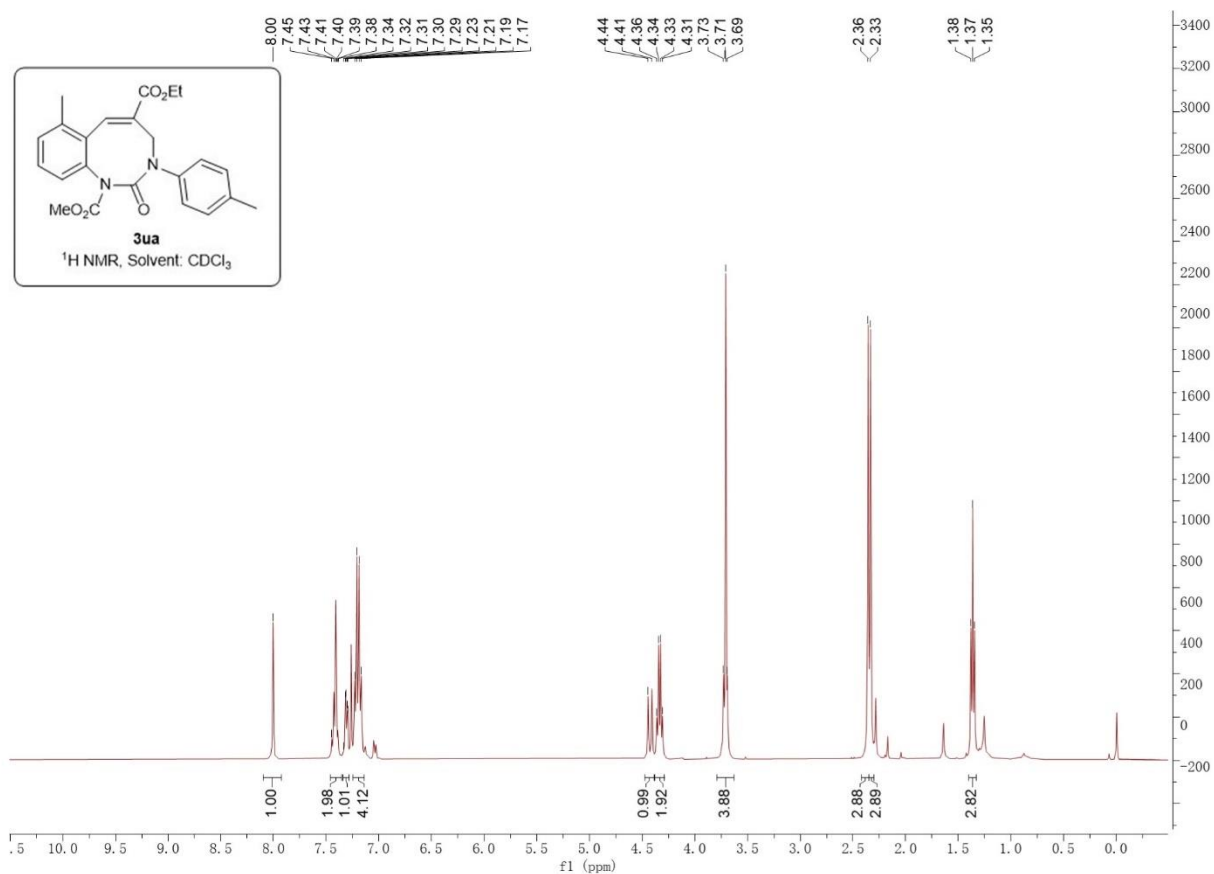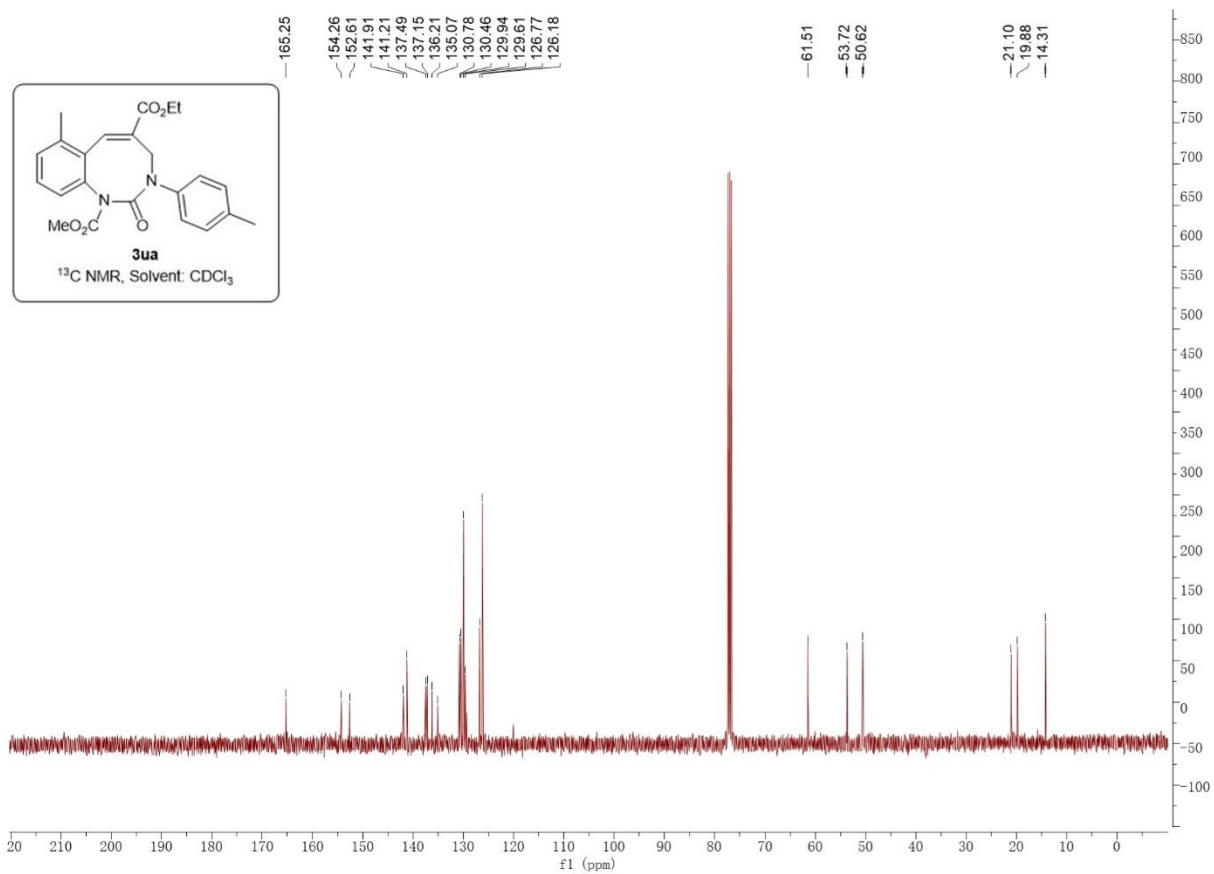



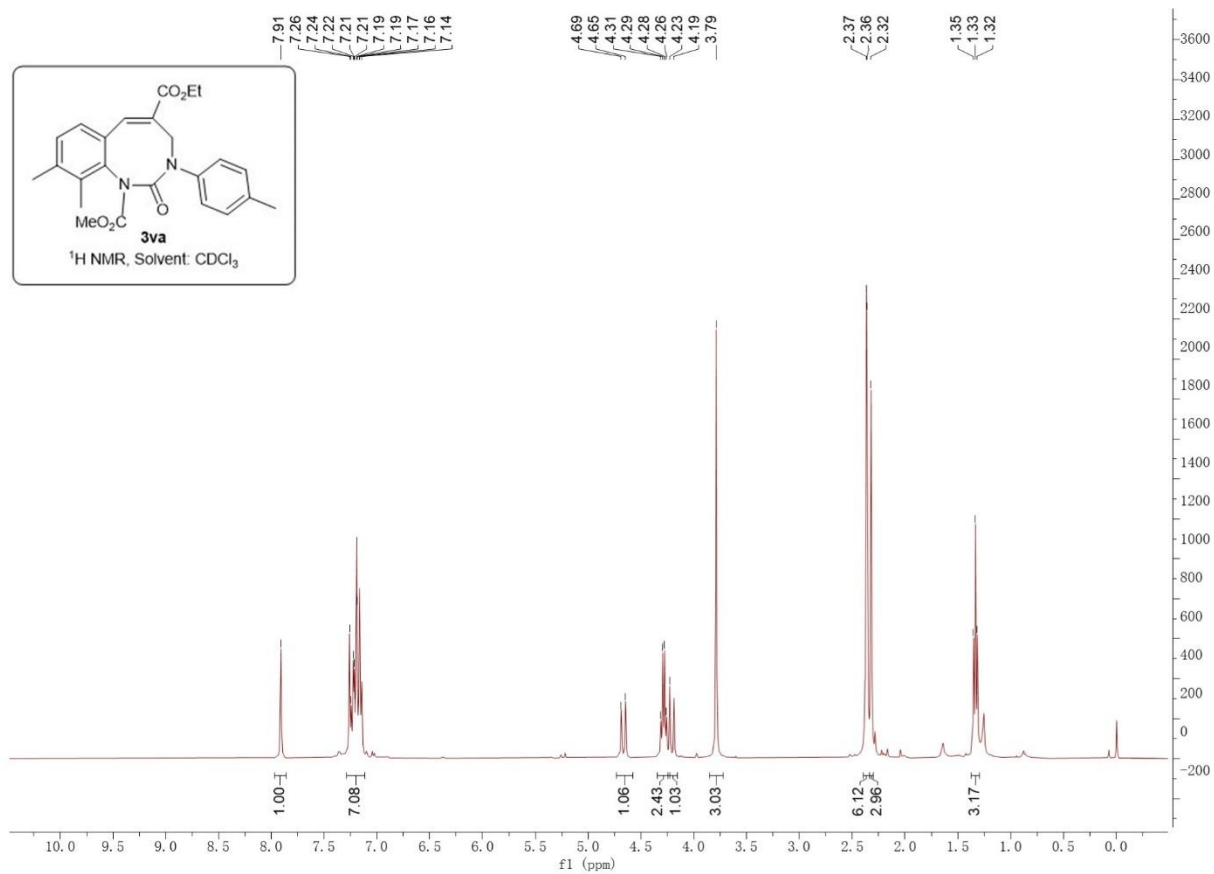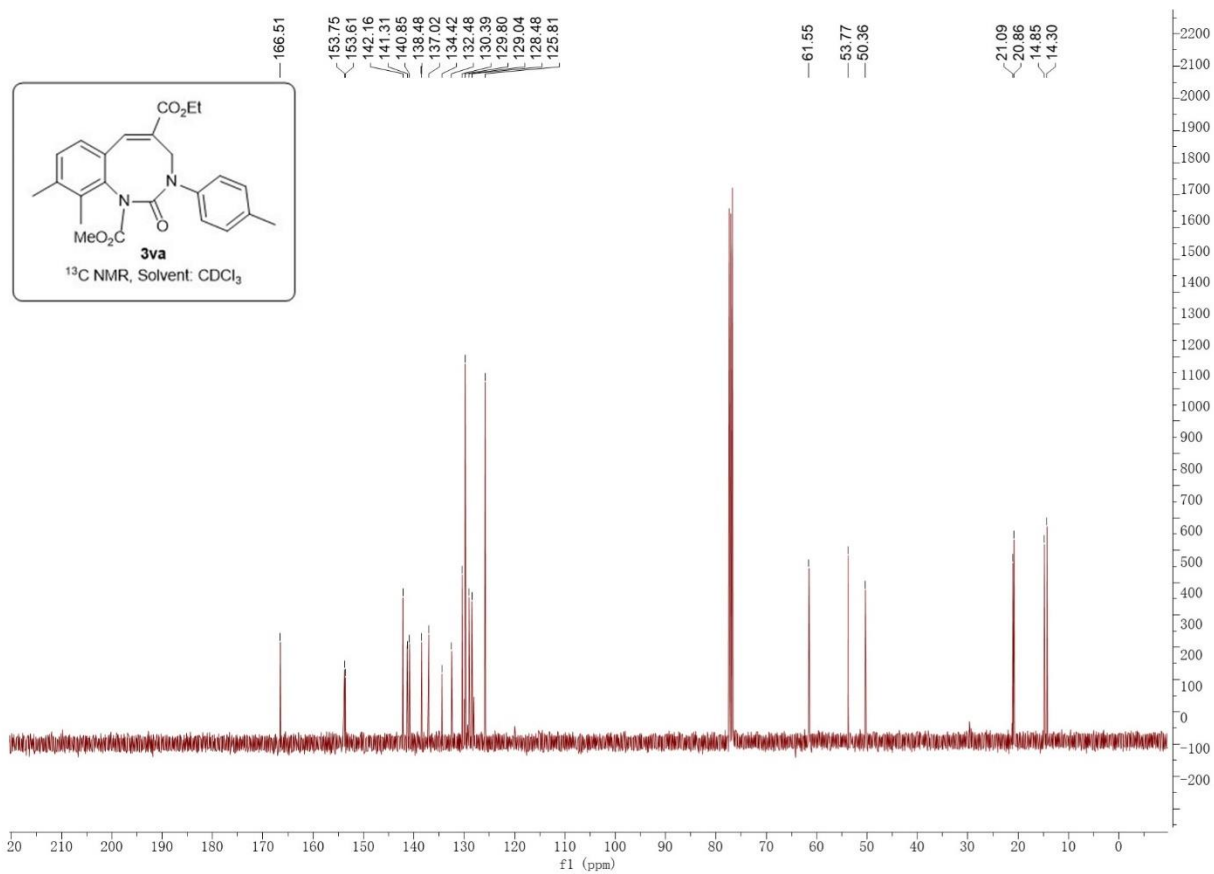

## 8.2. Products of Derivatization

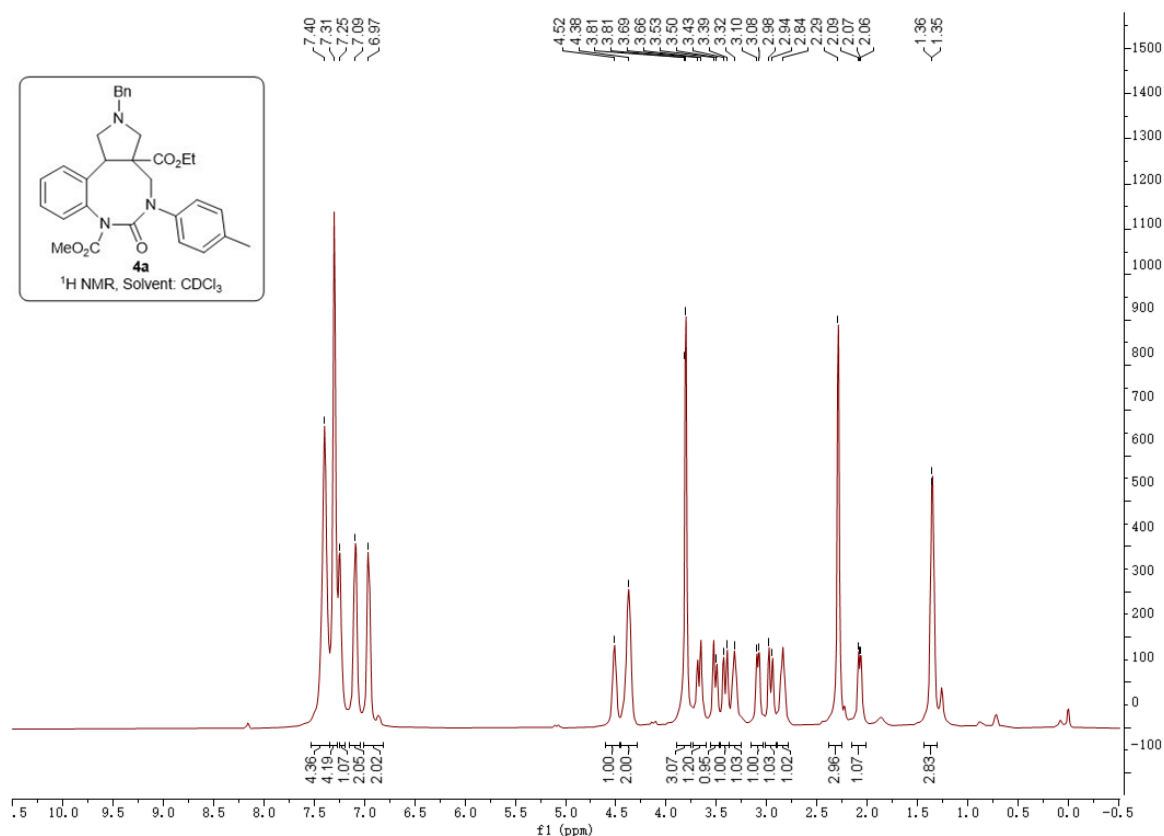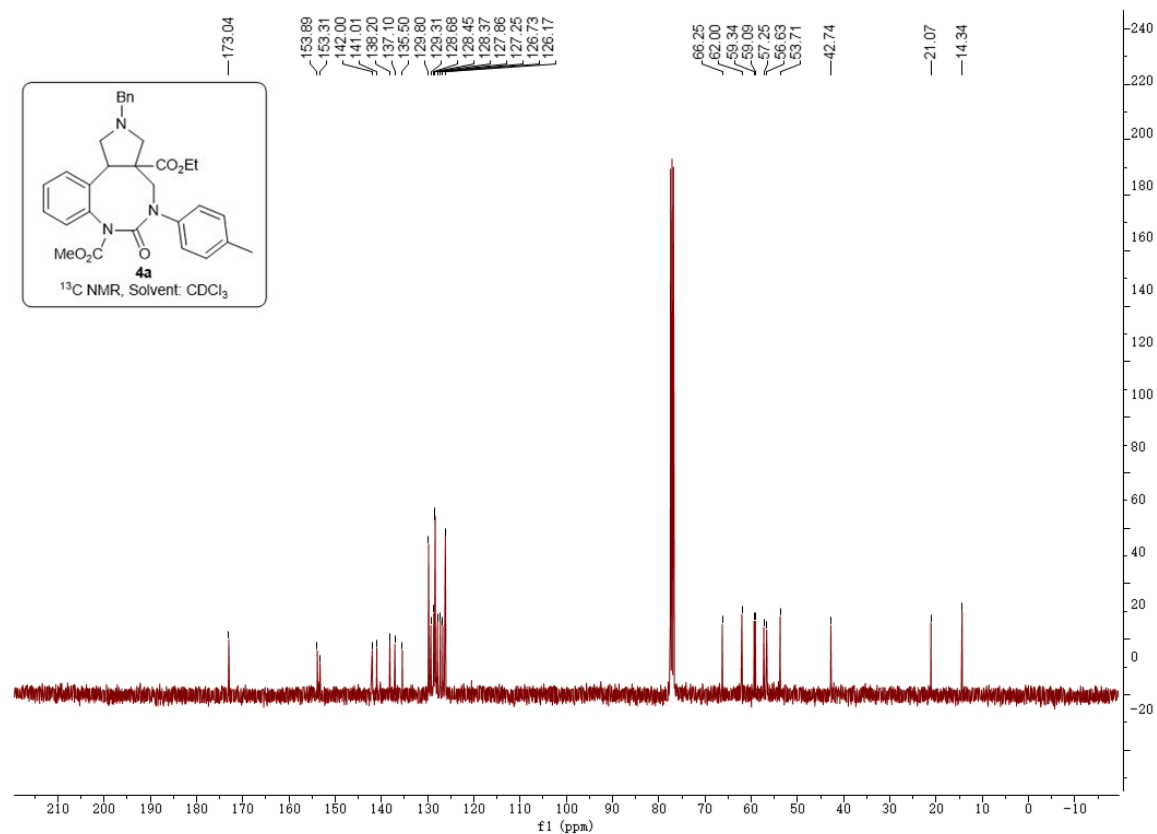

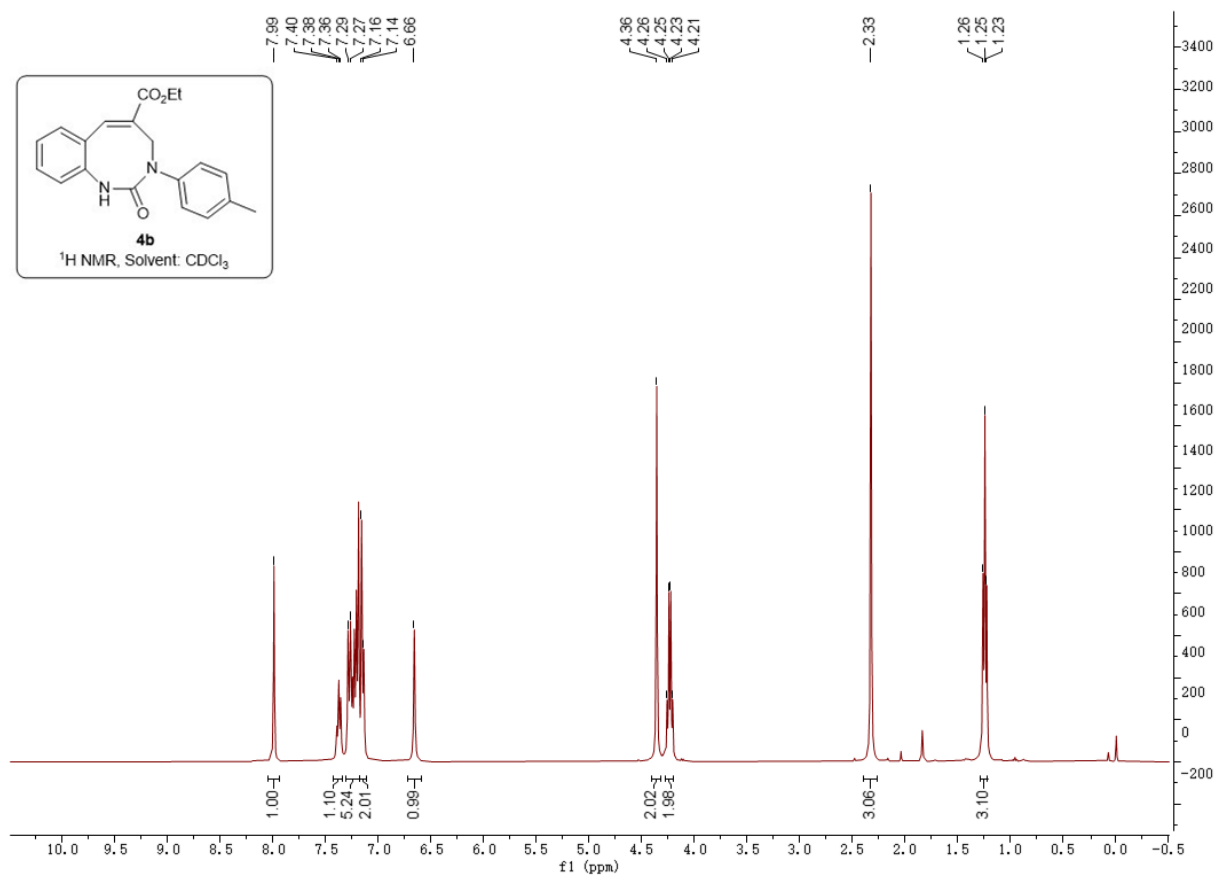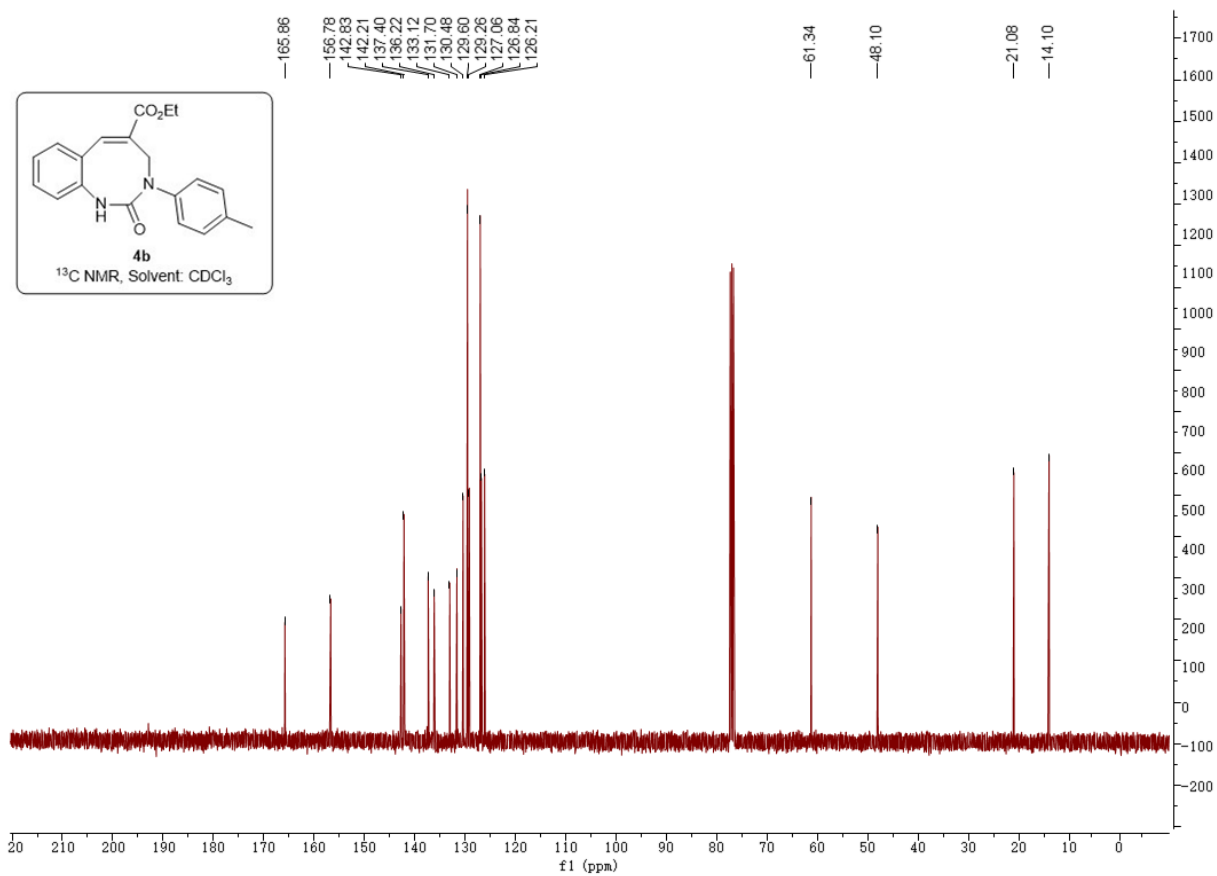

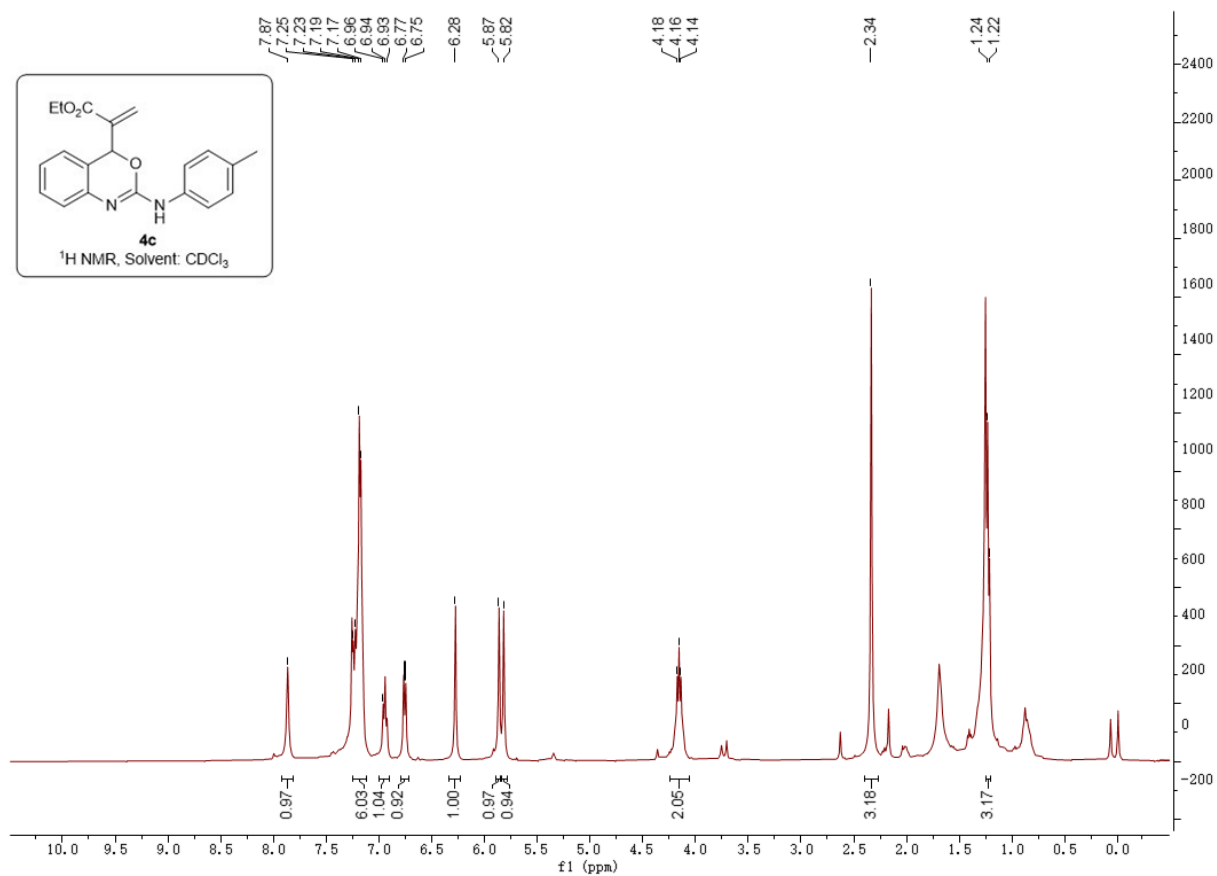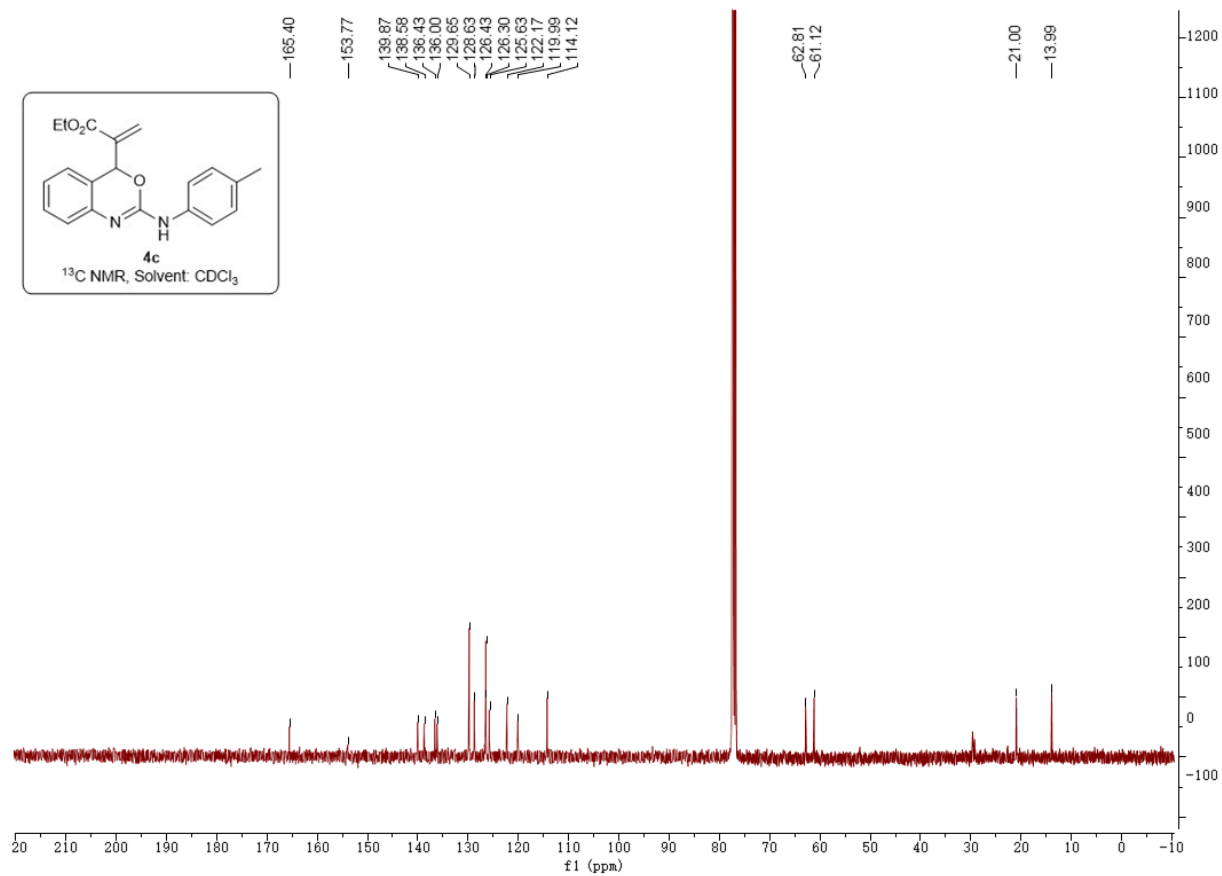

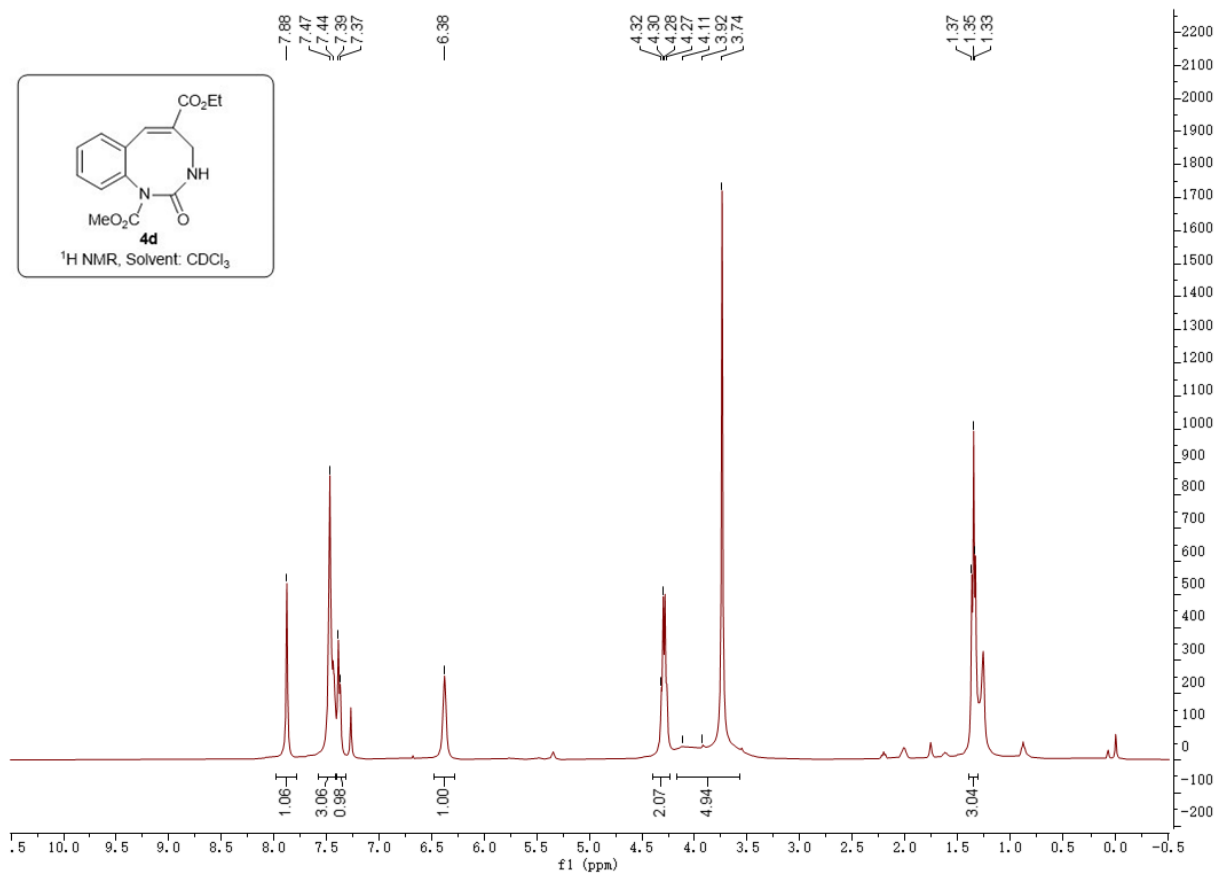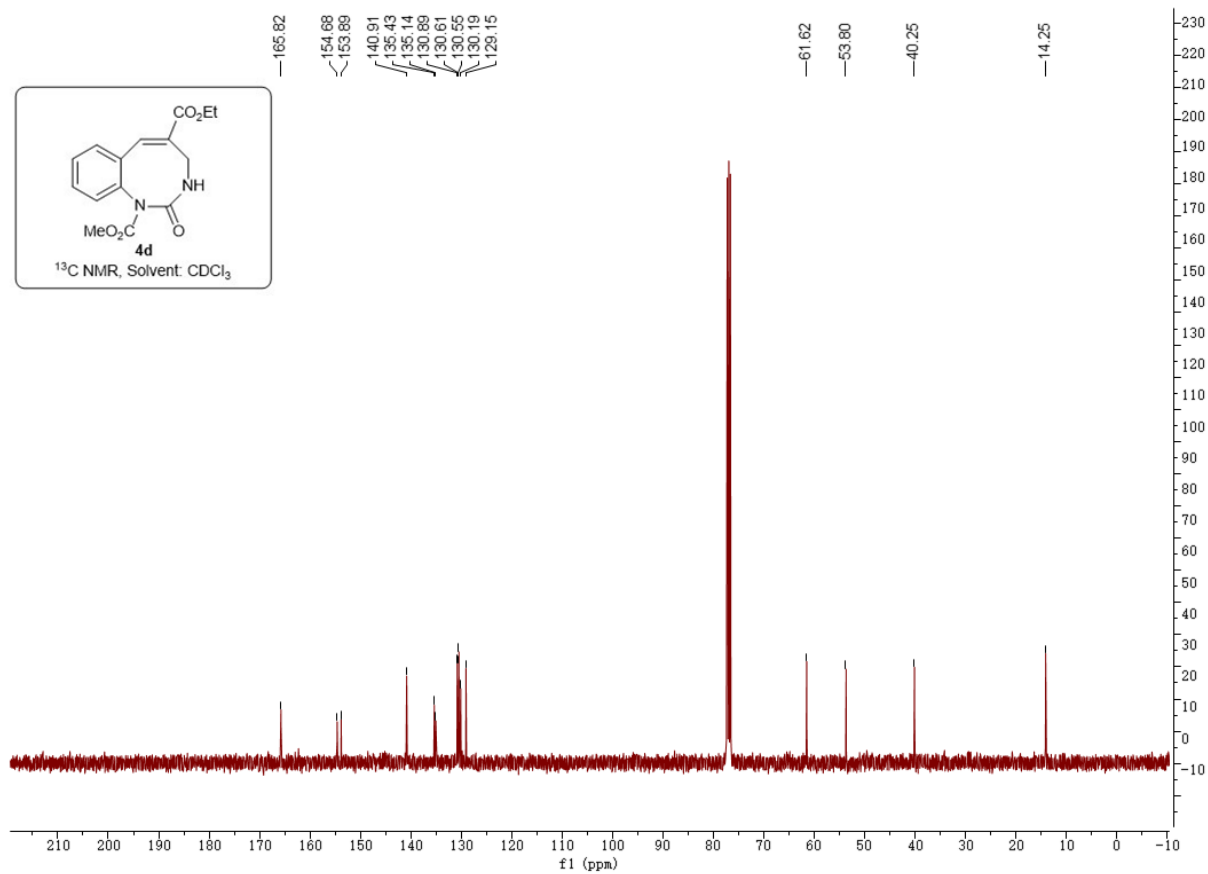

Supplement: Supplementary file 1 [file 28675217]
